# Supplementary material
Source: PubMed Central journal article supplement (PMC2849708)

# Supplemental data – HCD-MS2 spectra of post-translationally glycosylated peptides identified in the analysis of human plasma

Serum albumin E/NCDK(<sup>12</sup>Glu<sub>6</sub>)SLHTLFGDKLCTVATLRE/T [M+3H]<sup>3+</sup> 914.45 m/z

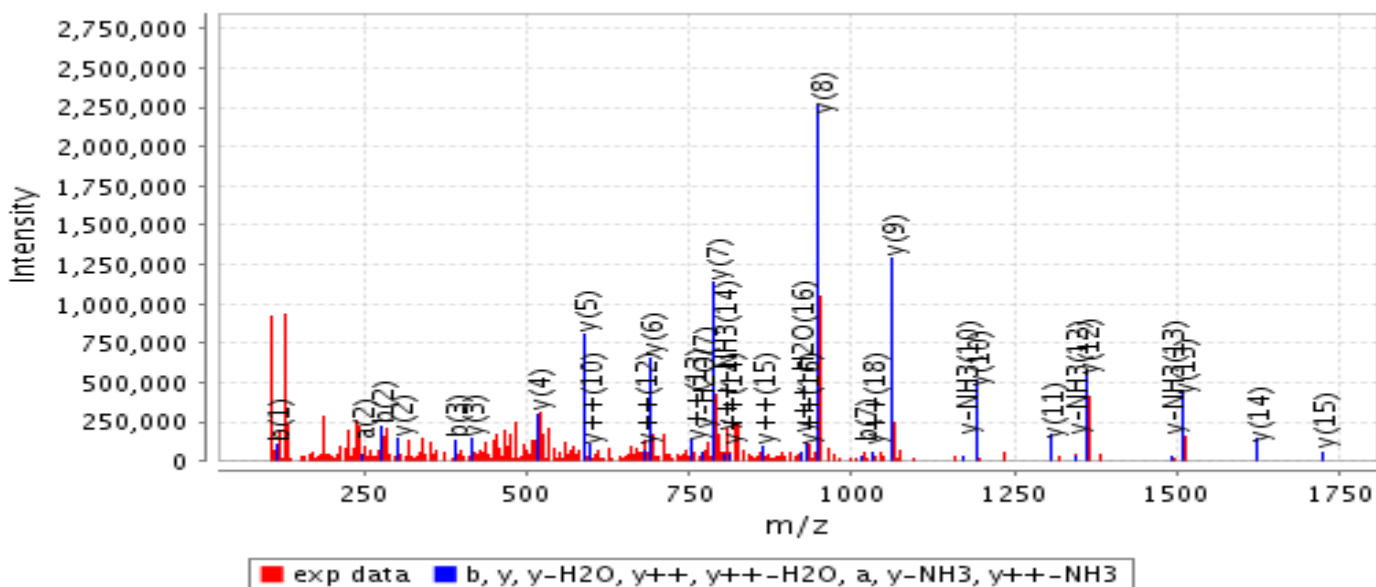

Serum albumin E/SAENCDKSLHTLFGDK(<sup>12</sup>Glu<sub>6</sub>)LCTVATLRE/T [M+3H]<sup>3+</sup> 1009.82 m/z

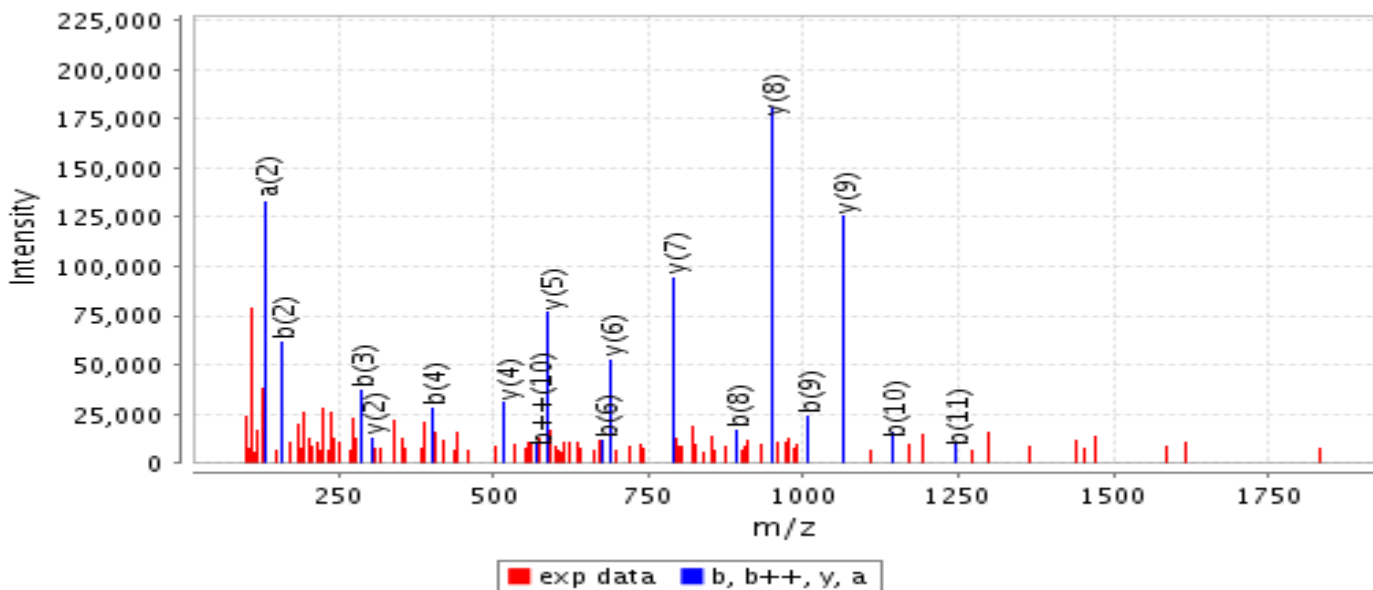

Serum albumin E/TYGEMADCCA**K**(<sup>12</sup>Glu<sub>6</sub>)QEPERNE/C

[M+3H]<sup>3+</sup> 783.98 m/z

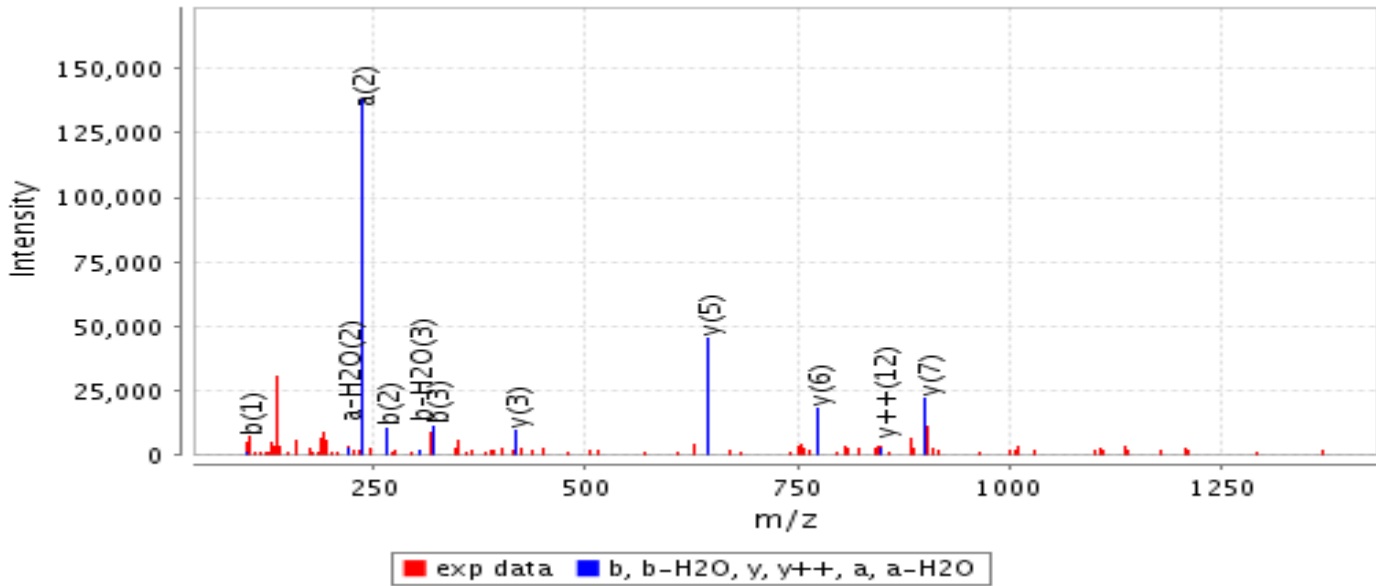

Serum albumin E/RNECF**LQHK**(<sup>12</sup>Glu<sub>6</sub>)DDNP**NLP**RLVRPE/V

[M+5H]<sup>5+</sup> 582.69 m/z

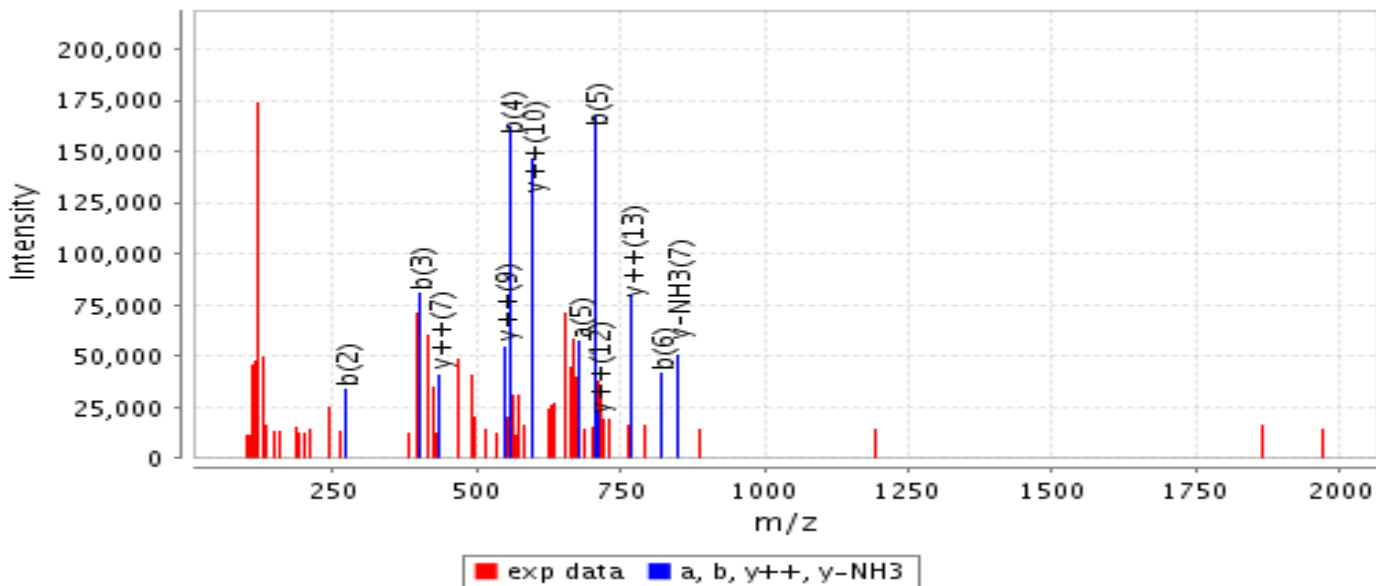

Serum albumin C/TAFHDNEETFLK(<sup>12</sup>Glu<sub>6</sub>)KYLYE/I [M+4H]<sup>4+</sup> 578.28 m/z

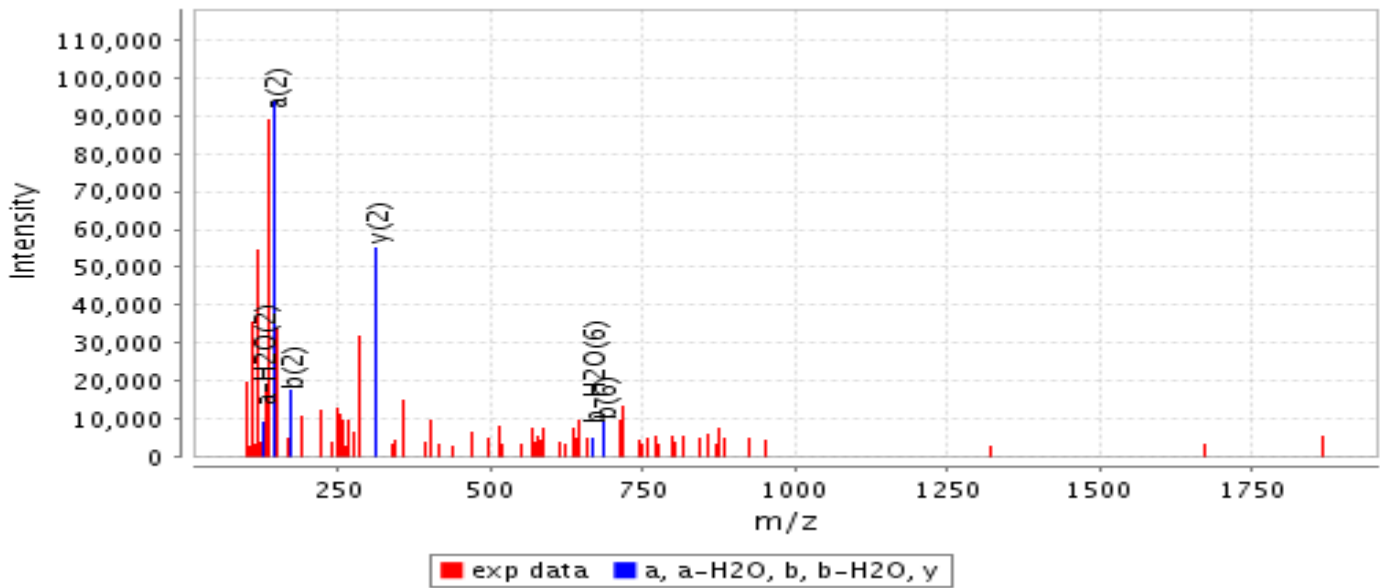

Serum albumin E/LLFFAK(<sup>12</sup>Glu<sub>6</sub>)RYKAAFTTECCQAADKAAACLLPKLDE/L [M+4H]<sup>4+</sup> 953.48 m/z

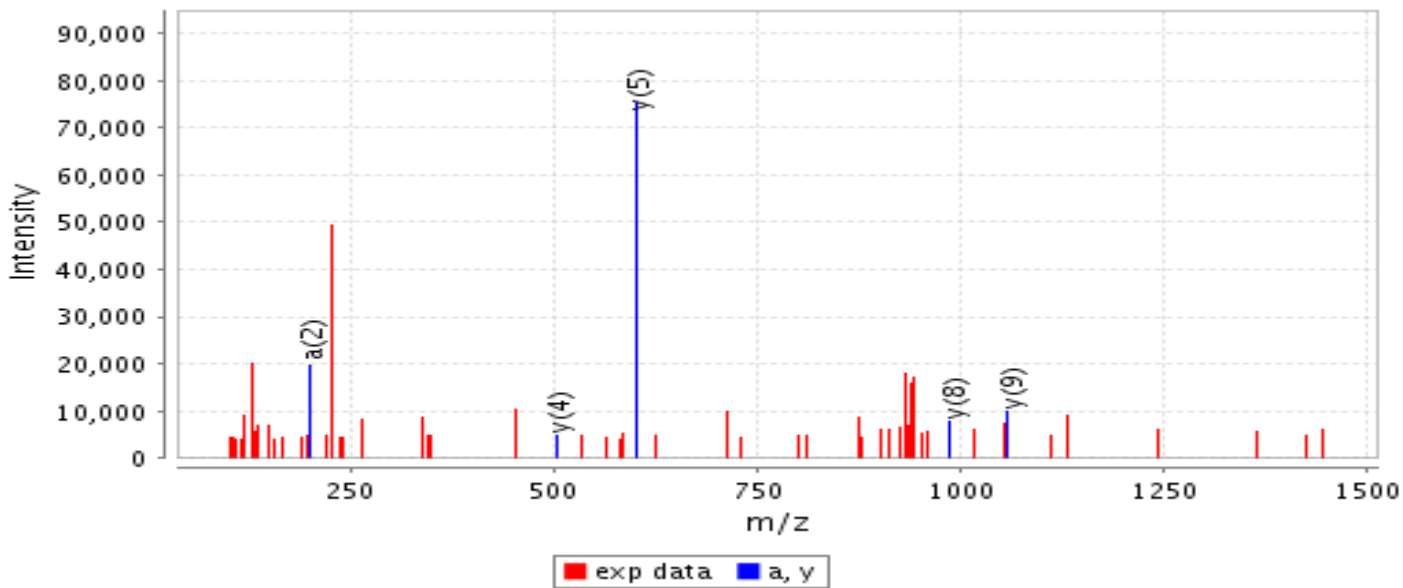

Serum albumin E/CCQAADK(<sup>12</sup>Glu<sub>6</sub>)AACLLPKLDE/L [M+3H]<sup>3+</sup> 708.99 m/z

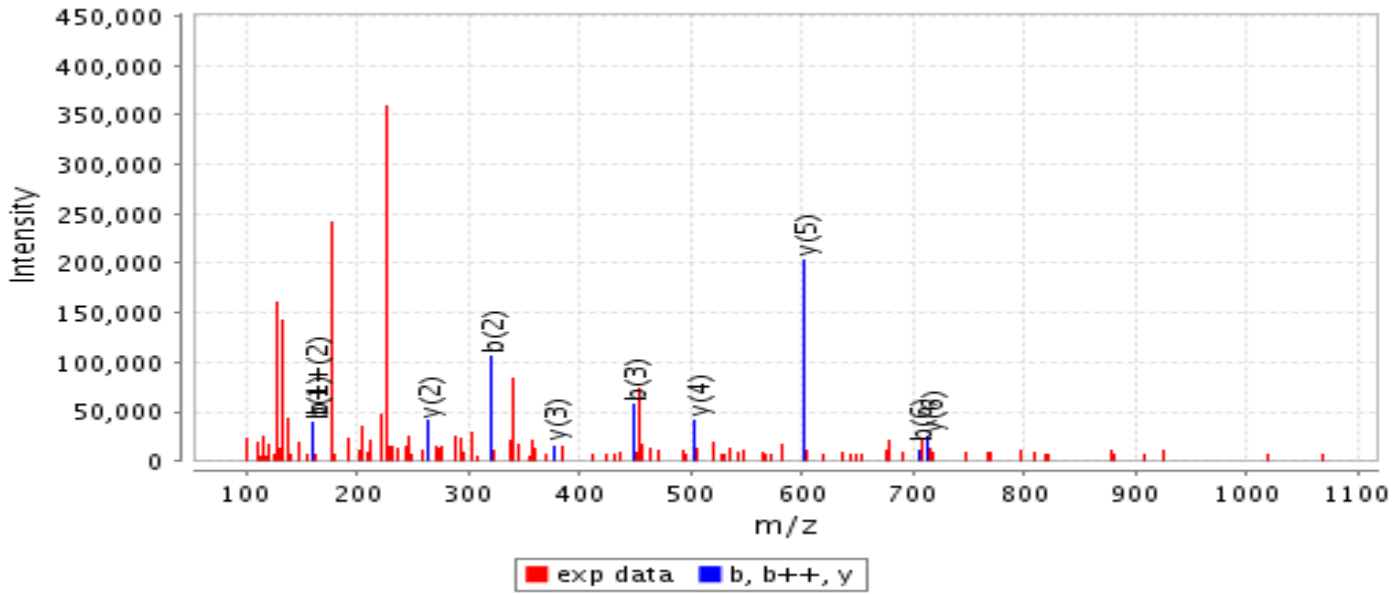

Serum albumin E/CCQAADKAACLLPK(<sup>12</sup>Glu<sub>6</sub>)LDELRLDE/G [M+3H]<sup>3+</sup> 880.08 m/z

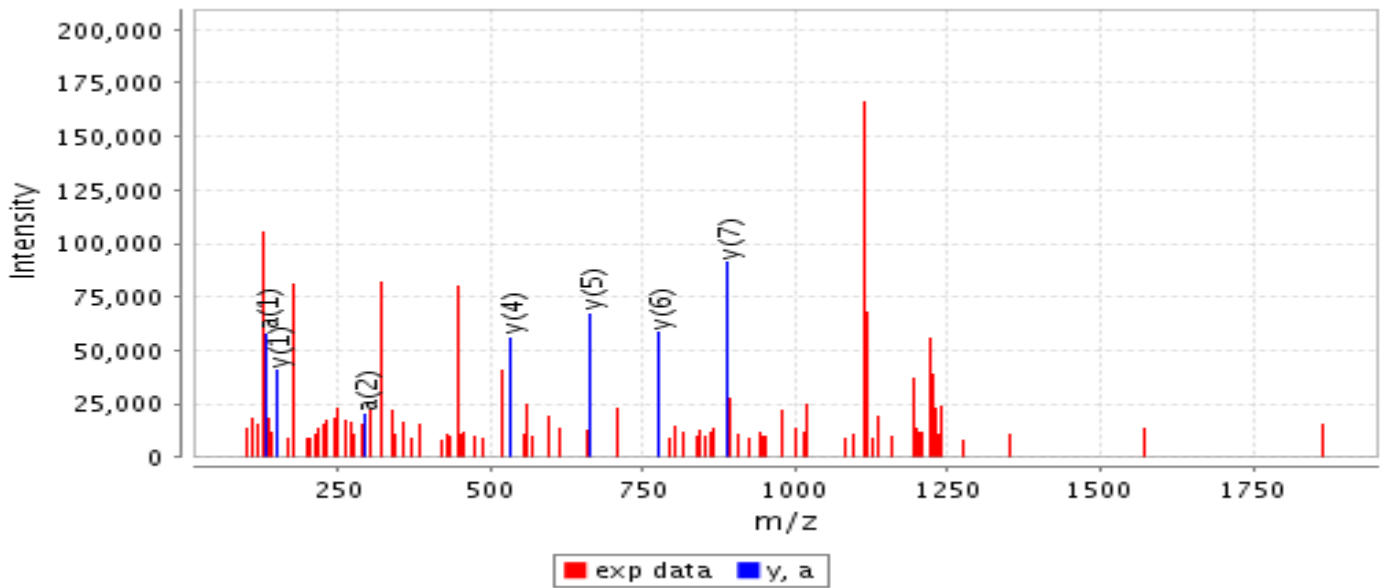

Serum albumin E/LRDEGKASSAK(<sup>12</sup>Glu<sub>6</sub>)QRLKCASLQKFGE/R [M+5H]<sup>5+</sup> 574.70 m/z

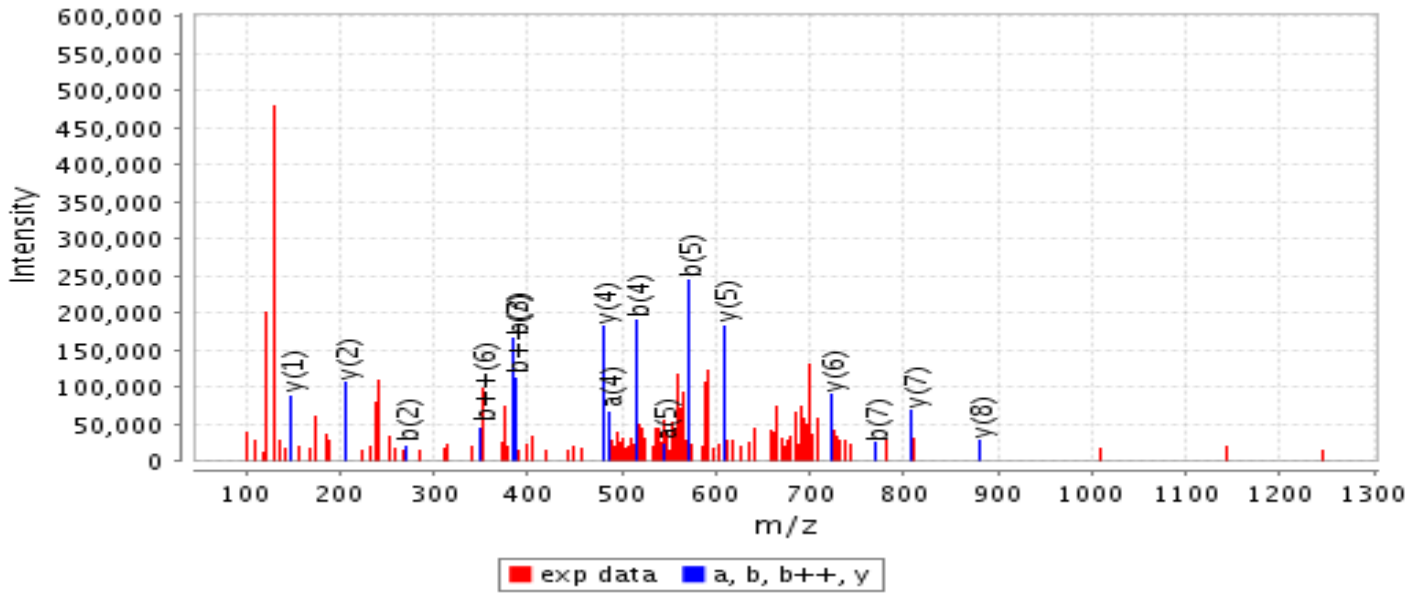

Serum albumin E/RAFKAWAVAR(<sup>13</sup>Glu<sub>6</sub>)LSQRFPAE/F [M+3H]<sup>3+</sup> 800.78 m/z

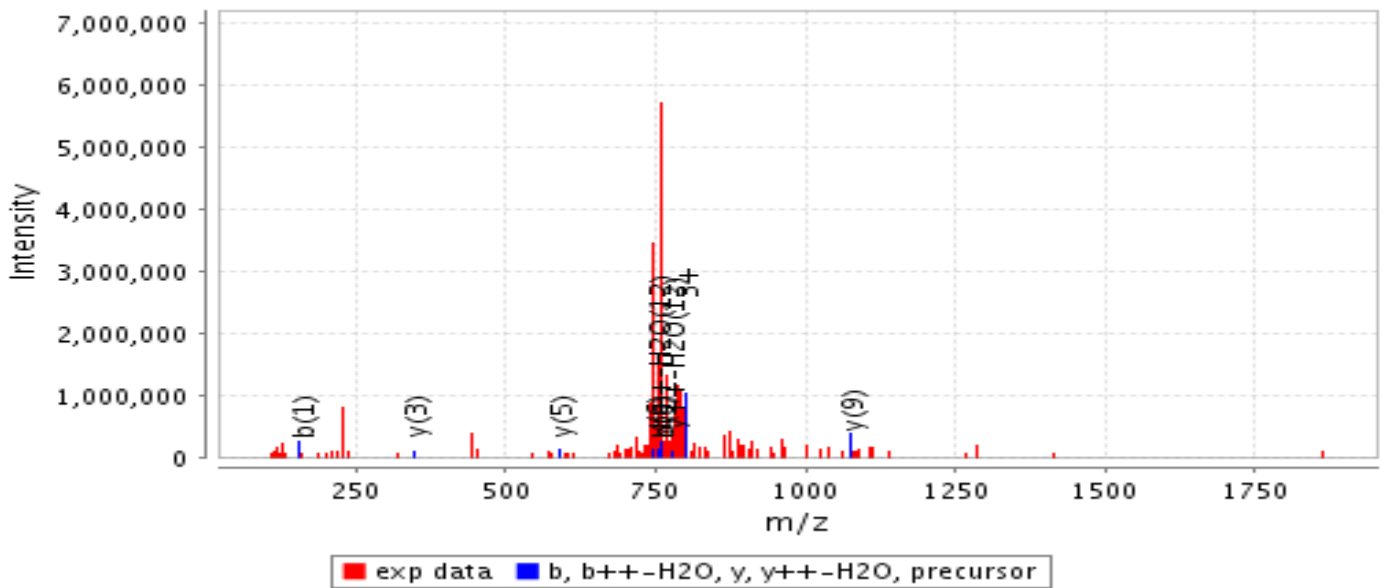

Serum albumin E/VSK(<sup>12</sup>Glu<sub>6</sub>)LVTDLTKVHTE/C [M+3H]<sup>3+</sup> 577.98 m/z

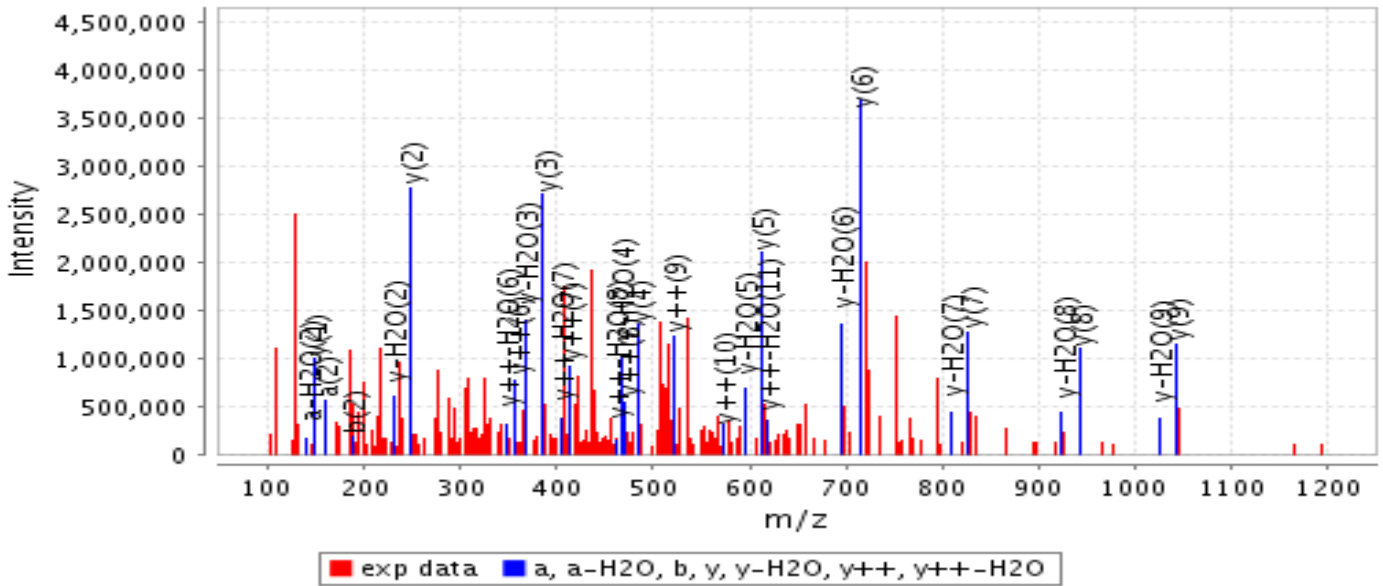

Serum albumin E/VSKLVTDLTK(<sup>12</sup>Glu<sub>6</sub>)VHTECCHGDLLE/C [M+3H]<sup>3+</sup> 906.08 m/z

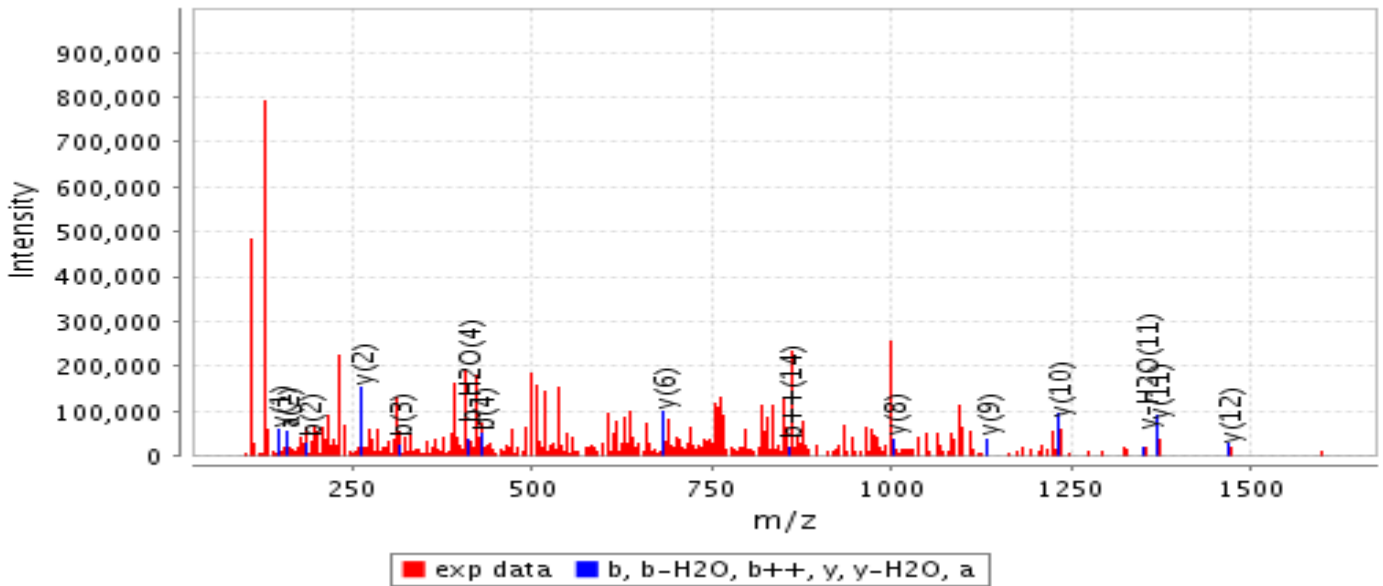

Serum albumin E/CADDRADLAK(<sup>12</sup>Glu<sub>6</sub>)YICE/N [M+2H]<sup>2+</sup> 931.40 m/z

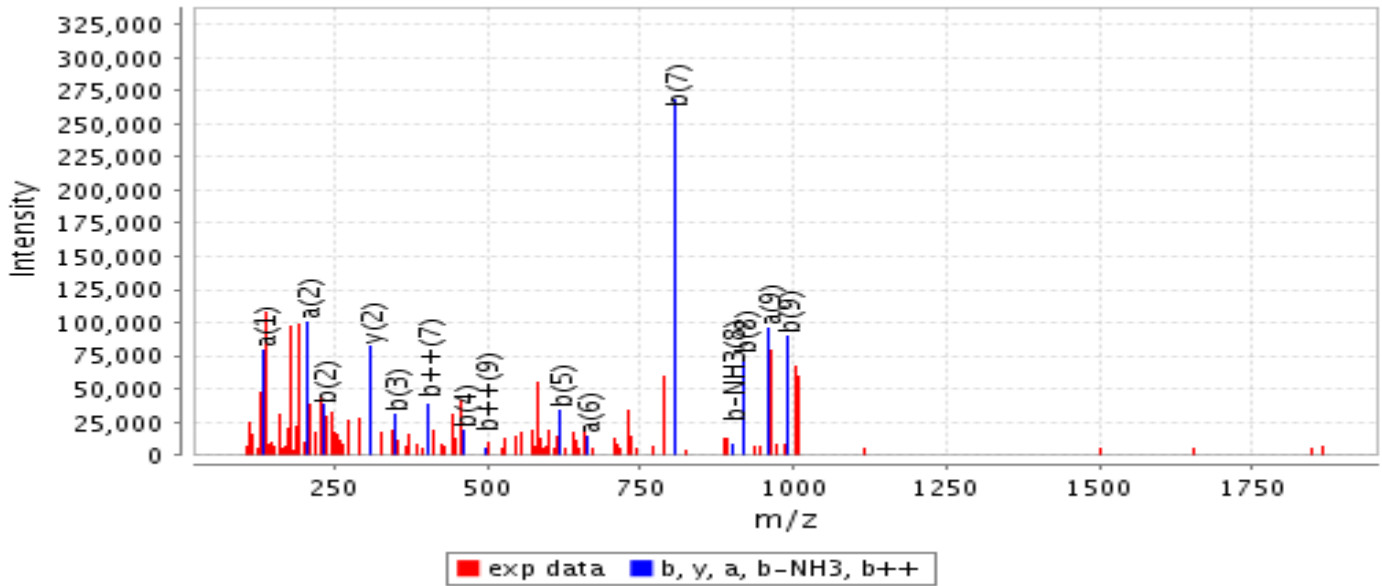

Serum albumin E/K(<sup>12</sup>Glu<sub>6</sub>)CCAAADPHECYAKVFDE/F [M+3H]<sup>3+</sup> 778.32 m/z

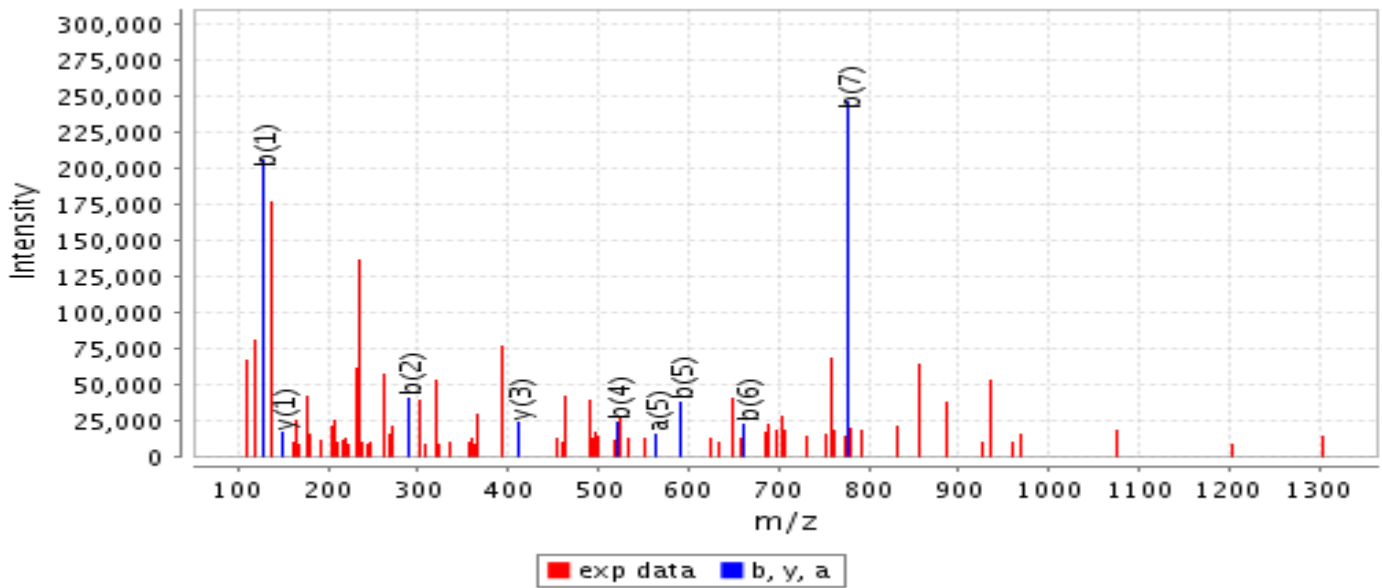

Serum albumin E/FK(<sup>12</sup>Glu<sub>6</sub>)PLVEEPQNLIKQNC/L [M+3H]<sup>3+</sup> 750.04 m/z

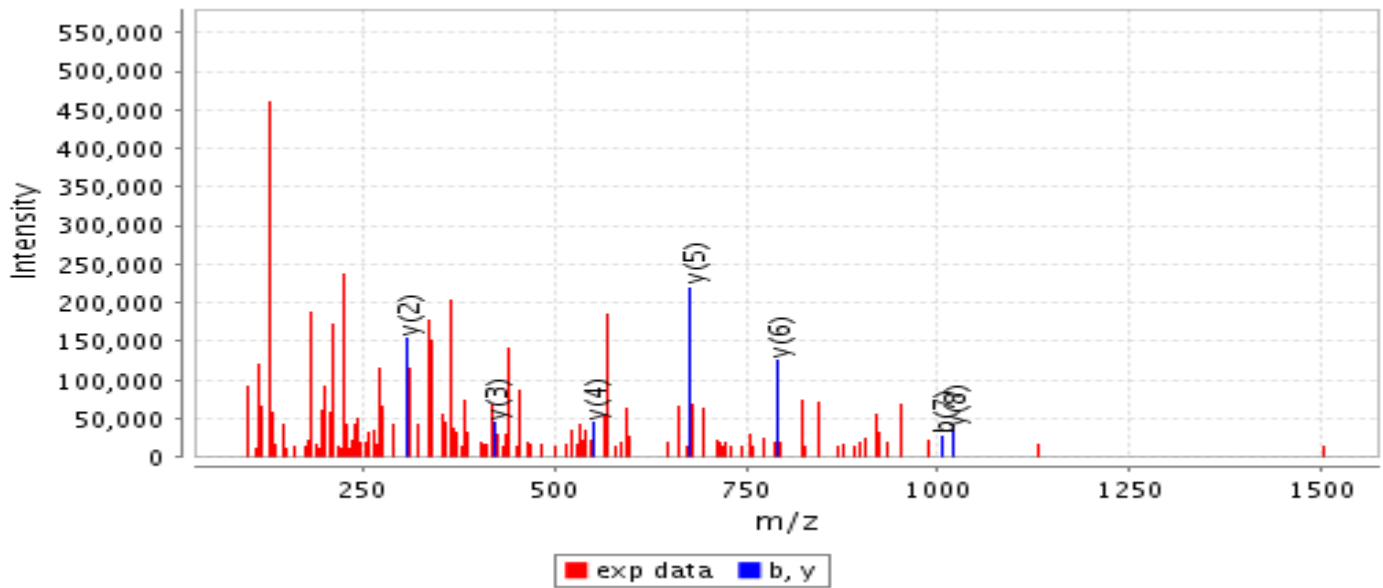

Serum albumin E/FKPLVEEPQNLIK(<sup>12</sup>Glu<sub>6</sub>)QNC/L [M+3H]<sup>3+</sup> 750.04 m/z

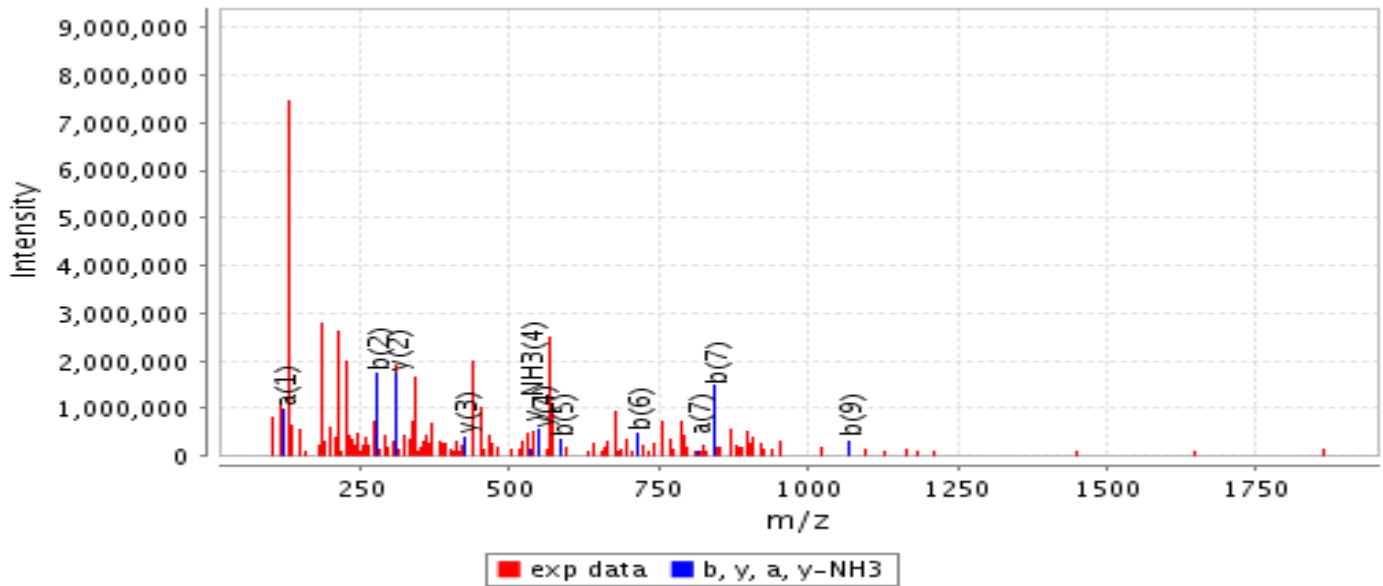



Serum albumin Q/NALLVRYTKK(<sup>13</sup>Glu<sub>6</sub>)VPQVSTPTLVE/V [M+2H]<sup>2+</sup> 1262.72 m/z

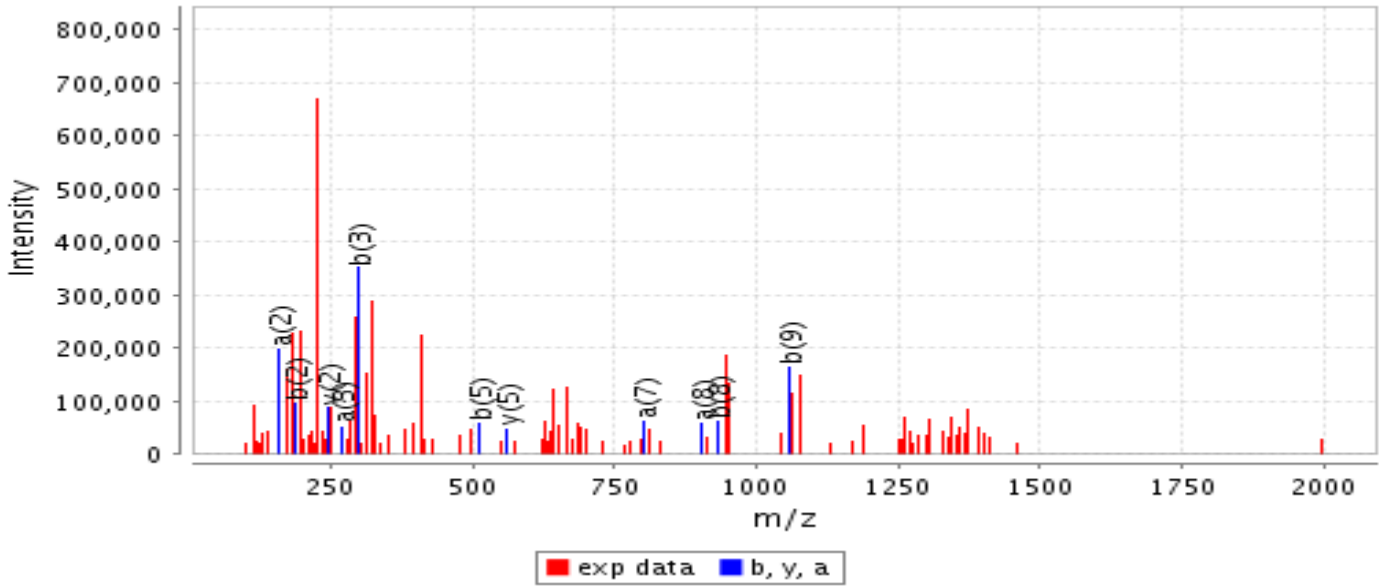

Serum albumin E/VSRNLGK(<sup>12</sup>Glu<sub>6</sub>)VGSKCCKHPE/A [M+4H]<sup>4+</sup> 530.26 m/z

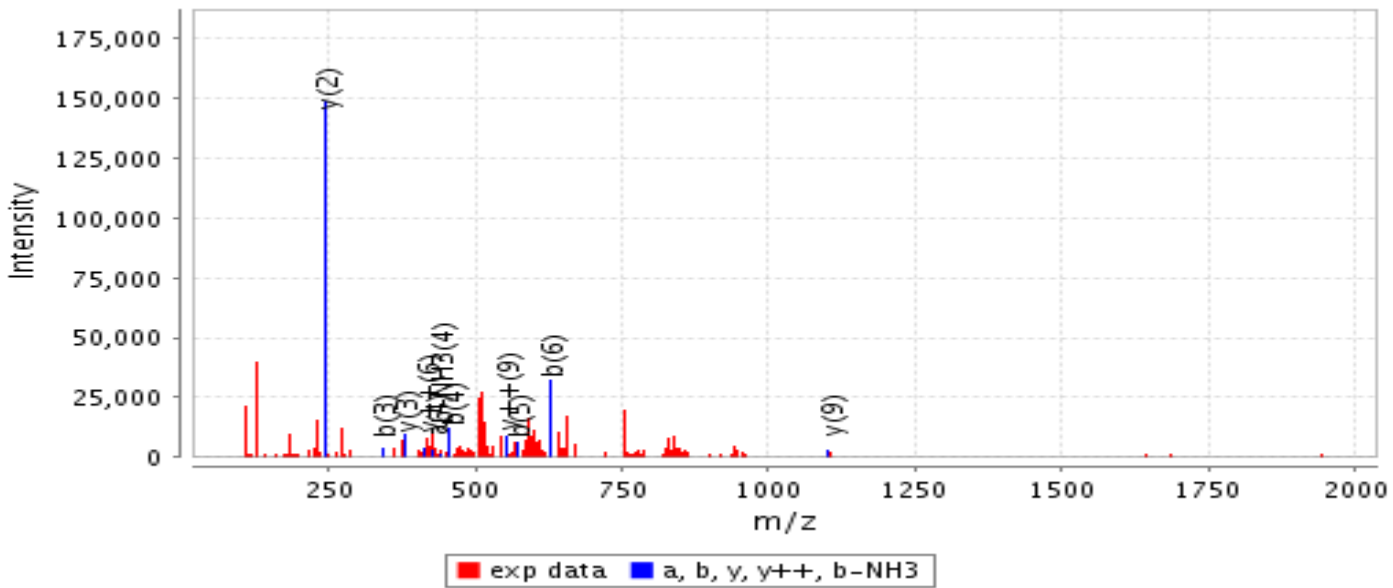

Serum albumin E/VSRNLGKVGSK(<sup>12</sup>Glu<sub>6</sub>)CCKHPE/A [M+4H]<sup>4+</sup> 530.26 m/z

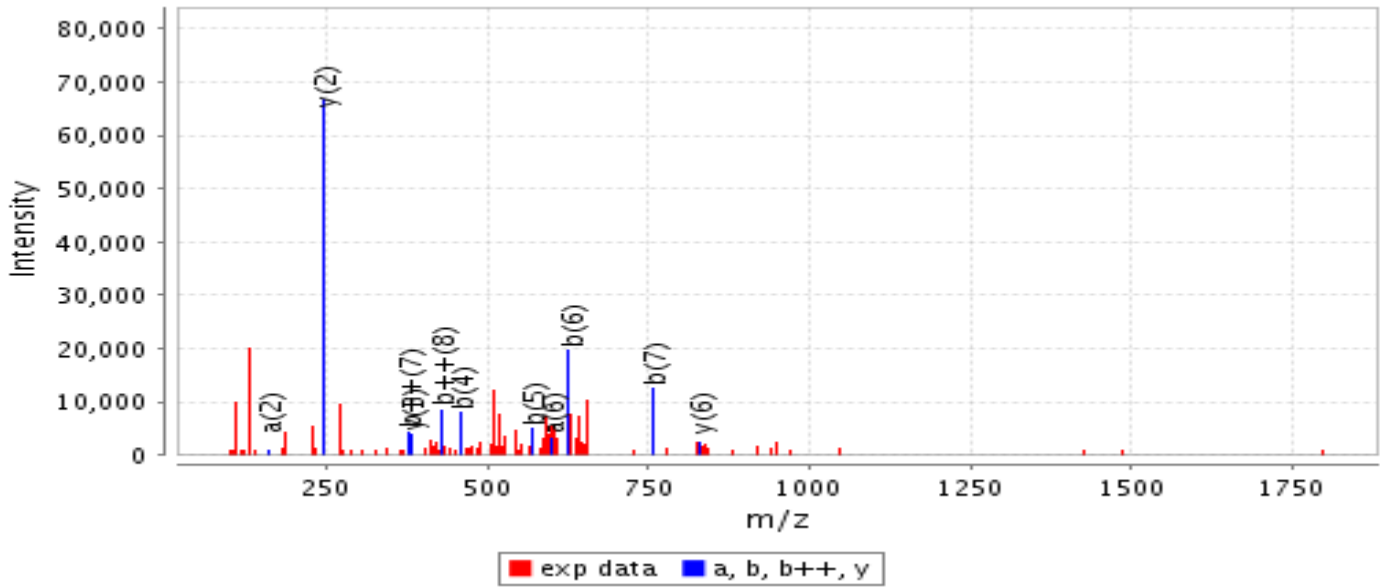

Serum albumin E/VSRNLGKVGSKCCK(<sup>12</sup>Glu<sub>6</sub>)HPE/A [M+4H]<sup>4+</sup> 530.26 m/z

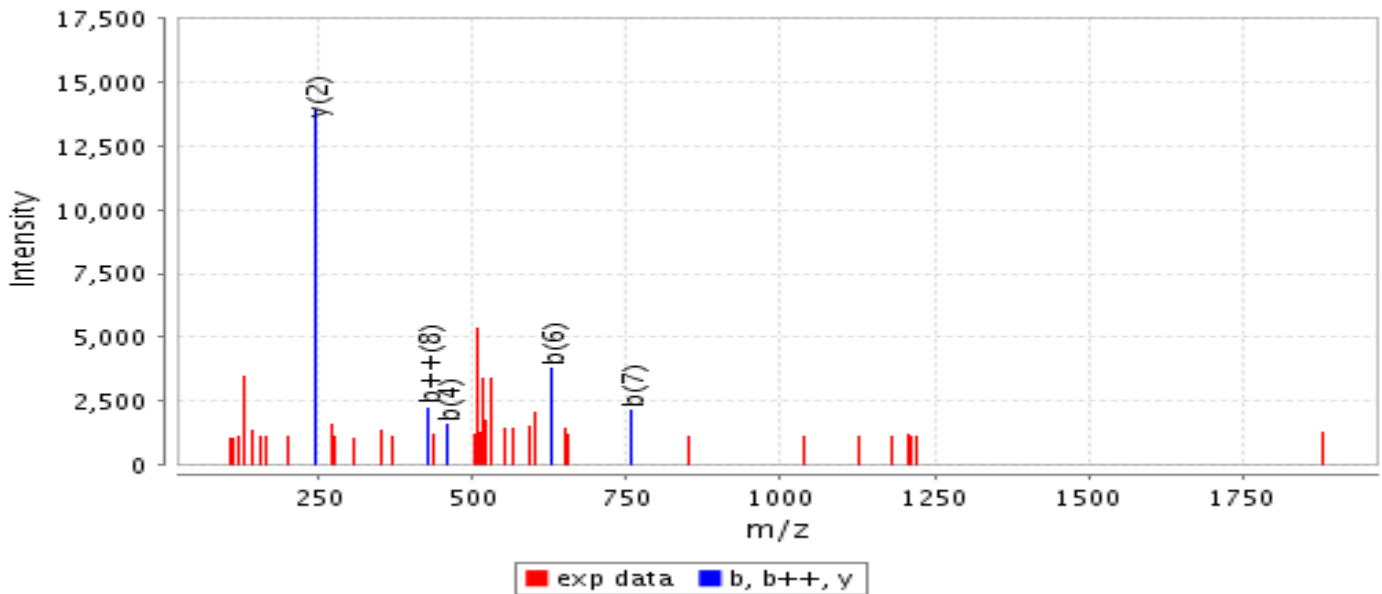

Serum albumin H/PEAK(<sup>12</sup>Glu<sub>6</sub>)RMPCAEDYLSVVLNQLCVLHE/K [M+3H]<sup>3+</sup> 1050.94 m/z

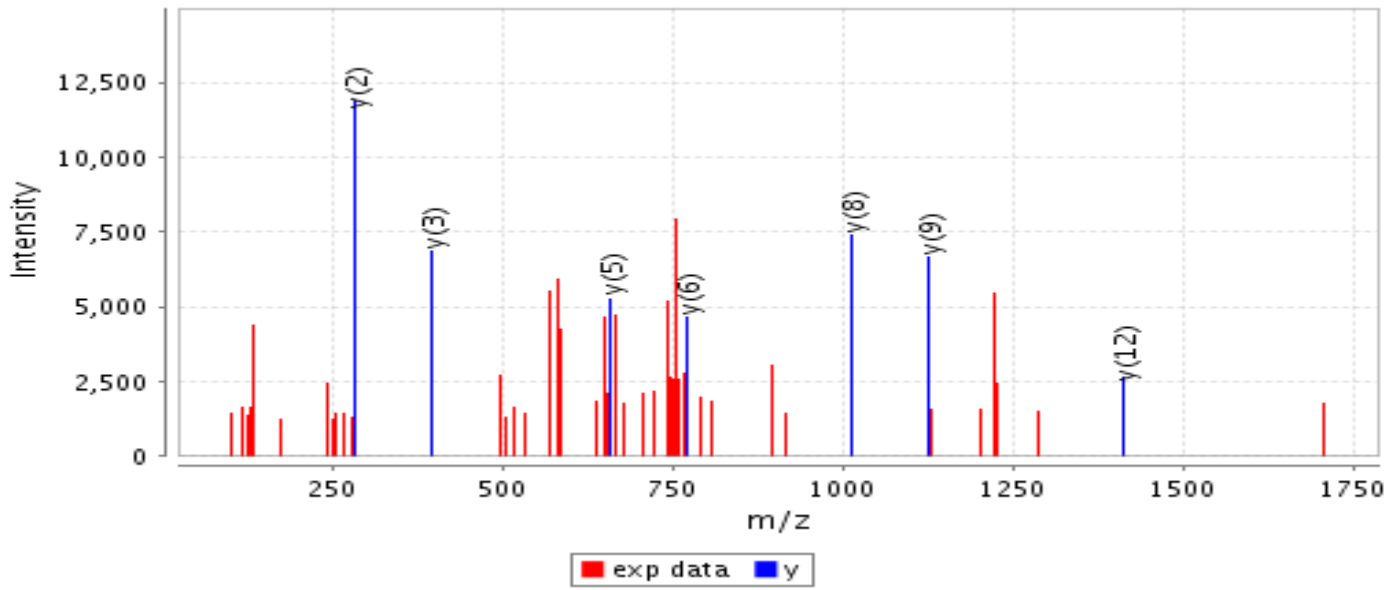

Serum albumin E/KTPVSDR(<sup>13</sup>Glu<sub>6</sub>)VTKCCTE/S [M+3H]<sup>3+</sup> 616.96 m/z

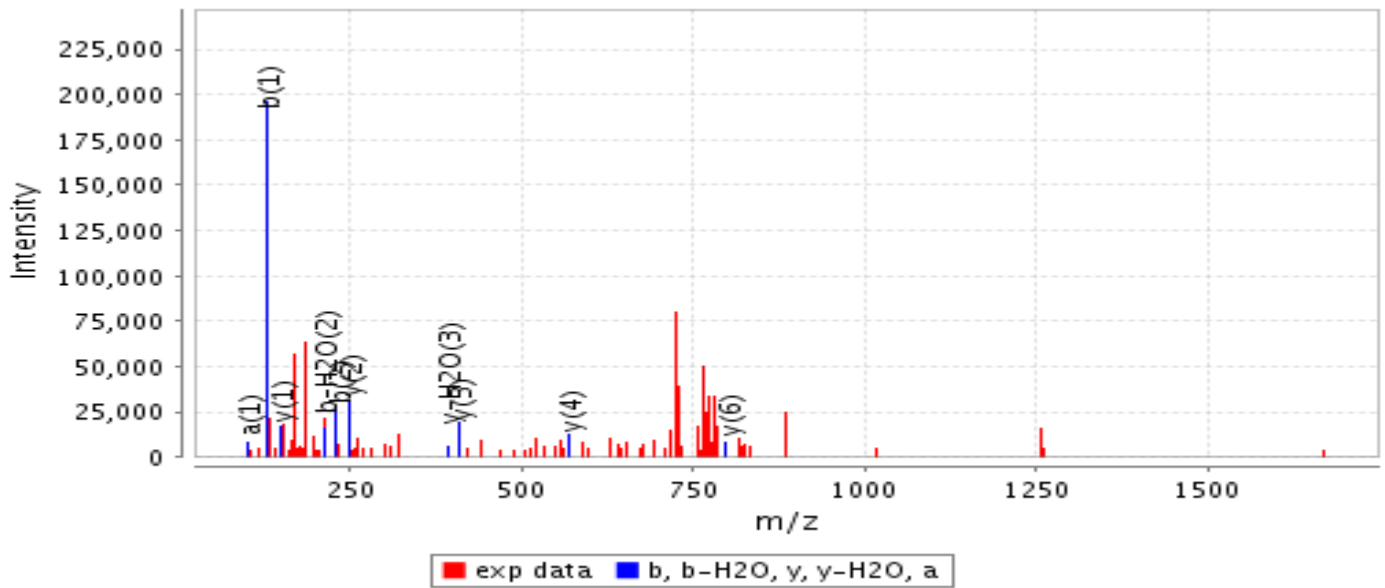

Serum albumin E/KTPVSDRVTK(<sup>13</sup>Glu<sub>6</sub>)CCTE/S [M+3H]<sup>3+</sup> 616.96 m/z

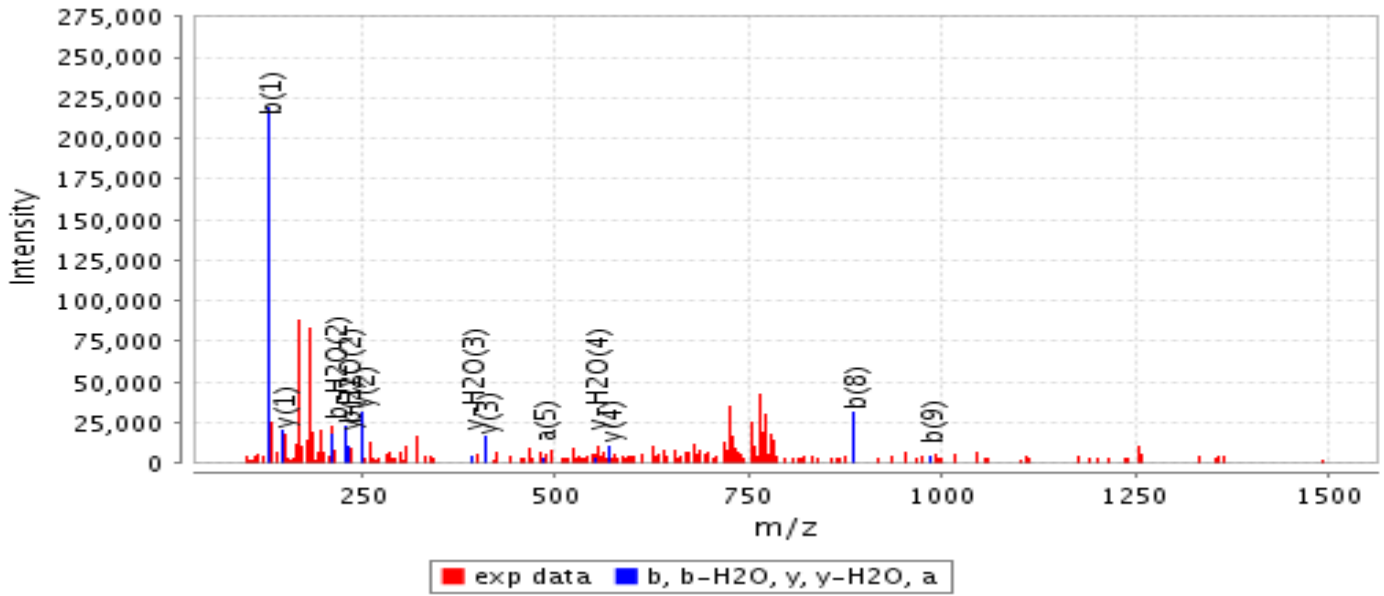

Serum albumin E/SLVNRPCFSALEVDETYVPK(<sup>12</sup>Glu<sub>6</sub>)EFNAE/T [M+5H]<sup>5+</sup> 708.99 m/z

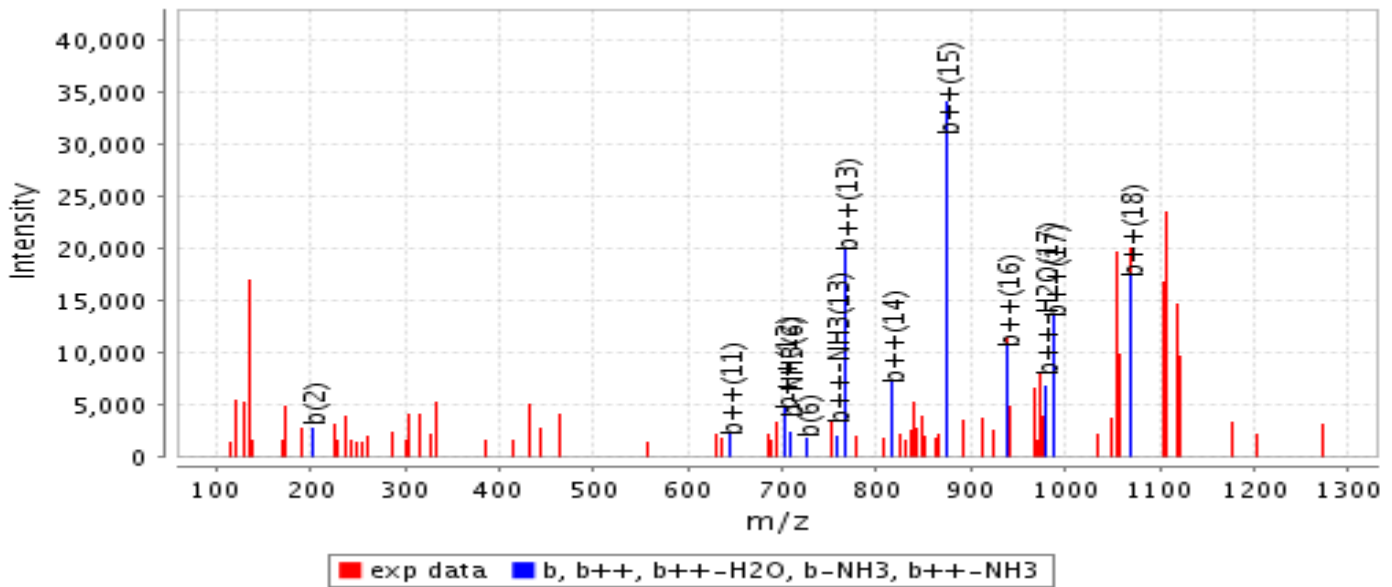

Serum albumin E/TFTFHADICTLSEK(<sup>12</sup>Glu<sub>6</sub>)E/R [M+3H]<sup>3+</sup> 654.30 m/z

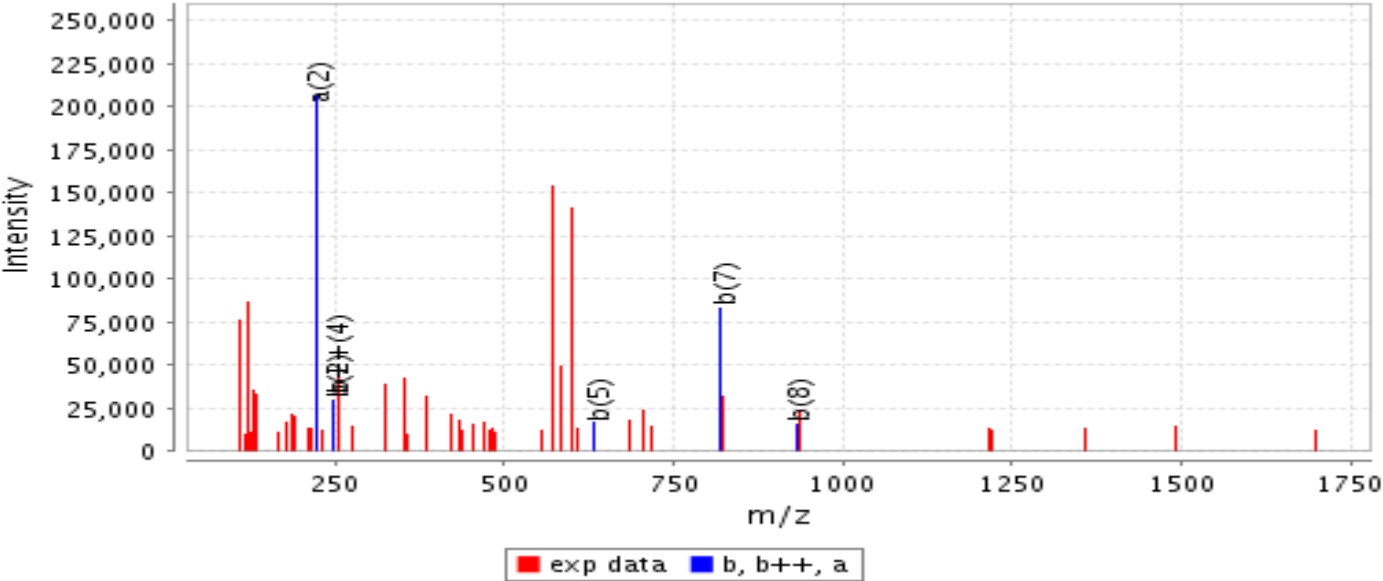

Serotransferrin E/YKDCHLAQVPSHTVVARSMGGK(<sup>13</sup>Glu<sub>6</sub>)EDLIWE/L [M+3H]<sup>3+</sup> 1132.22 m/z

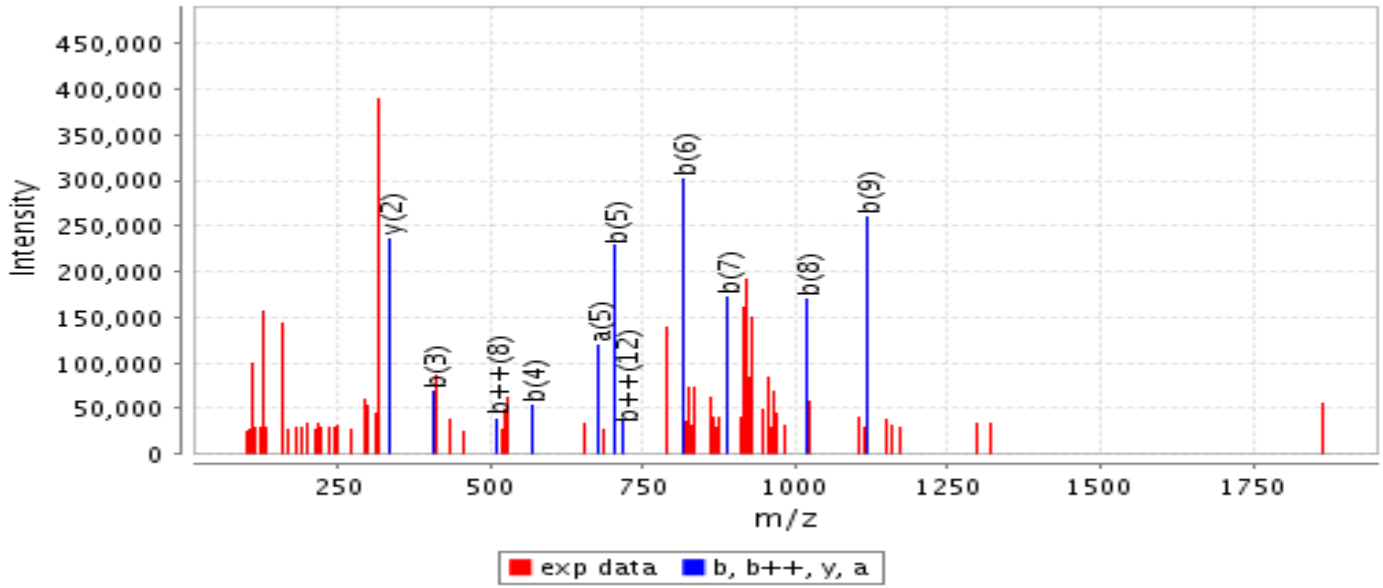

Serotransferrin E/CK(<sup>13</sup>Glu<sub>6</sub>)PVKWCALSHHE/R [M+4H]<sup>4+</sup> 455.72 m/z

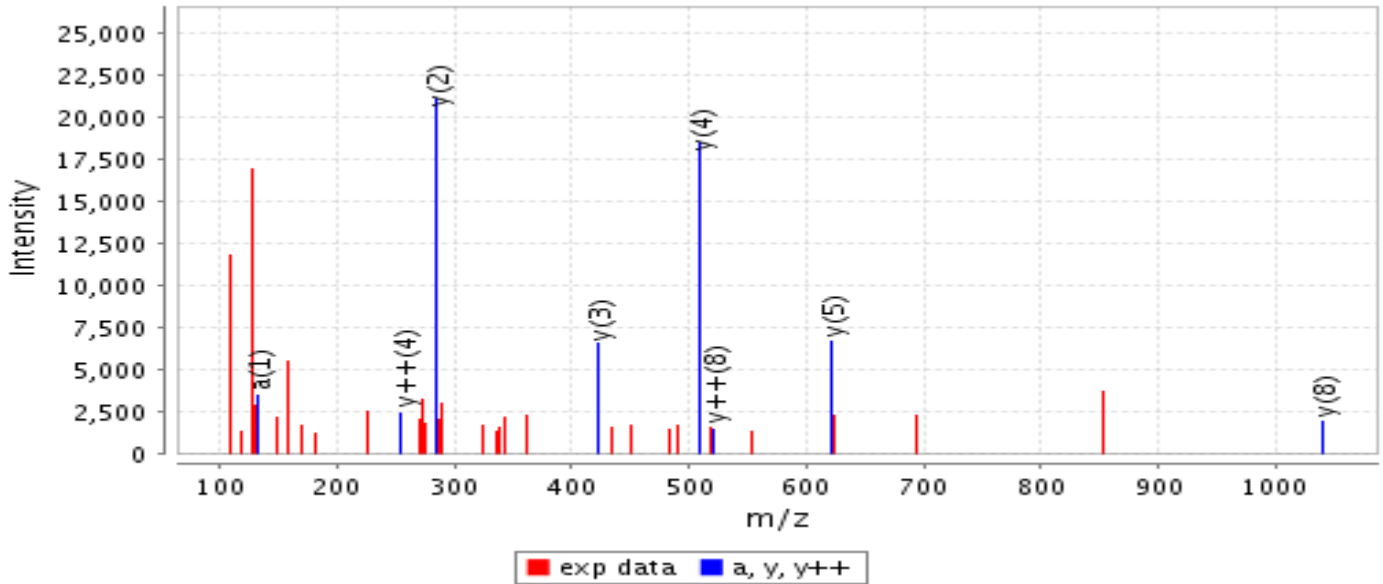

Serotransferrin E/RLKCDEWSVNSVGK(<sup>12</sup>Glu<sub>6</sub>)IE/C [M+3H]<sup>3+</sup> 814.03 m/z

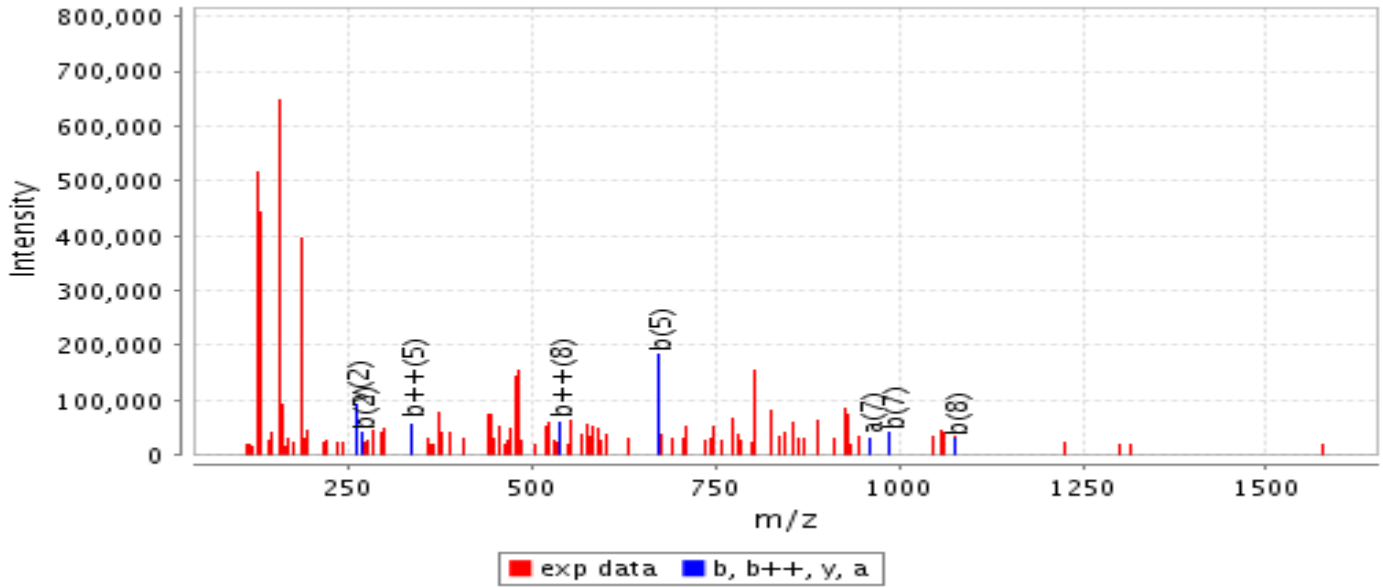

Serotransferrin E/FFSEGCAPGSK(<sup>13</sup>Glu<sub>6</sub>)KDSSLCKLC/M [M+3H]<sup>3+</sup> 816.04 m/z

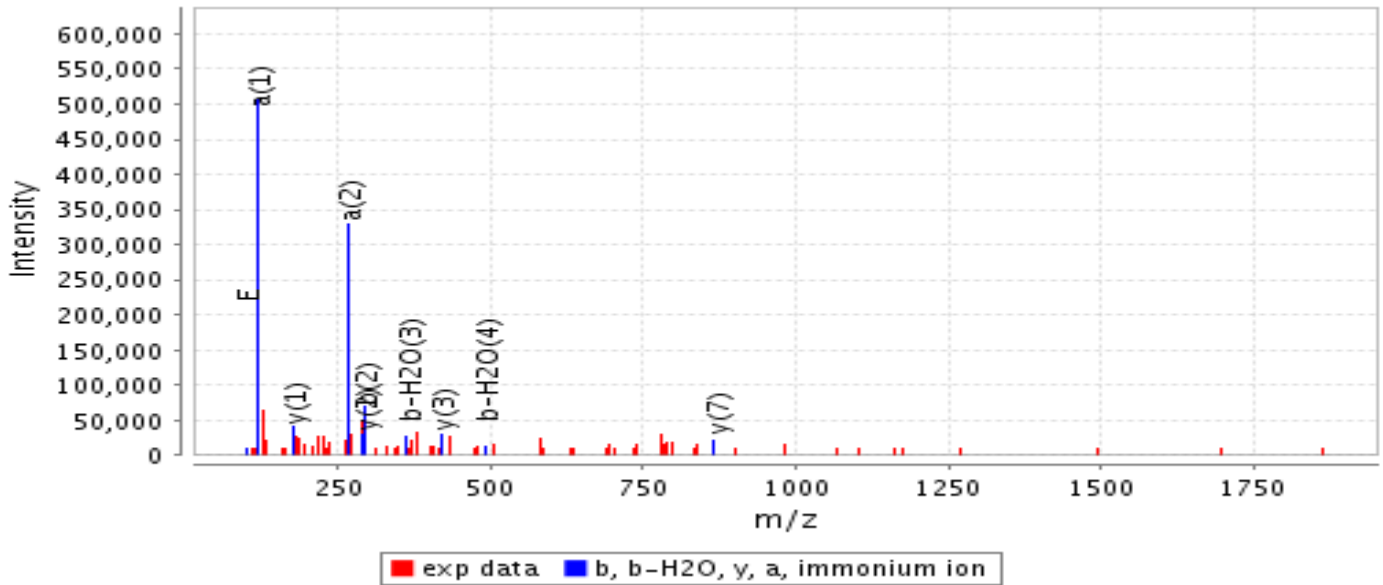

Serotransferrin E/GCAPGSKKDSSLCK(<sup>13</sup>Glu<sub>6</sub>)LCMGSGNLNCEPNNKE/G [M+4H]<sup>4+</sup> 870.65 m/z

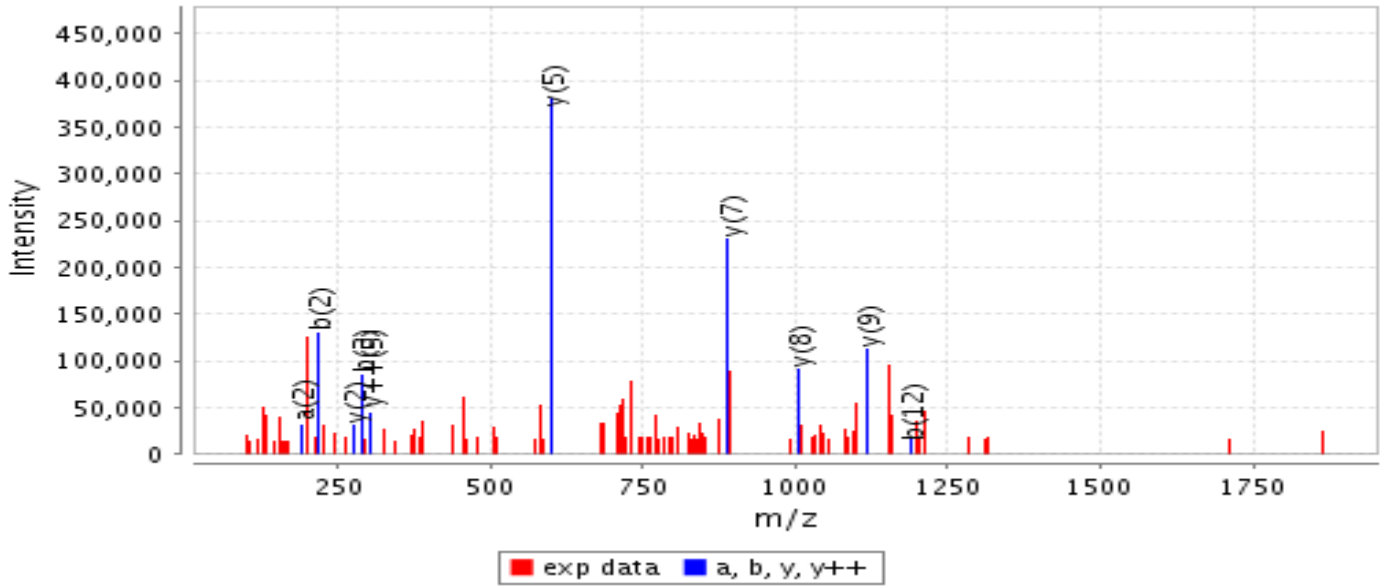

Serotransferrin E/KGDVAFVK(<sup>13</sup>Glu<sub>6</sub>)HQTVPQNTGGKN/P [M+4H]<sup>4+</sup> 574.05 m/z

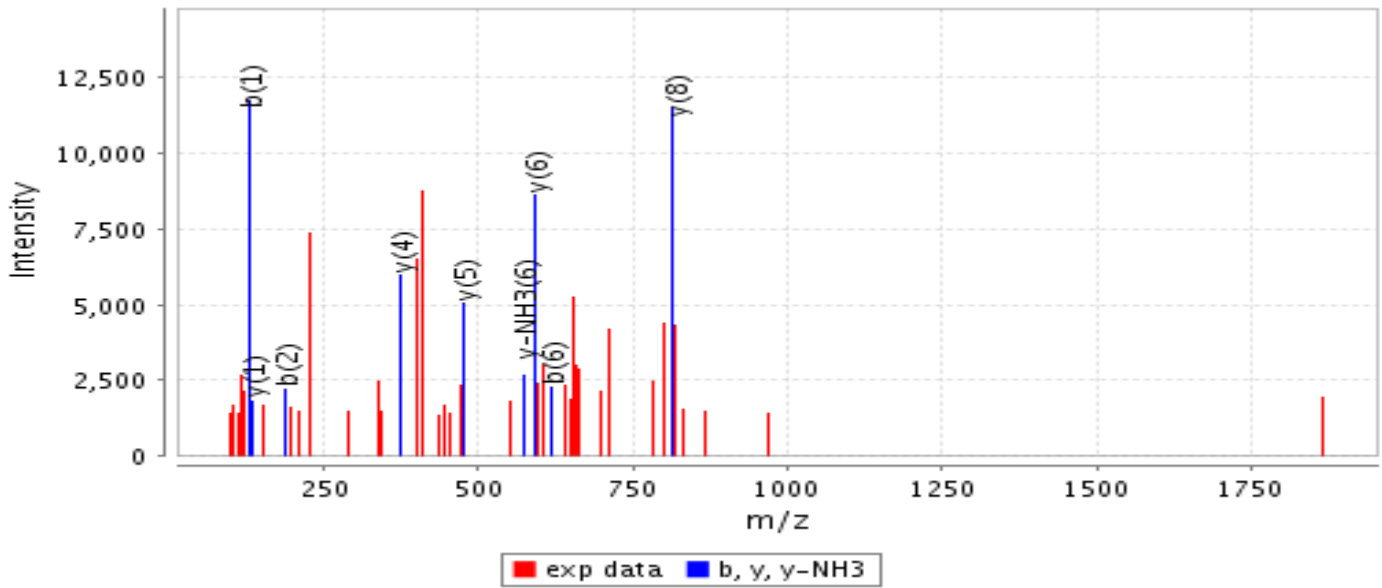



Serotransferrin E/KGDVAFVKHQTVPQNTGGK(<sup>12</sup>Glu<sub>6</sub>)NPDPWAKN/L [M+4H]<sup>4+</sup> 774.64 m/z

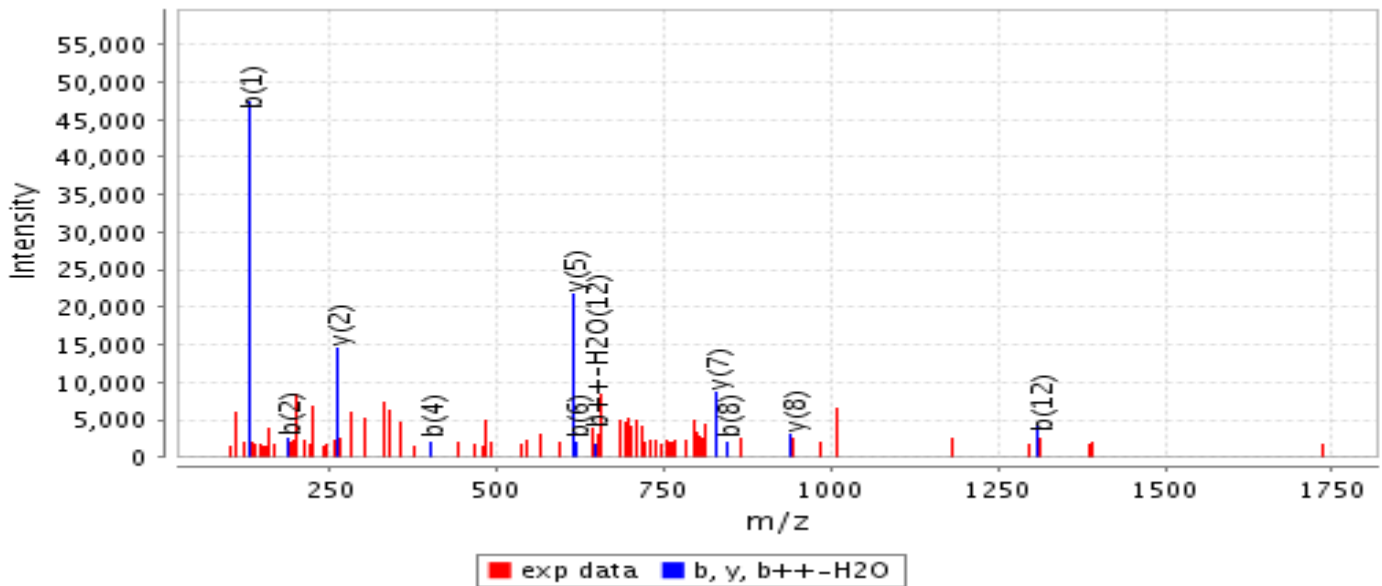

Apolipoprotein A-I E/GSALGKQLNLK(<sup>13</sup>Glu<sub>6</sub>)LLDNWDSVTSTFSKLR/Q [M+4H]<sup>4+</sup> 822.94 m/z

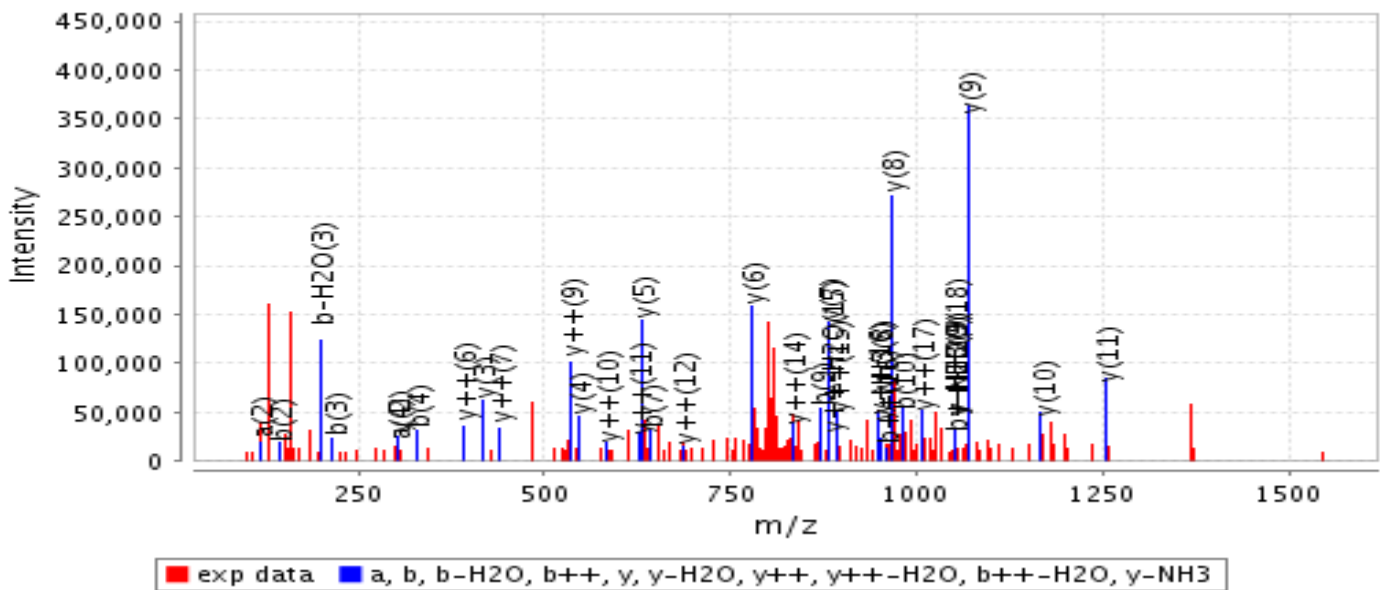

Apolipoprotein A-I E/VKAKVQPYLDDFQK(<sup>13</sup>Glu<sub>6</sub>)KWQEE/M [M+4H]<sup>4+</sup> 637.58 m/z

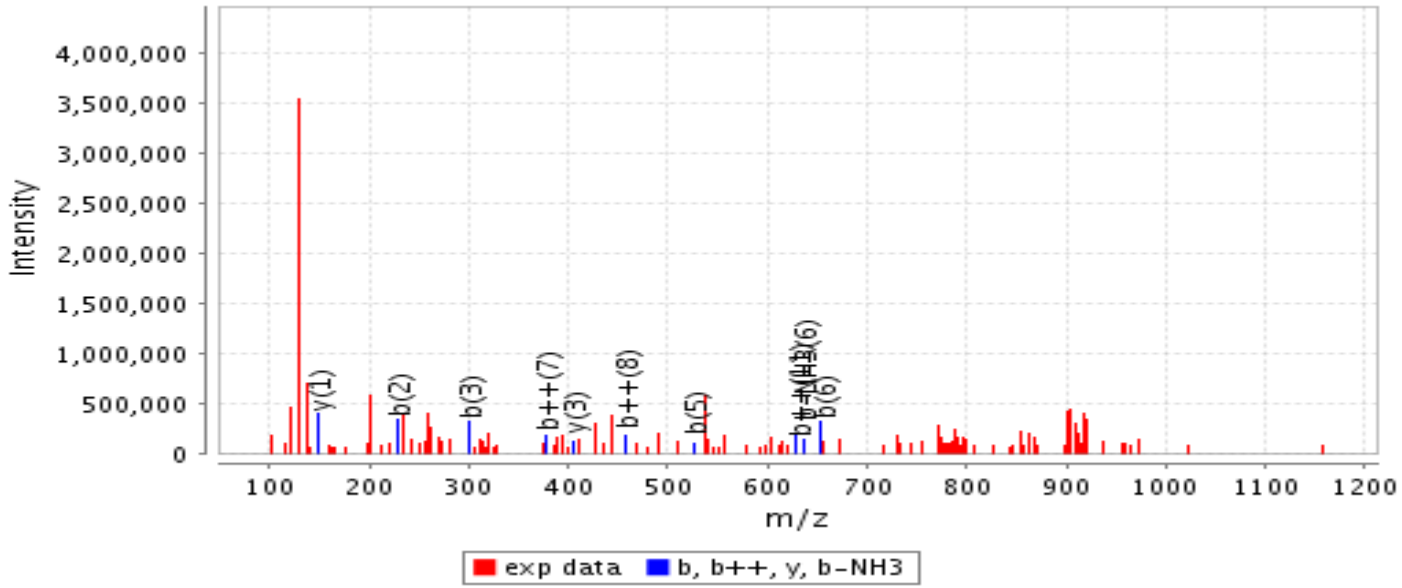

Apolipoprotein A-I E/MELYR<sup>13</sup>Glu<sub>6</sub>)QKVEPLRAE/L [M+4H]<sup>4+</sup> 483.26 m/z

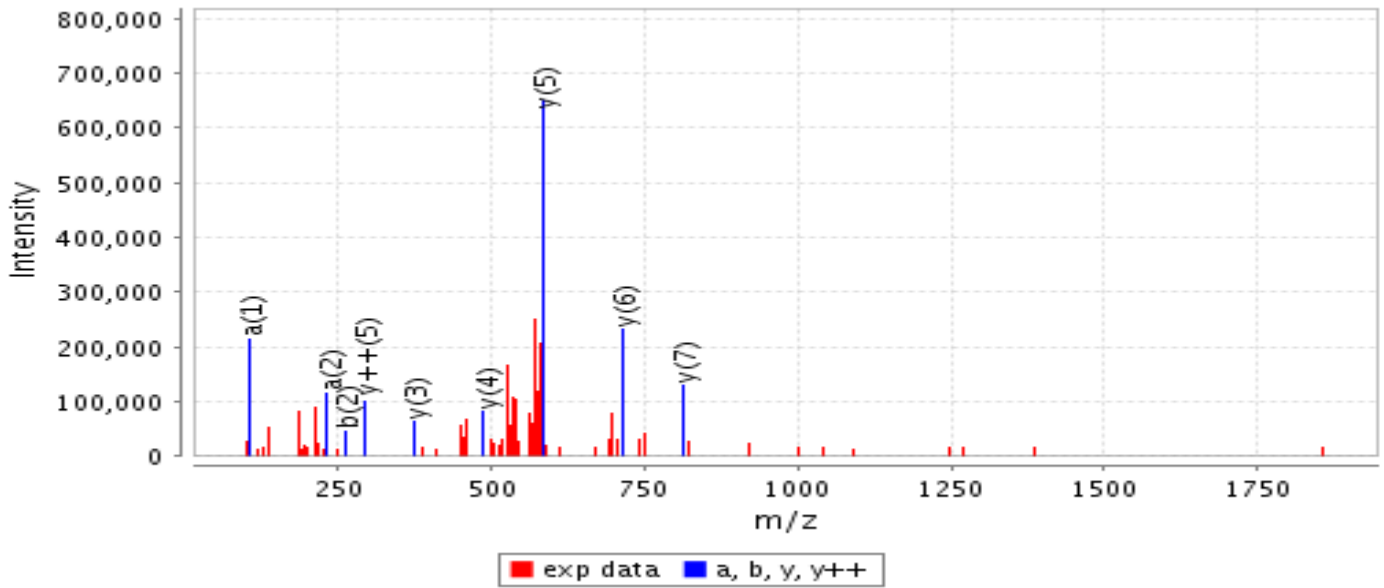

Haptoglobin  $\beta$  chain K/KQWINK( $^{12}\text{Glu}_6$ )AVGDKLPE/C [M+4H] $^{4+}$  447.74 m/z

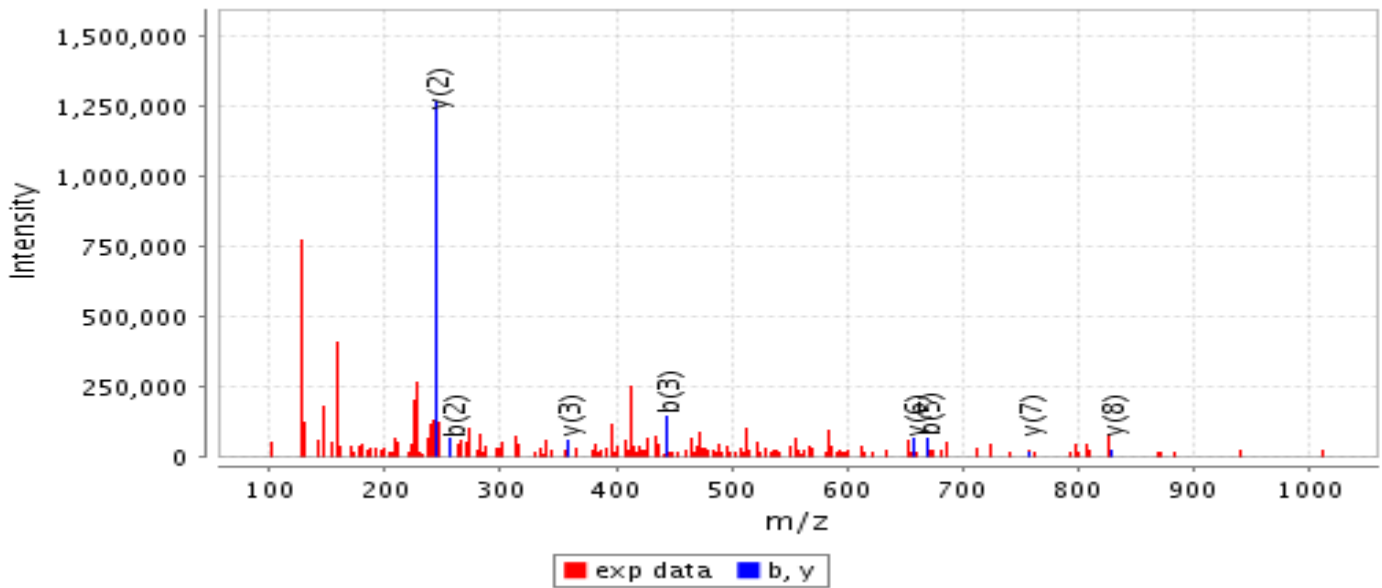

Haptoglobin  $\beta$  chain E/KQWINKAVGDK( $^{12}\text{Glu}_6$ )LPECE/A [M+3H] $^{3+}$  693.01 m/z

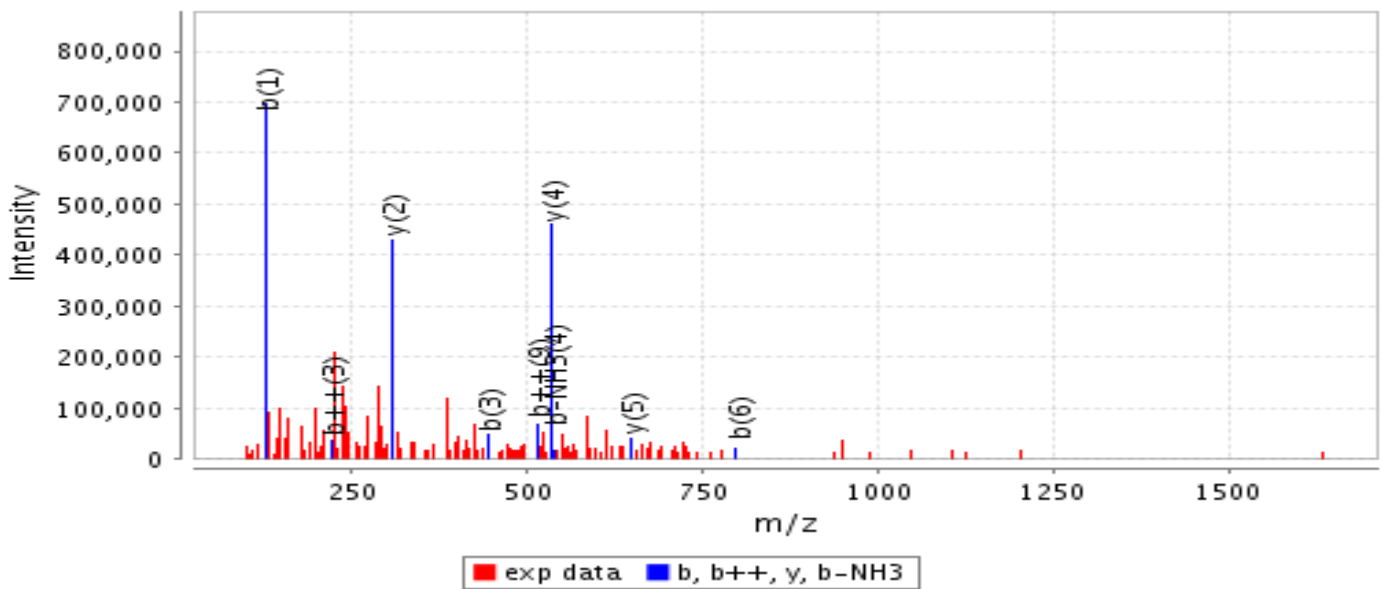

Haptoglobin  $\beta$  chain E/AVCGK(<sup>12</sup>Glu<sub>6</sub>)PKNPANPVQR/I [M+4H]<sup>4+</sup> 450.24 m/z

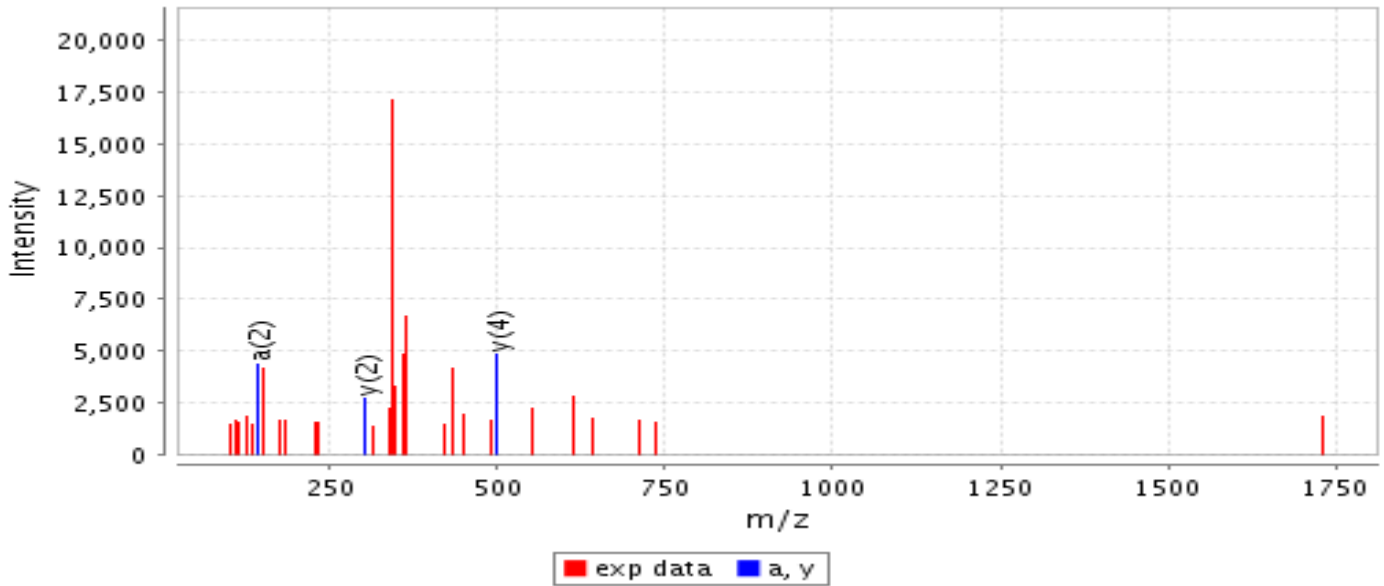

$\alpha$ -1-antitrypsin E/EAPLK(<sup>12</sup>Glu<sub>6</sub>)LSKAVHKAVLTIDEKGTE/A [M+3H]<sup>3+</sup> 880.49 m/z

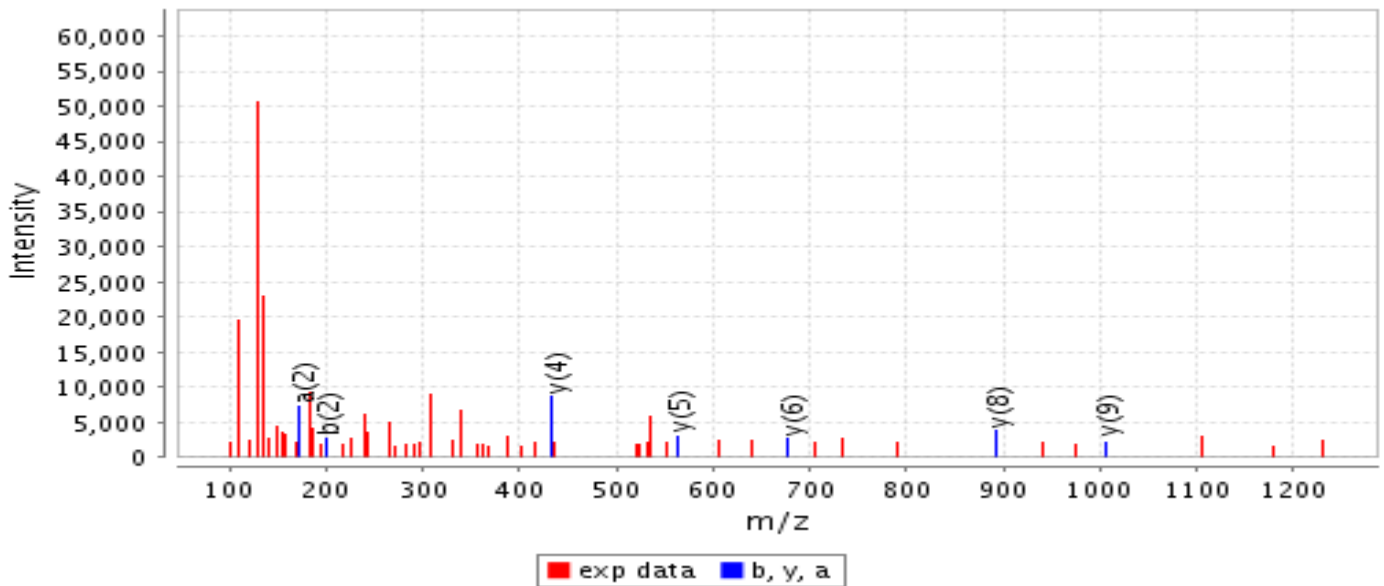

$\alpha$ -1-antitrypsin E/EAPLKLSK(<sup>12</sup>Glu<sub>6</sub>)AVHKAVLTIDEKGTGTE/A [M+3H]<sup>3+</sup> 880.49 m/z

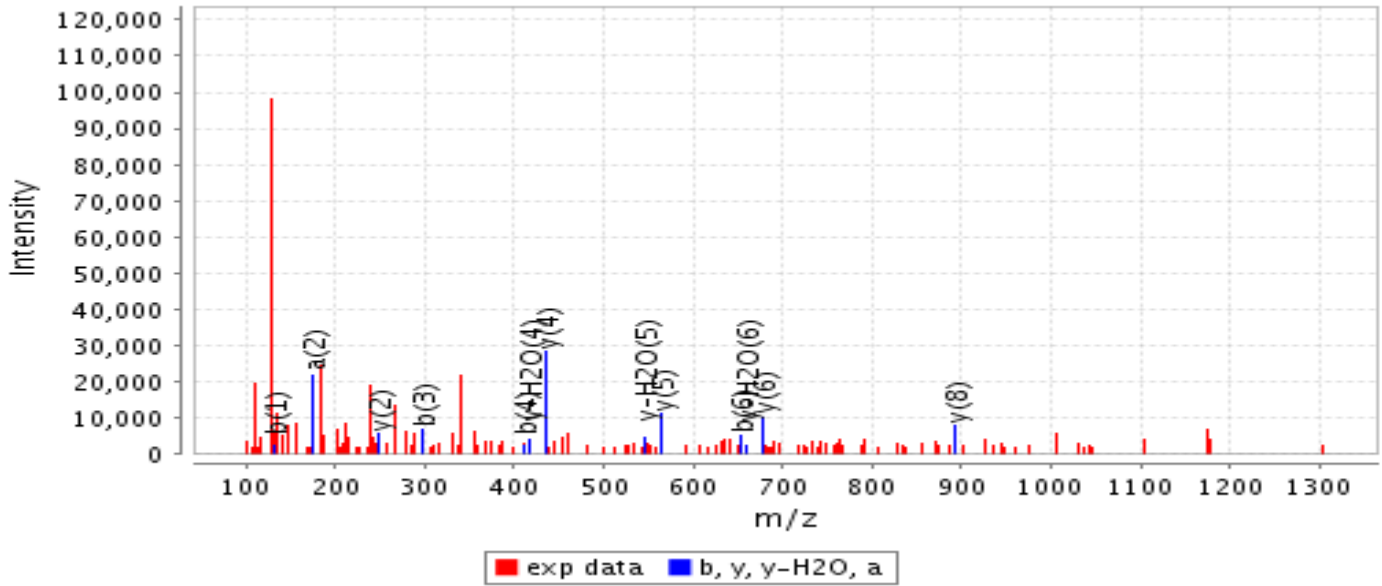

$\alpha$ -1-antitrypsin E/QNTK(<sup>13</sup>Glu<sub>6</sub>)SPLFMGKVVNPTQK/- [M+3H]<sup>3+</sup> 727.05 m/z

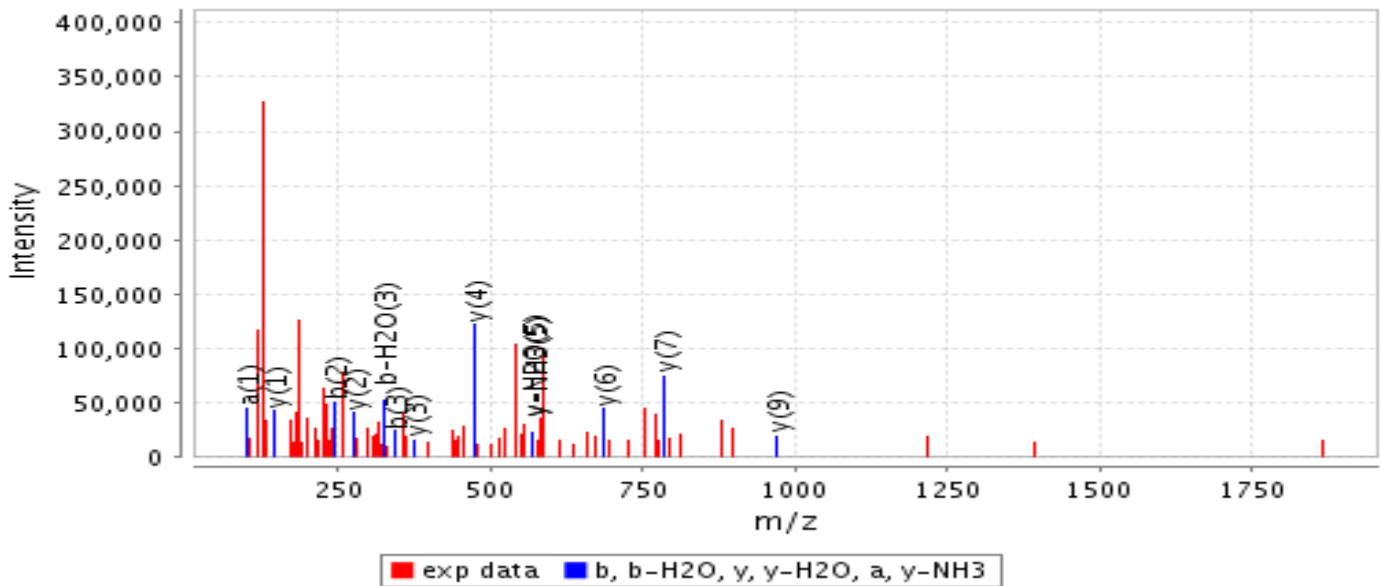

$\alpha$ -1-antitrypsin N/TKSPLFMGK(<sup>13</sup>Glu<sub>6</sub>)VVNPQTQK/- [M+3H]<sup>3+</sup> 646.35 m/z

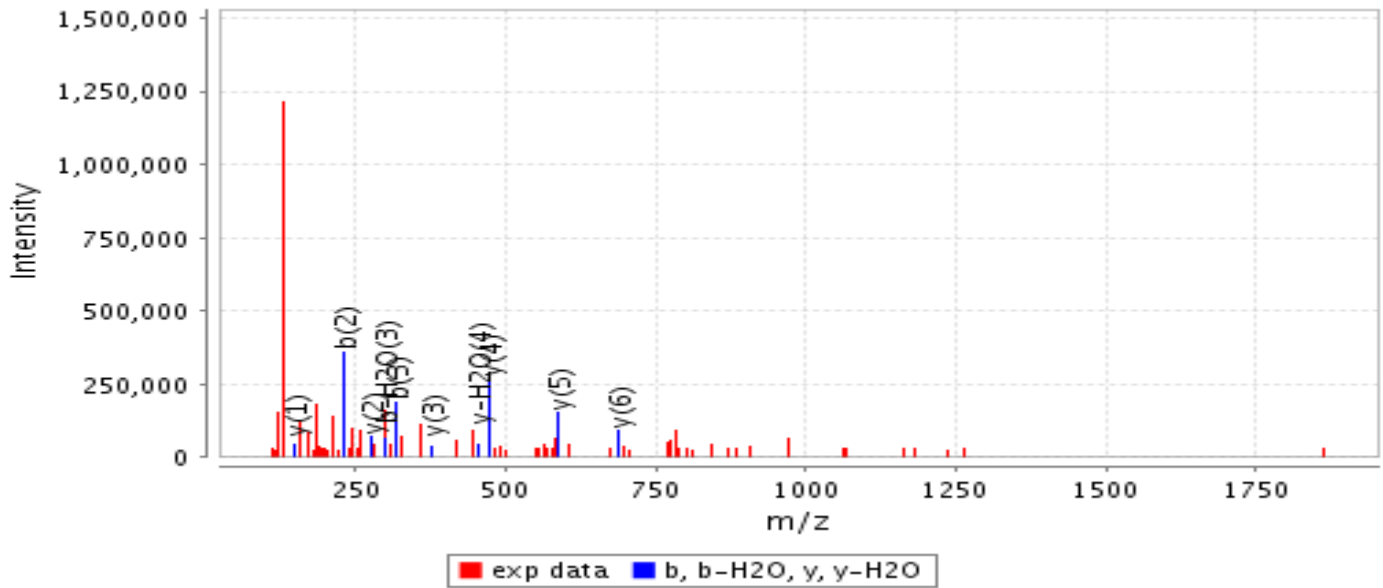

Apolipoprotein A-II E/AKSYFEK(<sup>13</sup>Glu<sub>6</sub>)SKEQLTPLIKKAGTE/L [M+3H]<sup>3+</sup> 886.81 m/z

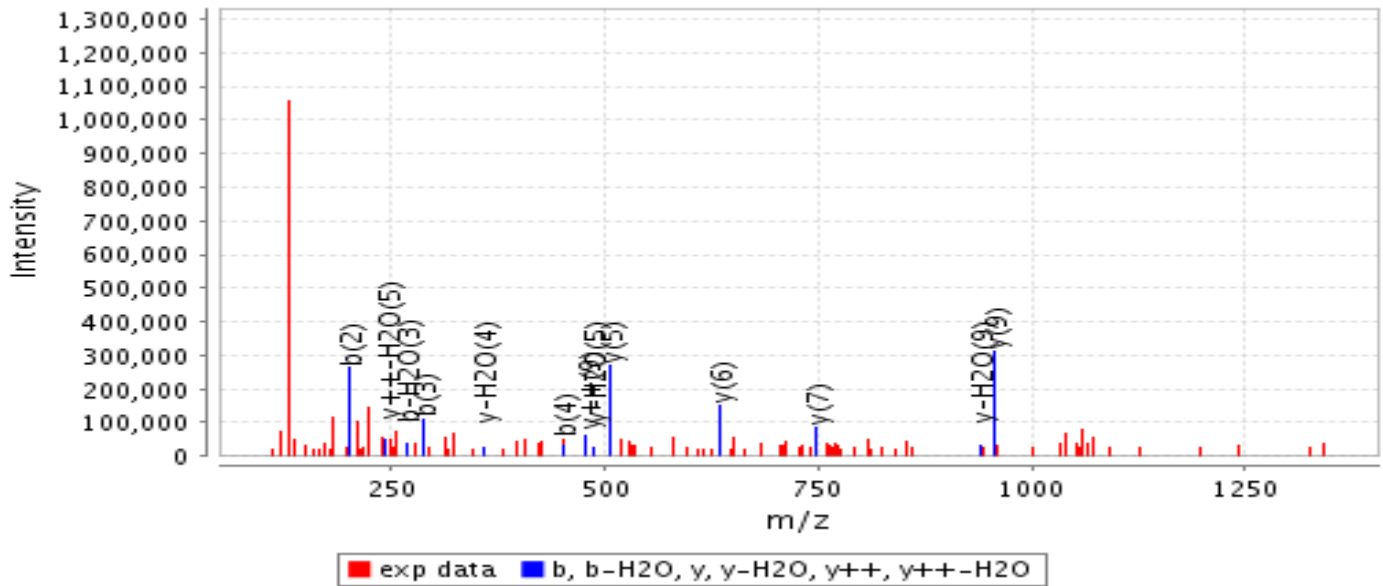

Apolipoprotein A-II E/AKSYFEKSK(<sup>13</sup>Glu<sub>6</sub>)EQLTPLIKKAGTE/L [M+3H]<sup>3+</sup> 886.81 m/z

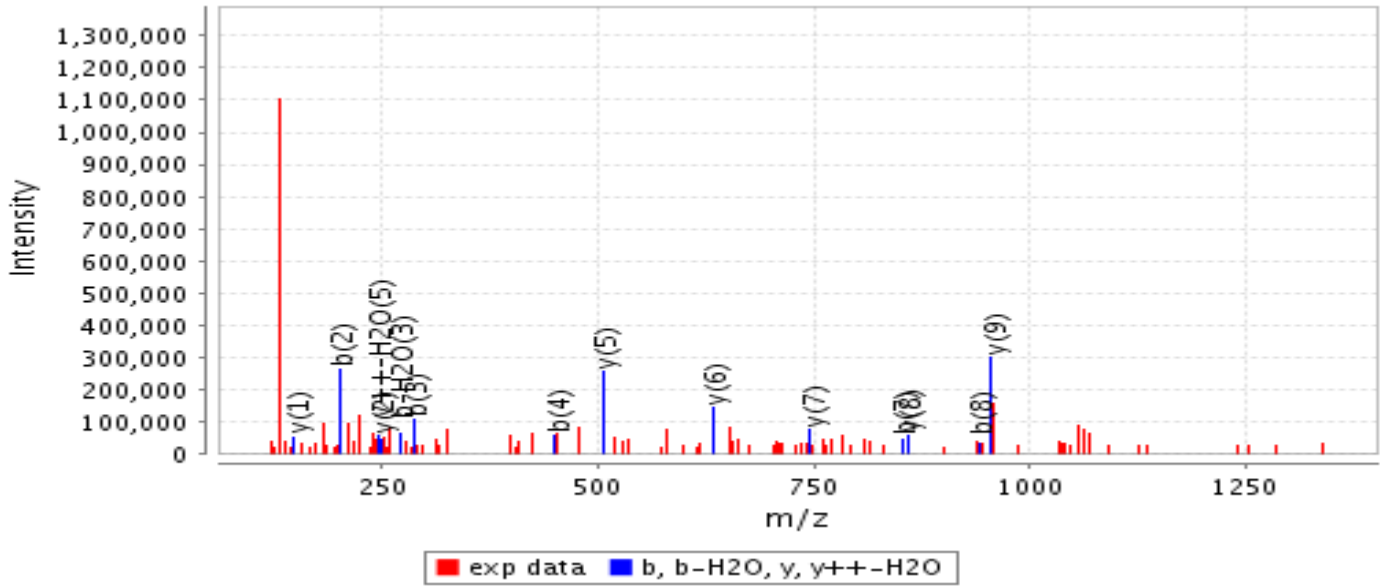

Apolipoprotein A-II E/KSKEQLTPLIK(<sup>13</sup>Glu<sub>6</sub>)KAGTE/L [M+3H]<sup>3+</sup> 645.03 m/z

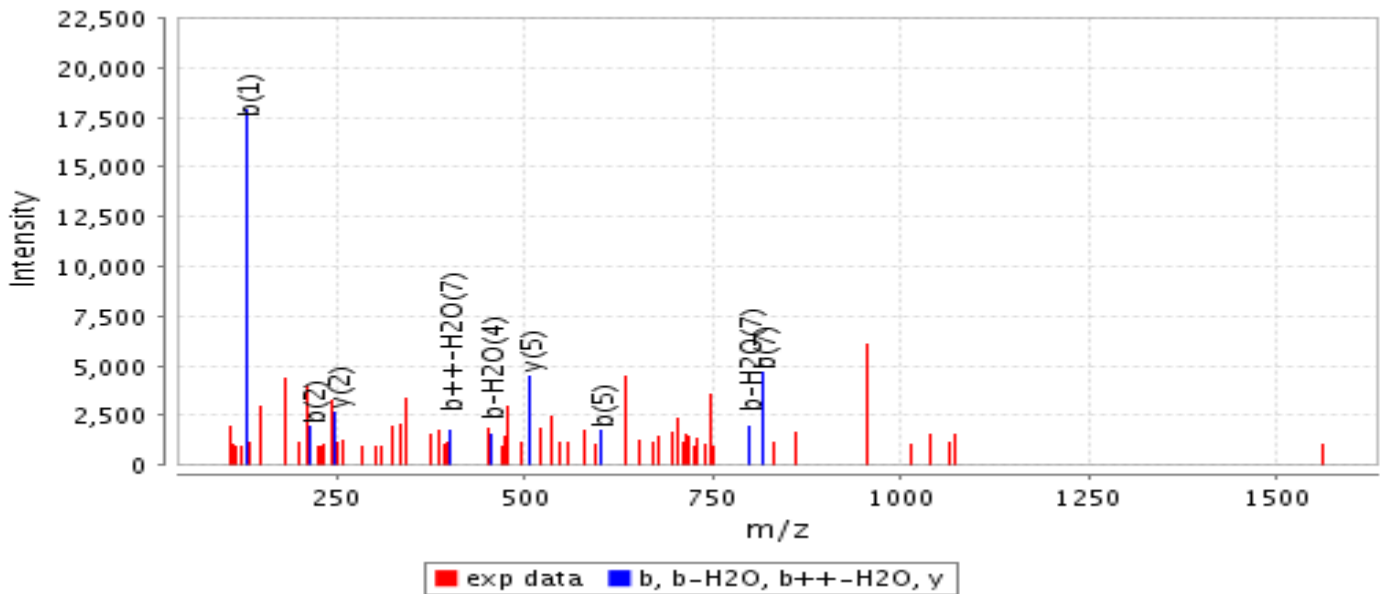

Haptoglobin-related protein KQWINK(<sup>12</sup>Glu<sub>6</sub>)AVGDKLPECE [M+3H]<sup>3+</sup> 693.01 m/z

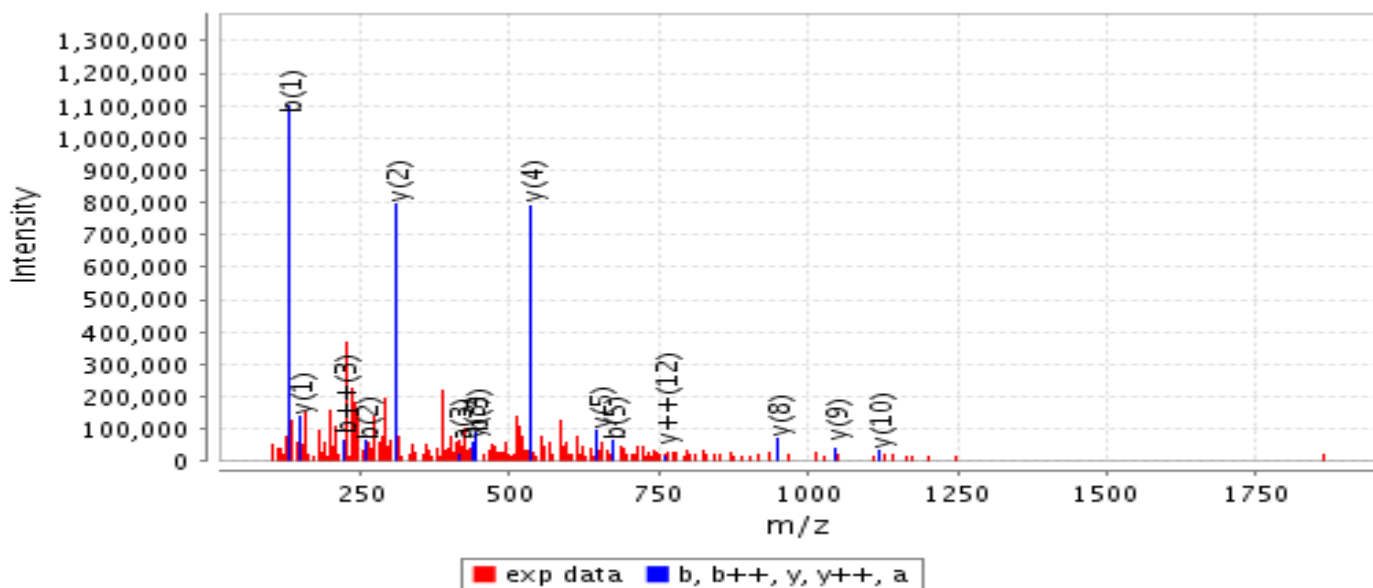

Haptoglobin-related protein KQWINKAVGDK(<sup>12</sup>Glu<sub>6</sub>)LPECE [M+3H]<sup>3+</sup> 693.01 m/z

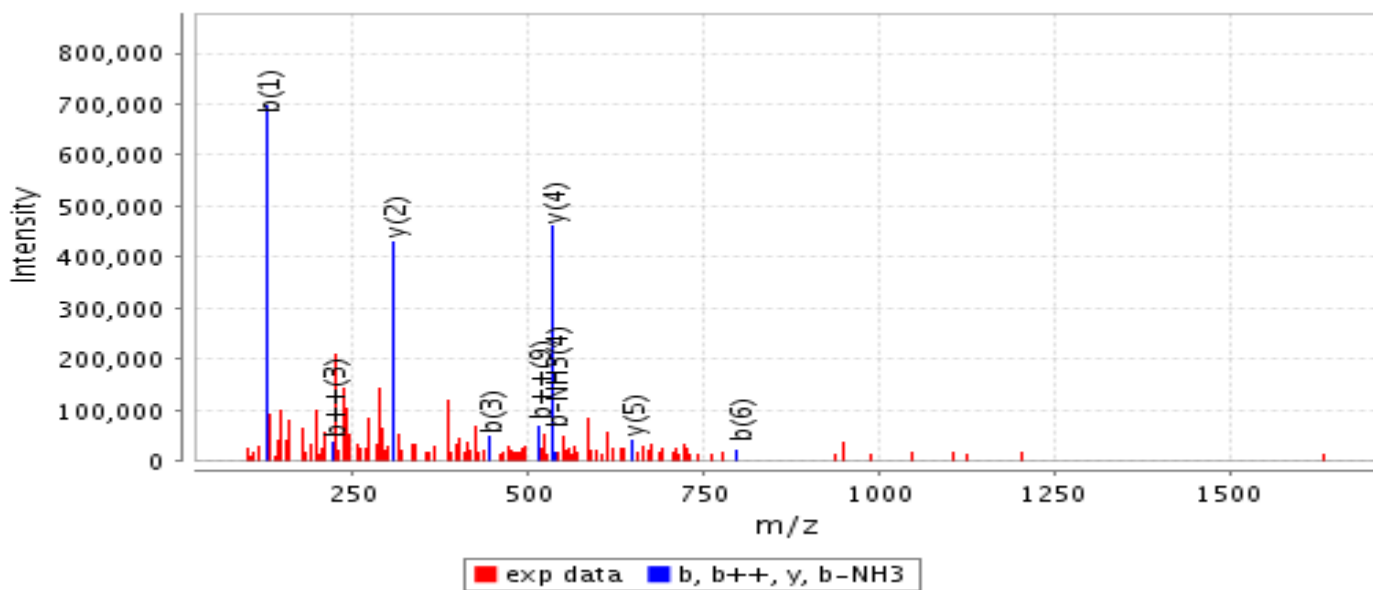



Haptoglobin-related protein AVCGK(<sup>12</sup>Glu<sub>6</sub>)PKNPANPVQR [M+4H]<sup>4+</sup> 450.24 m/z

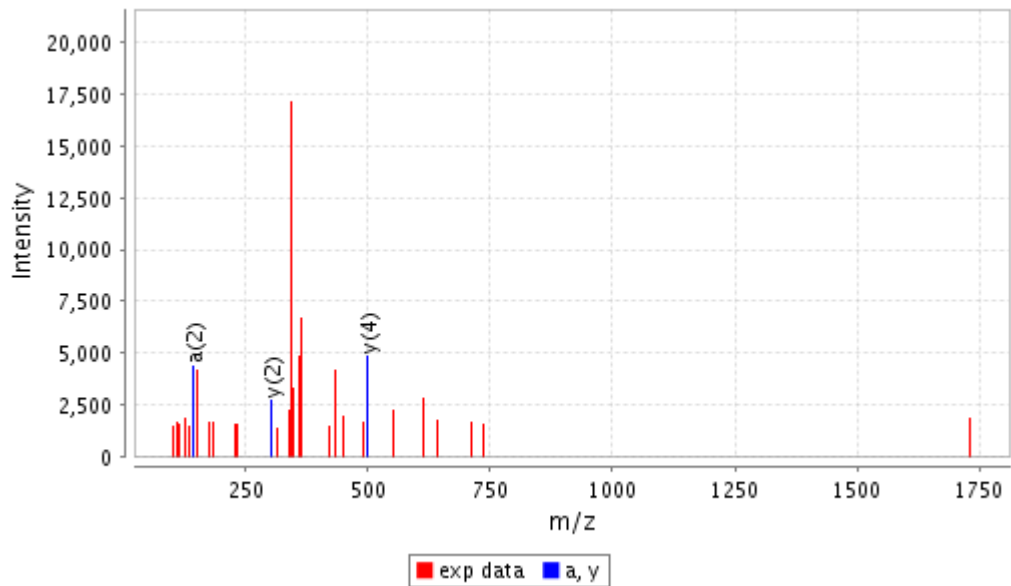

Ig  $\gamma$ -1 chain C region E/LLGPSVFLFPPK(<sup>13</sup>Glu<sub>6</sub>)PKDTLMISRTPE/V [M+3H]<sup>3+</sup> 970.20m/z

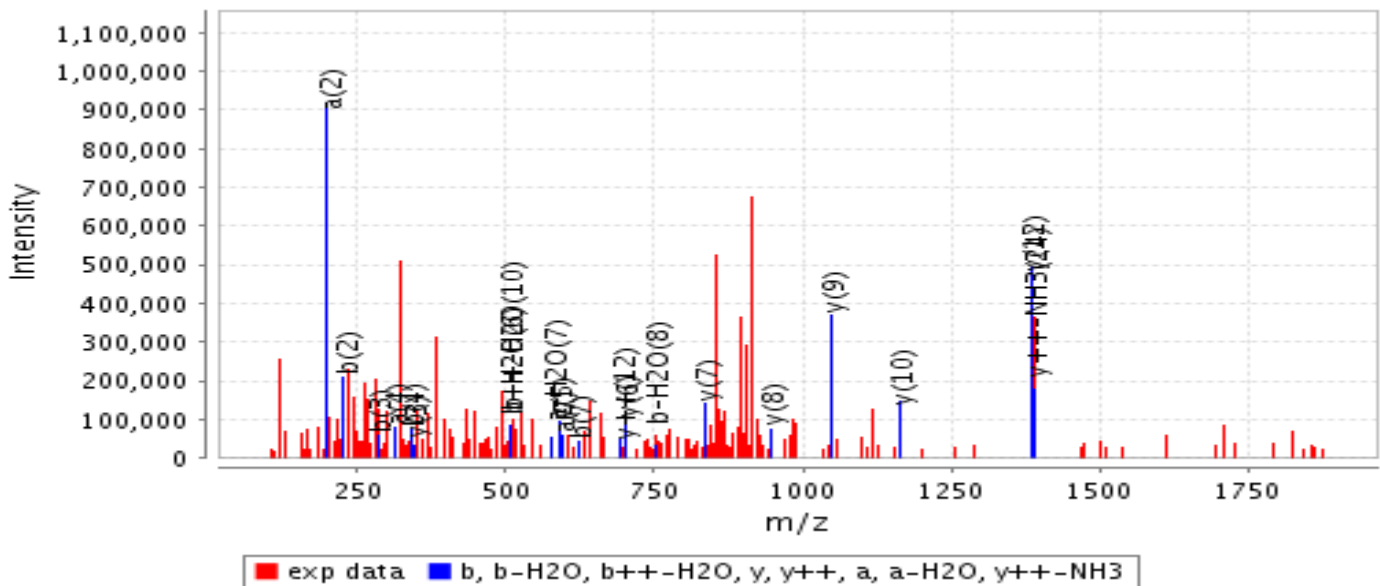

Ig  $\gamma$ -1 chain C region E/YKCKVSNKALPAPIEKTISK(<sup>13</sup>Glu<sub>6</sub>)AKGQPREPQVYTLPPSRDE/L [M+6H]<sup>6+</sup> 765.25 m/z

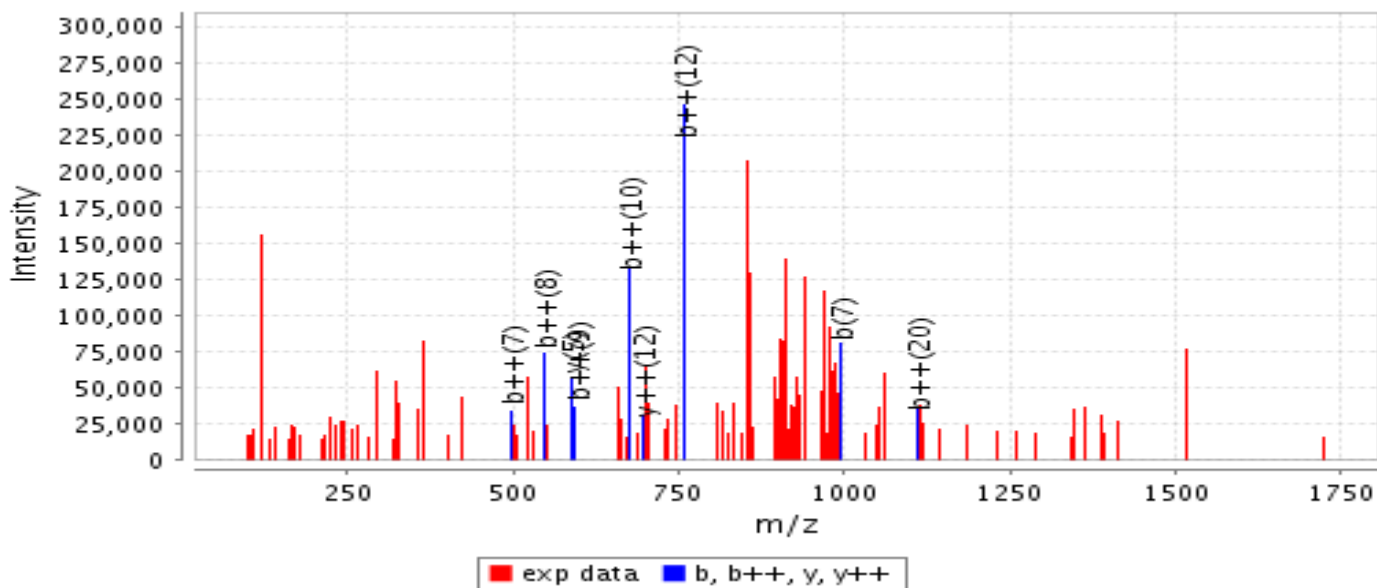

$\beta$ -2-glycoprotein 1 ./GRTCPKPDLPFSTVVPLK(<sup>13</sup>Glu<sub>6</sub>)TFYEPGEE/I [M+3H]<sup>3+</sup> 1083.20 m/z

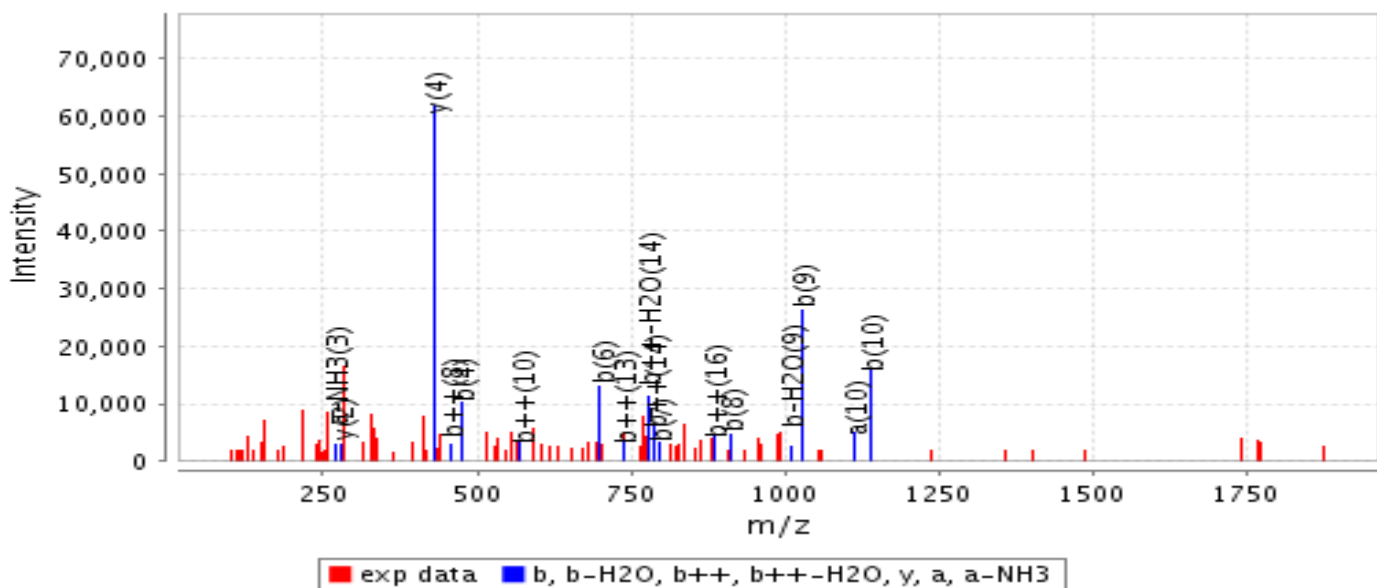

$\beta$ -2-glycoprotein 1 E/HSSLAFWK(<sup>13</sup>Glu<sub>6</sub>)TDASDVKPC/- [M+3H]<sup>3+</sup> 706.34 m/z

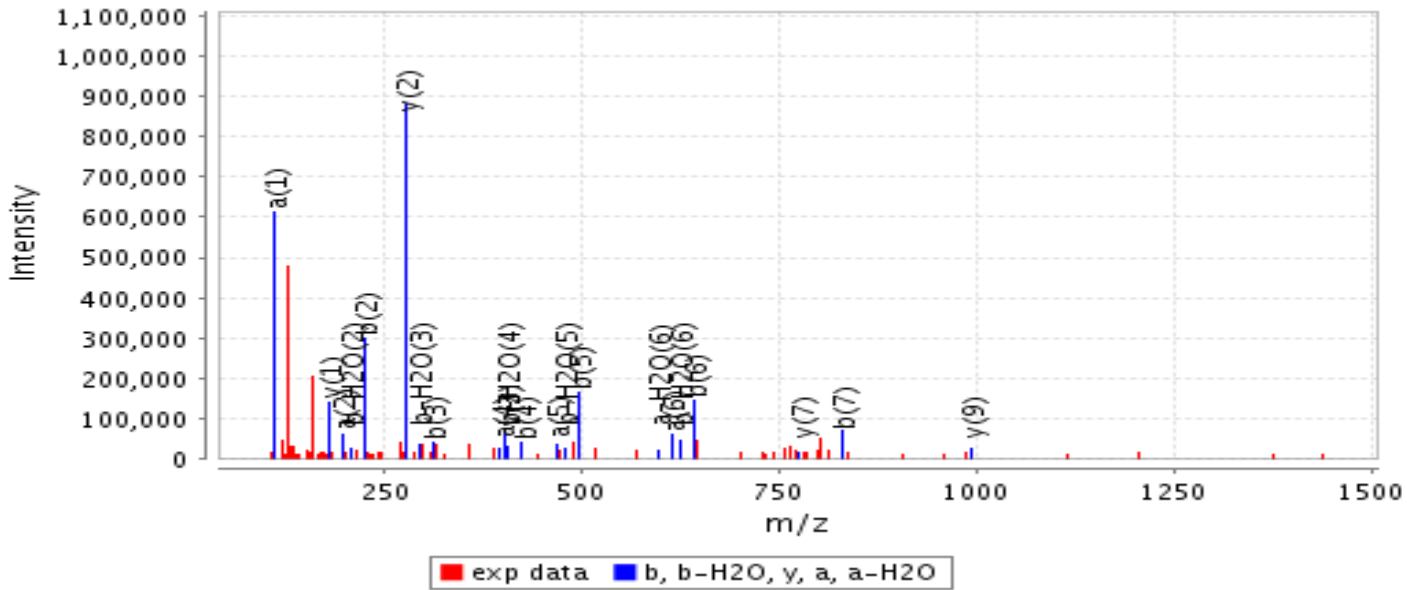

Complement factor H E/VVKCLPVTAPENGK(<sup>13</sup>Glu<sub>6</sub>)IVSSAMEPDRE/Y [M+3H]<sup>3+</sup> 724.36 m/z

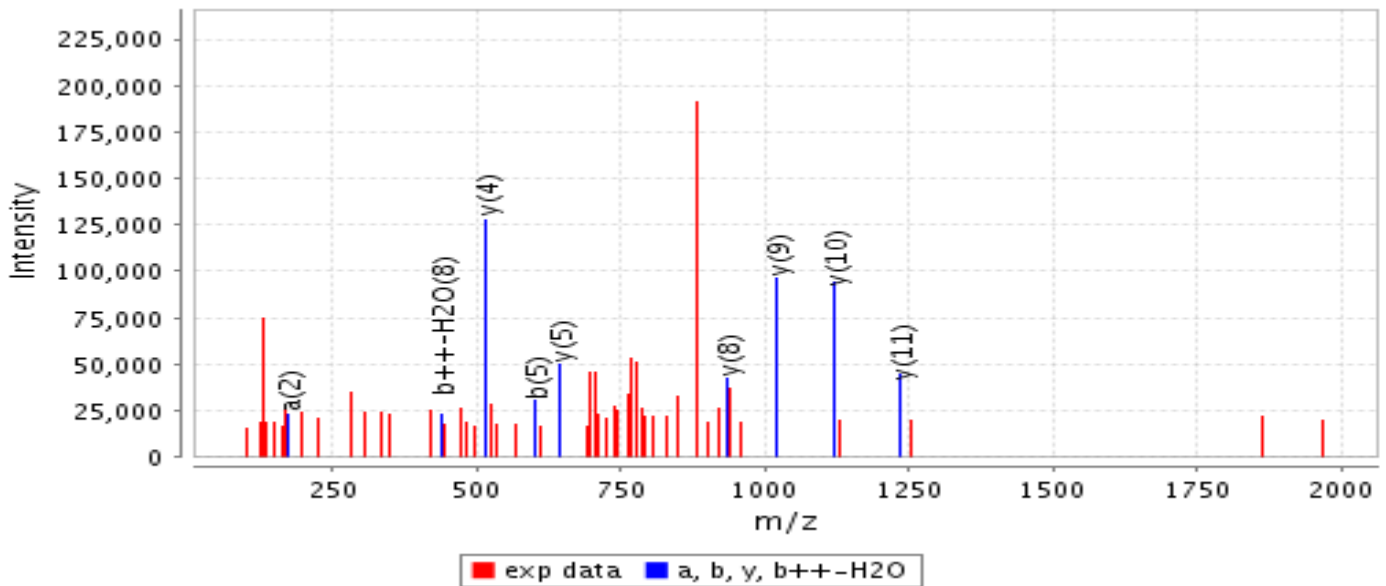

Complement factor H E/MHCSDDGFWSK(<sup>12</sup>Glu<sub>6</sub>)EKPKCVE/I [M+4H]<sup>4+</sup> 601.26 m/z

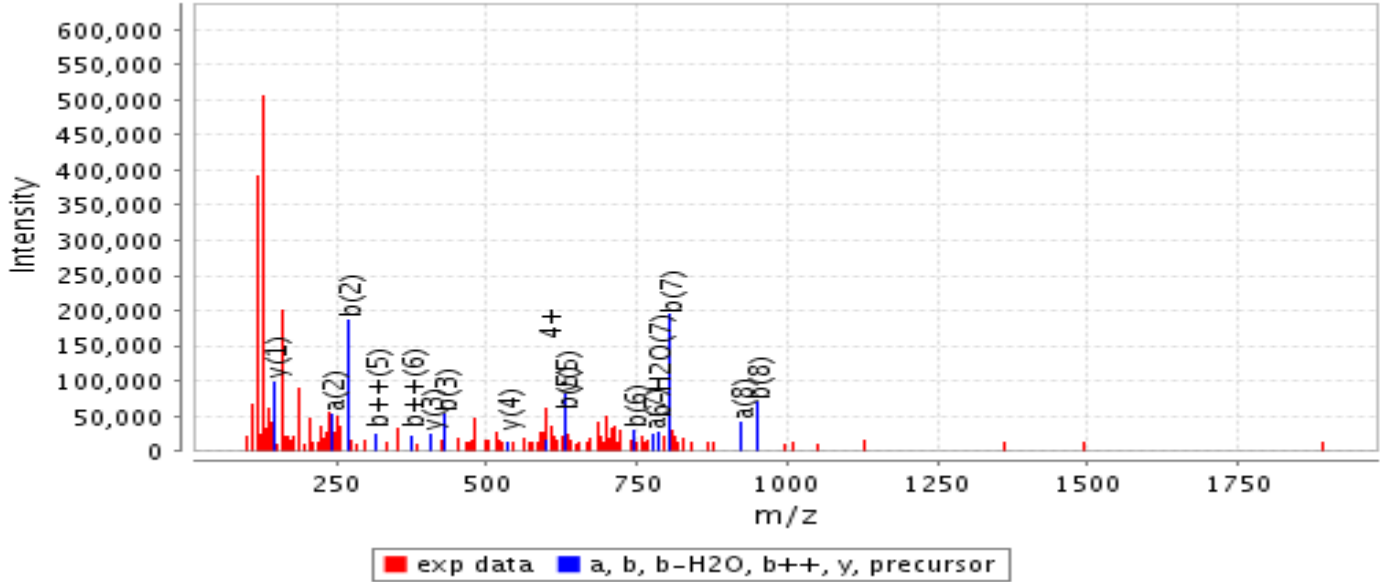

Complement factor H E/GNK(<sup>13</sup>Glu<sub>6</sub>)RITCRNGQWSEPPKCLHPCVISRE/I [M+5H]<sup>5+</sup> 690.34 m/z

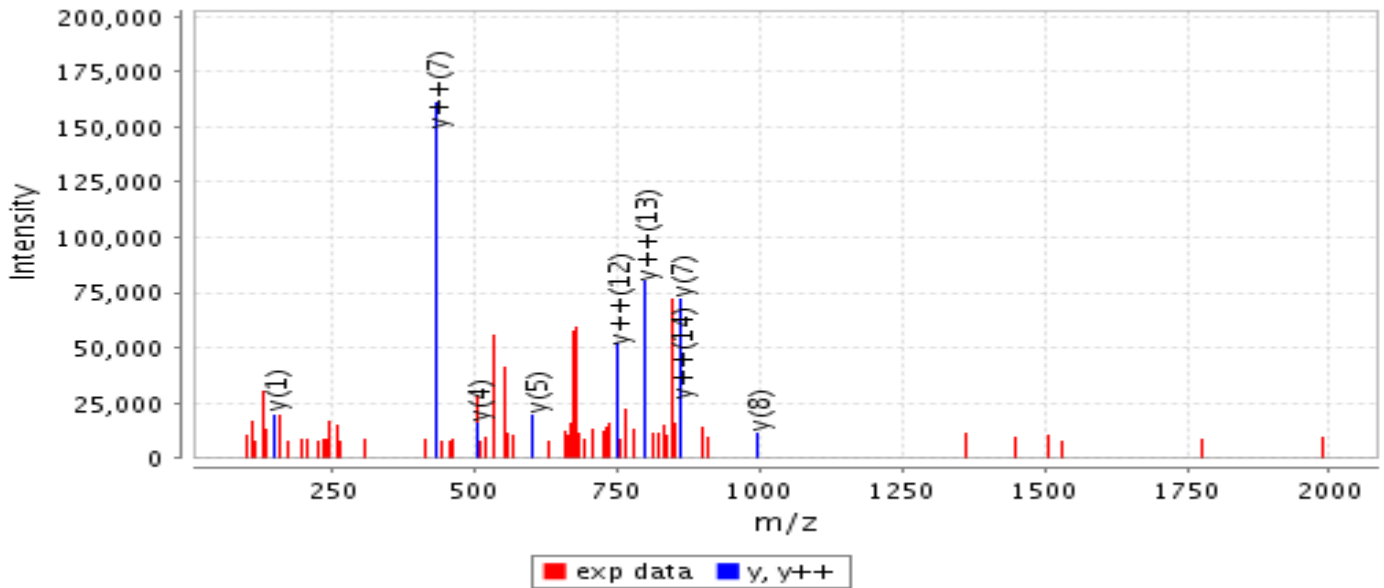

Complement C3c  $\alpha'$  chain fragment E/AHDAQDVPVTVVHDFPGK(<sup>13</sup>Glu<sub>6</sub>)KLVLSSE/K [M+5H]<sup>5+</sup> 603.71 m/z

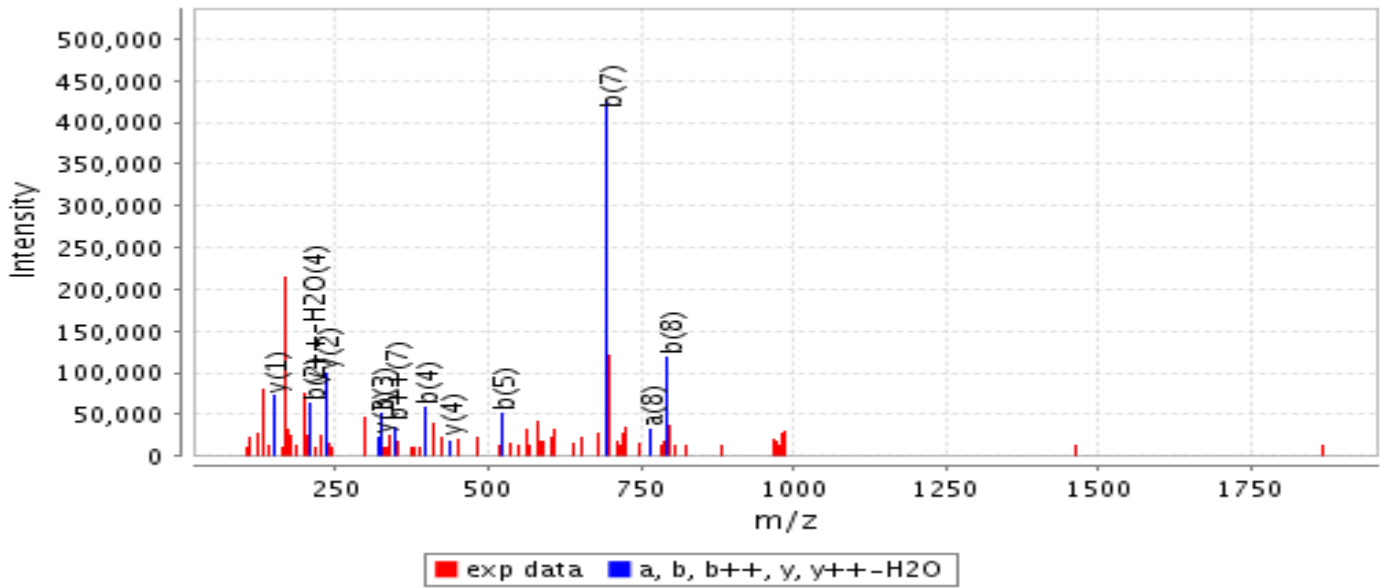

Complement C3c  $\alpha'$  chain fragment R/SVQLTEKRMDK(<sup>13</sup>Glu<sub>6</sub>)VGKYPKELRKCCCE/D [M+3H]<sup>3+</sup> 1050.87 m/z

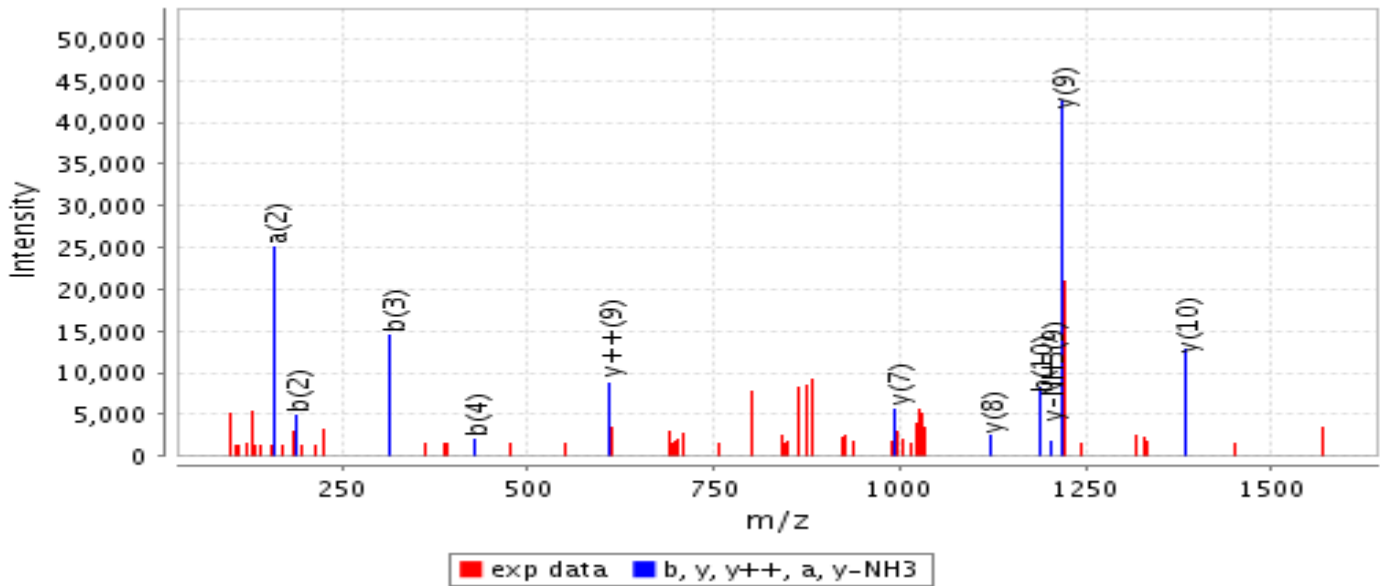

Complement C3c  $\alpha'$  chain fragment R/SVQLTEKRM<sup>13</sup>Glu<sub>6</sub>YPKELRKCE/D [M+3H]<sup>3+</sup> 1050.86 m/z

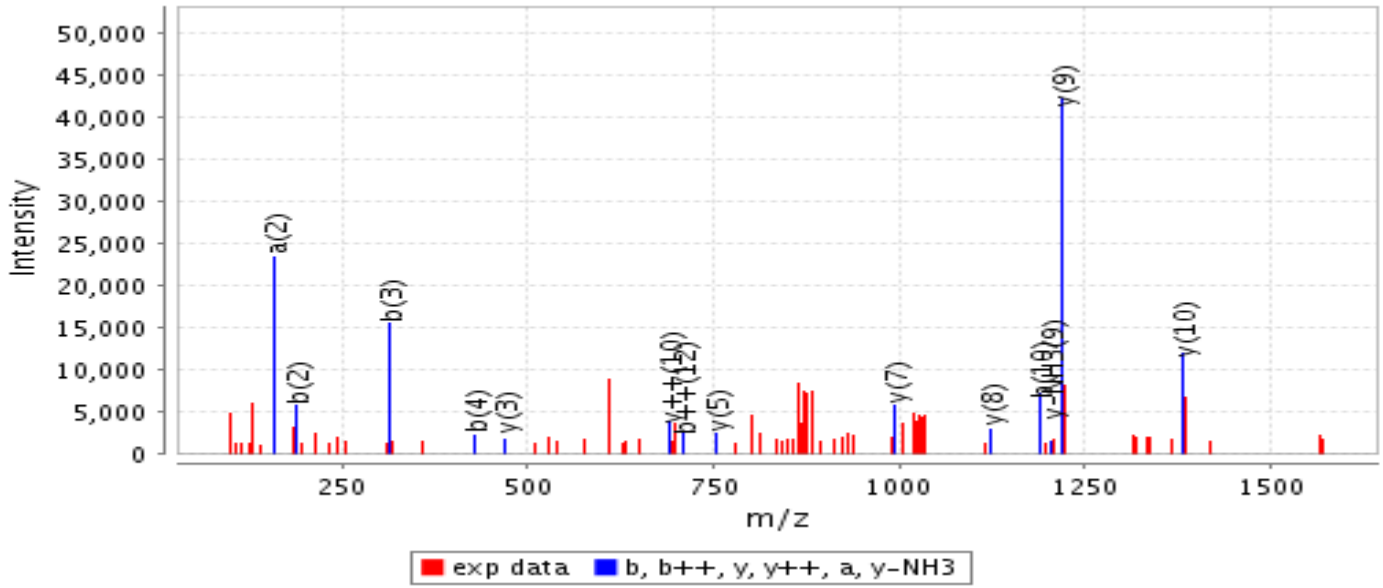

Ig  $\gamma$ -4 chain C region L/FPPK<sup>13</sup>Glu<sub>6</sub>PKDTLMISRTPE/V [M+3H]<sup>3+</sup> 675.93 m/z

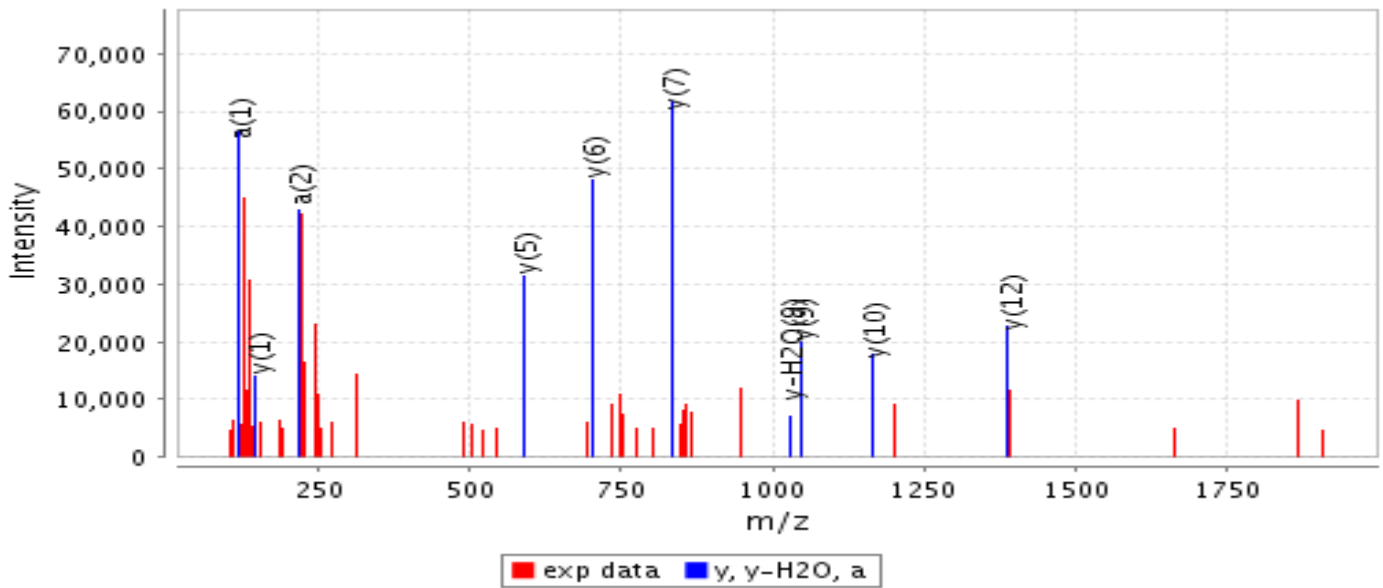

Histidine-rich glycoprotein E/SCPGK(<sup>12</sup>Glu<sub>6</sub>)FKSGFPQVSMFFHTFPK/- [M+4H]<sup>4+</sup> 706.84 m/z

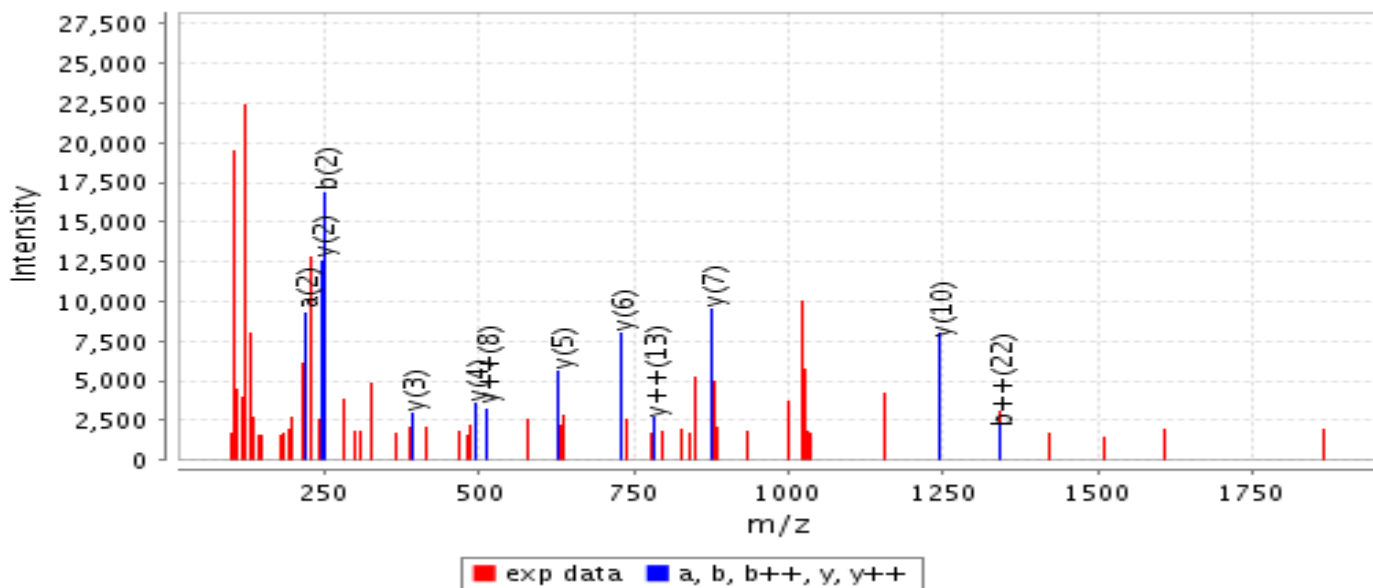

Ugl-Y3 E/FKCDPHEATCYDDGK(<sup>13</sup>Glu<sub>6</sub>)TYHVGE/Q [M+4H]<sup>4+</sup> 675.03 m/z

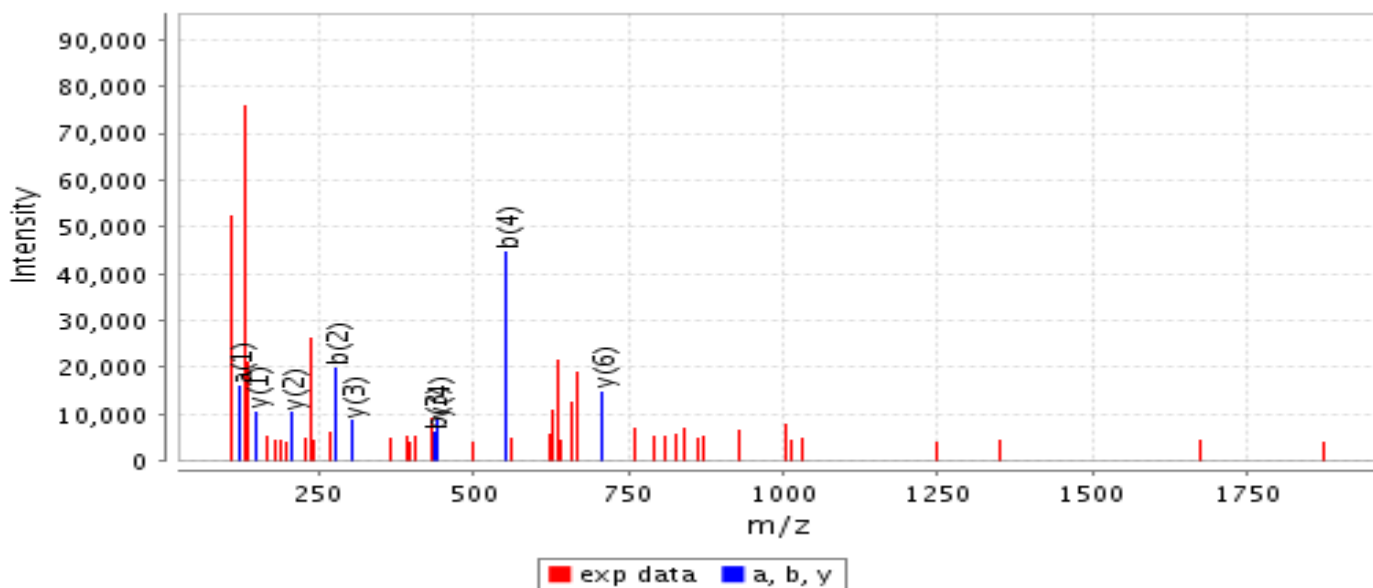

$\alpha$ -2-HS-glycoprotein chain B E/TTCHVLDPTPVAR(<sup>12</sup>Glu<sub>6</sub>)CSVRQLKE/H [M+3H]<sup>3+</sup> 877.11 m/z

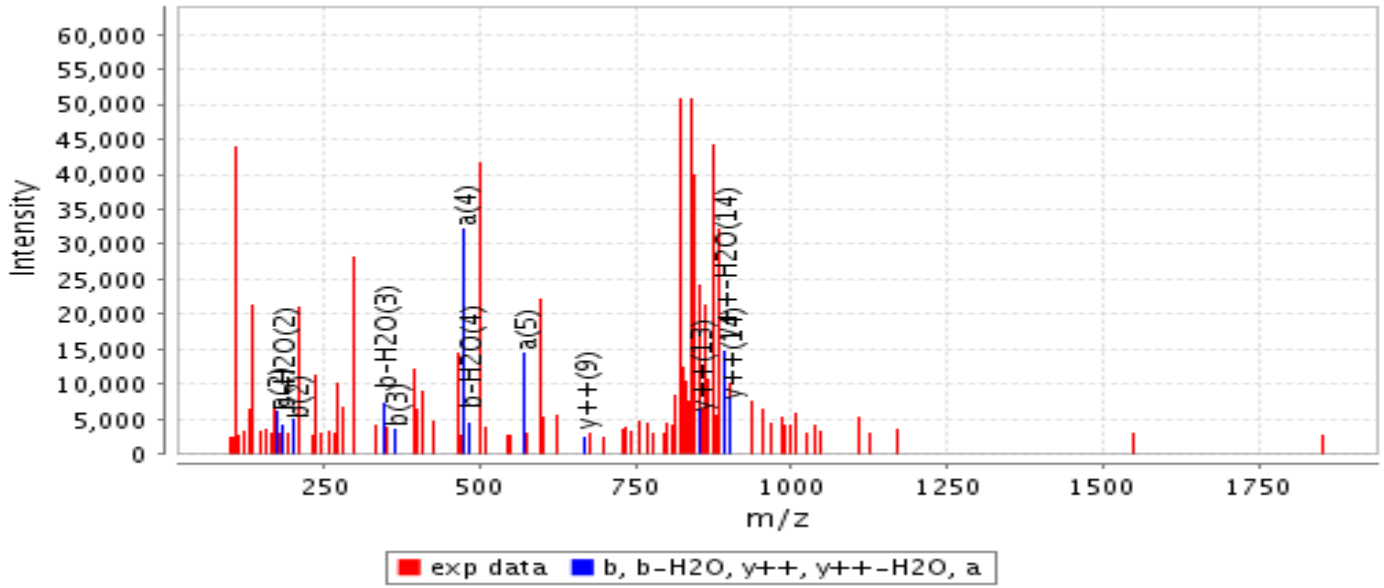

$\alpha$ -2-HS-glycoprotein chain B E/KQYGFCK(<sup>12</sup>Glu<sub>6</sub>)ATLSEKLGGAE/V [M+3H]<sup>3+</sup> 717.02 m/z

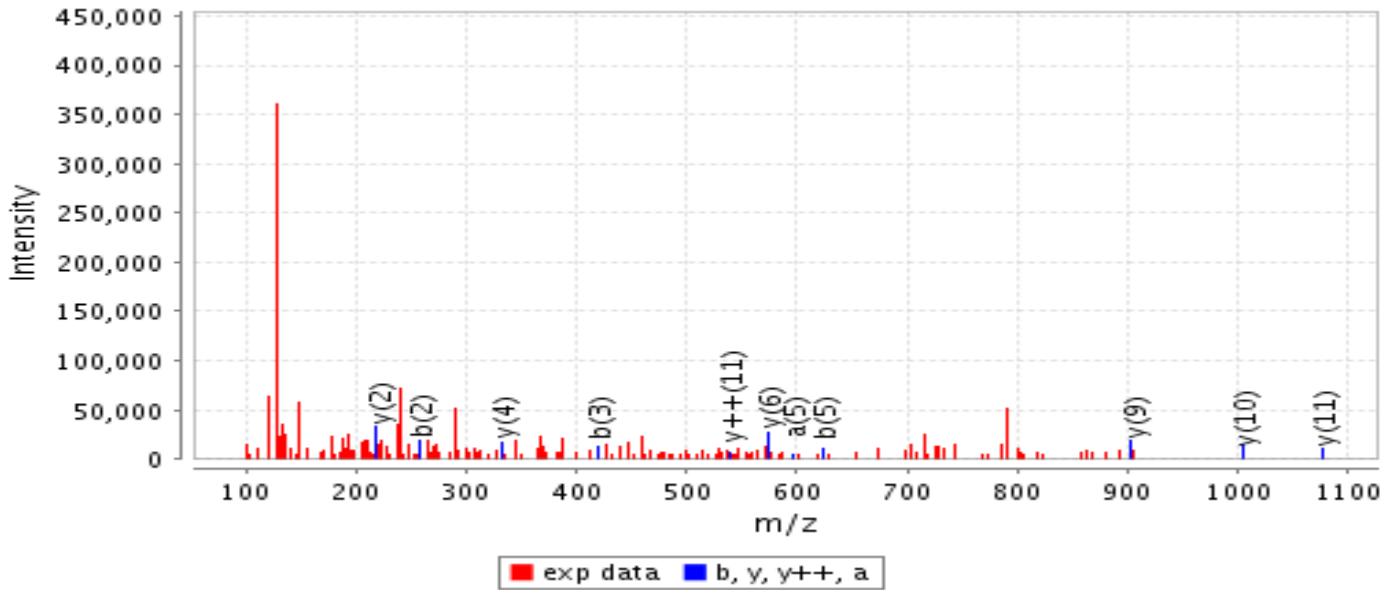



Ig  $\gamma$ -2 chain C region N/FGTQTYTCNV<sup>13</sup>DHK(<sup>13</sup>Glu<sub>6</sub>)PSNTKVDKTVE/R [M+4H]<sup>4+</sup> 735.10 m/z

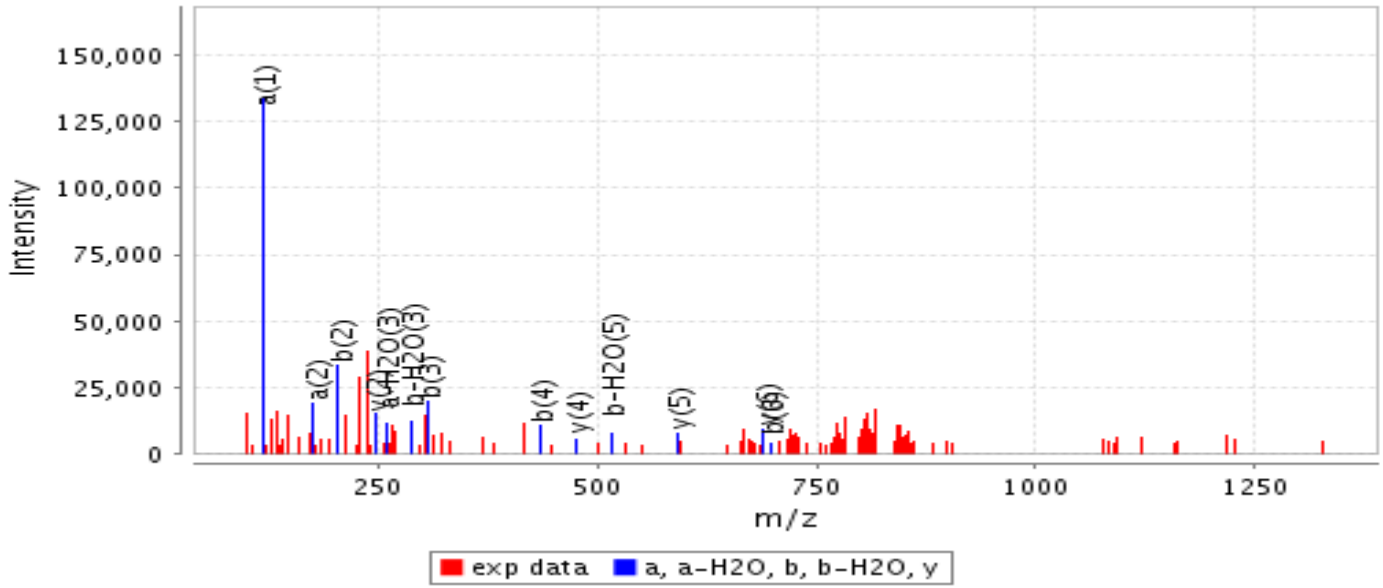

Ig  $\gamma$ -2 chain C region E/RKCCVECPCAPPVAGPSVFLFPPK(<sup>12</sup>Glu<sub>6</sub>)PKDTLMISRTPE/V [M+5H]<sup>5+</sup> 900.45 m/z

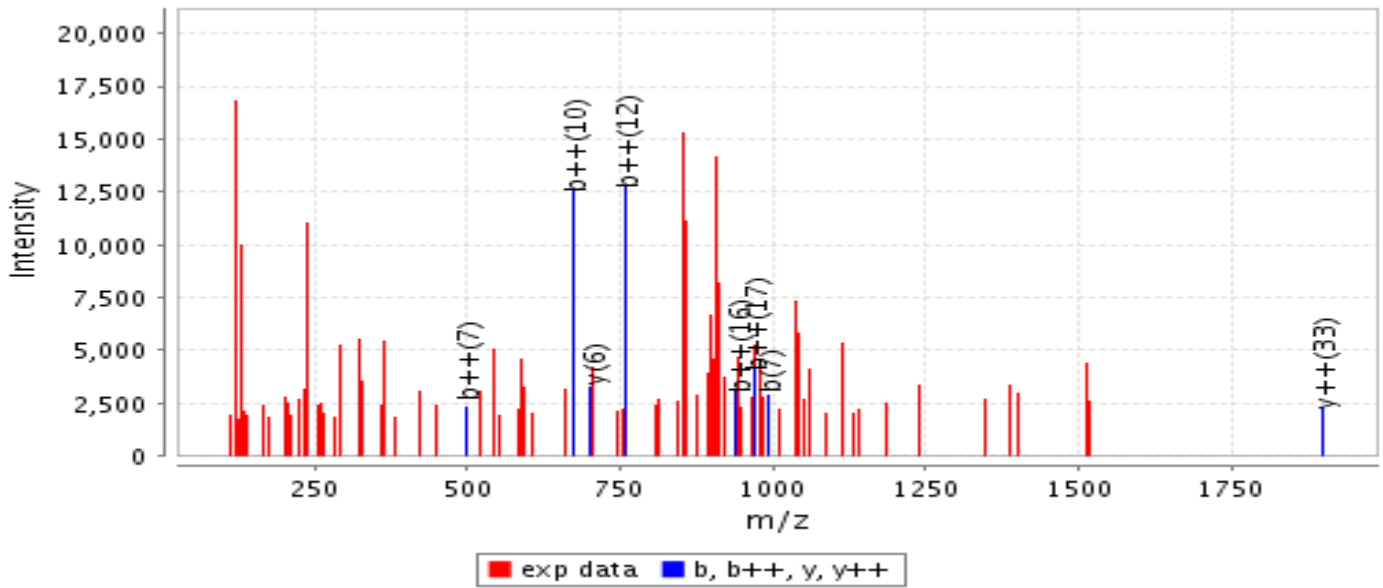

Fibrinopeptide B E/YCRTPCTVSCNIPVVSGK(<sup>12</sup>Glu<sub>6</sub>)ECEE/I [M+3H]<sup>3+</sup> 936.40 m/z

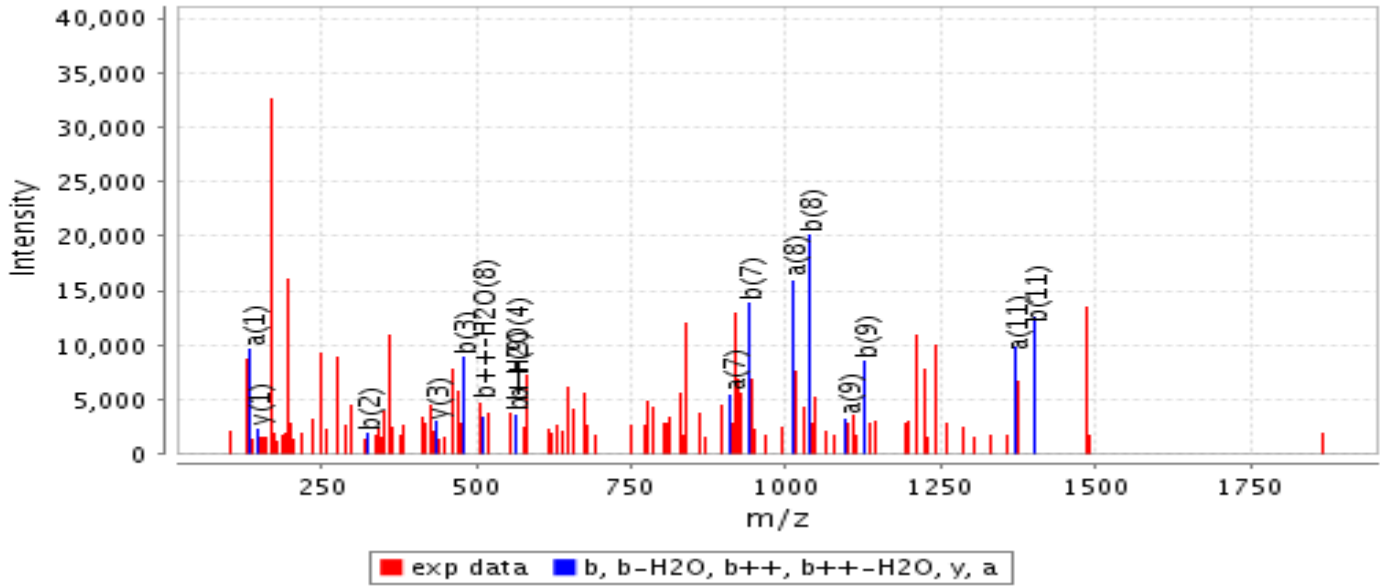

Spectrin  $\beta$  chain, brain 1 W/KSLLDACESRRVR(<sup>13</sup>Glu<sub>6</sub>)LVD/T [M+3H]<sup>3+</sup> 693.70 m/z

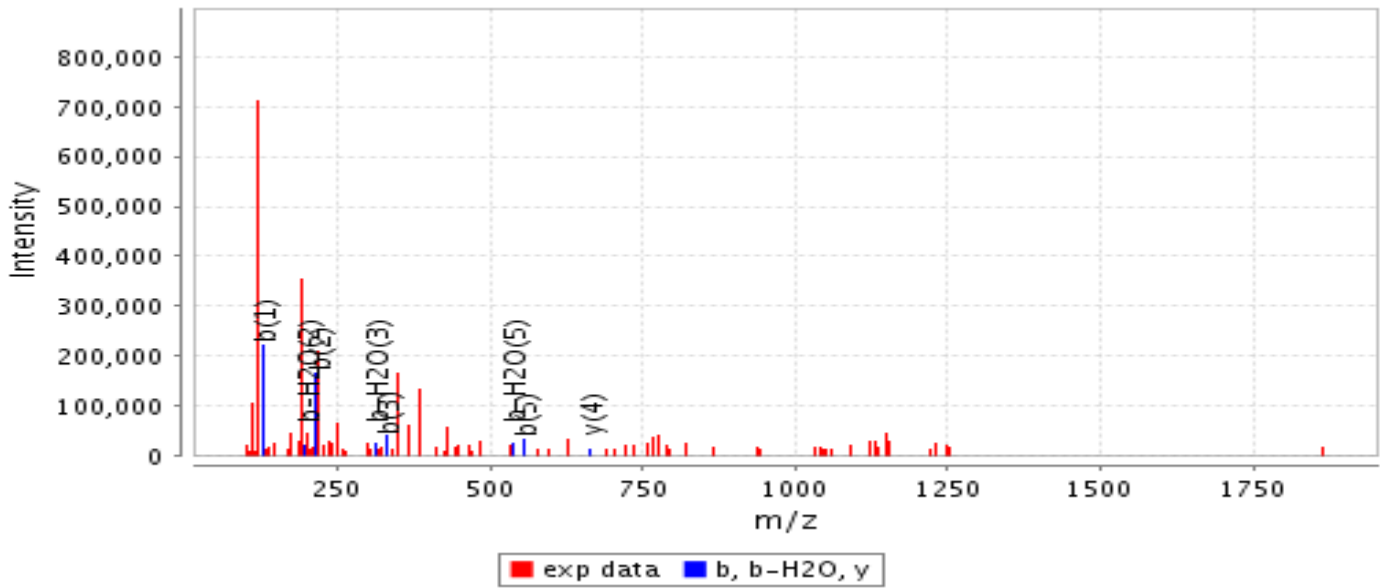

Ig  $\alpha$ -1 chain C region E/SK(<sup>12</sup>Glu<sub>6</sub>)TPLTATLSKSGNTFRPE/V [M+3H]<sup>3+</sup> 733.05 m/z

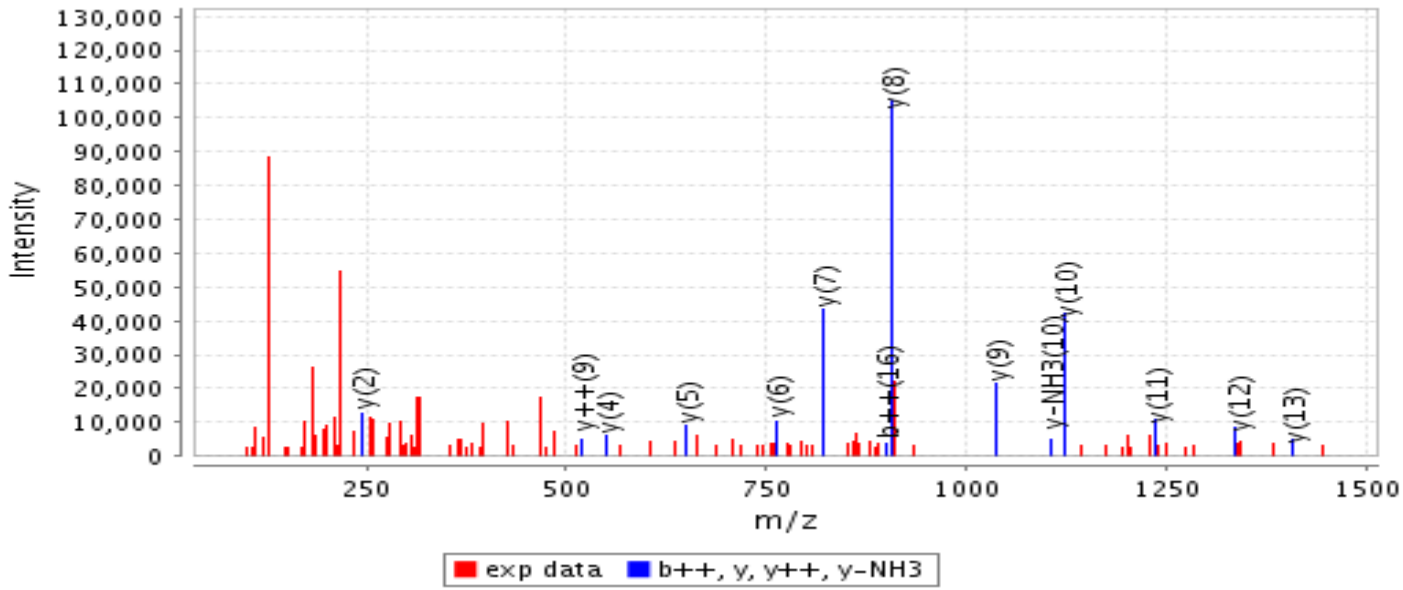

Ig  $\alpha$ -1 chain C region E/SKTPLTATLSK(<sup>12</sup>Glu<sub>6</sub>)SGNTFRPE/V [M+3H]<sup>3+</sup> 733.05 m/z

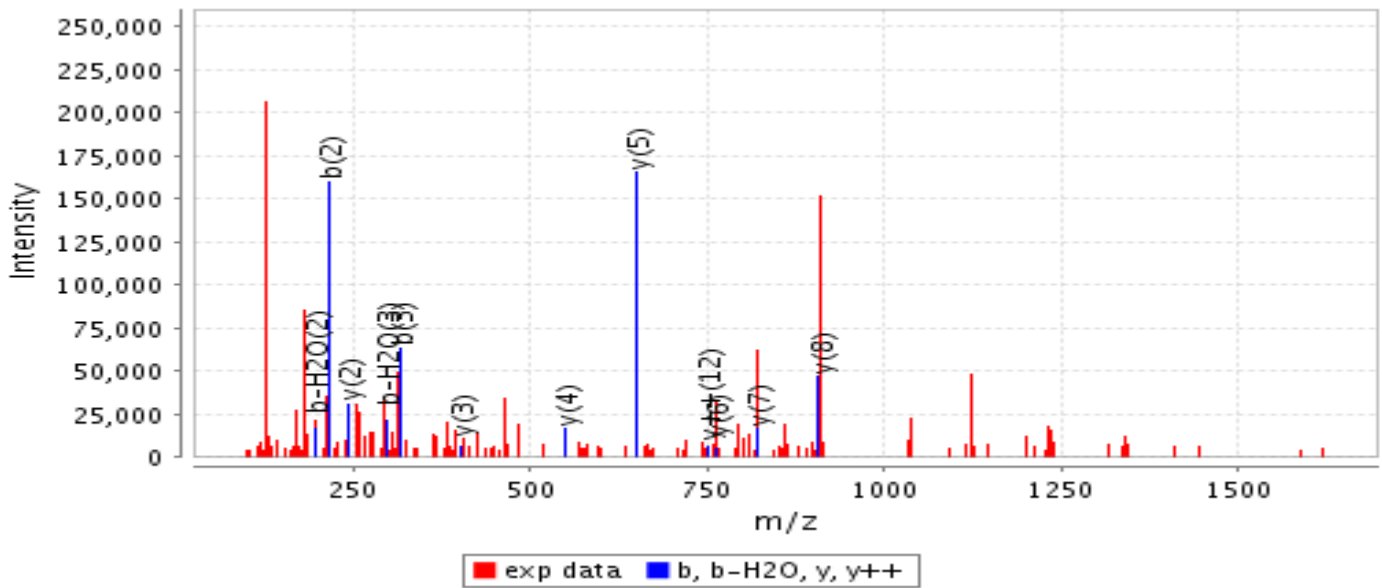

Fibrinopeptide A D/LVPGNFK(<sup>13</sup>Glu<sub>6</sub>)SQLQKVPPEWKALTDMPQMRME/L [M+4H]<sup>4+</sup> 892.46 m/z

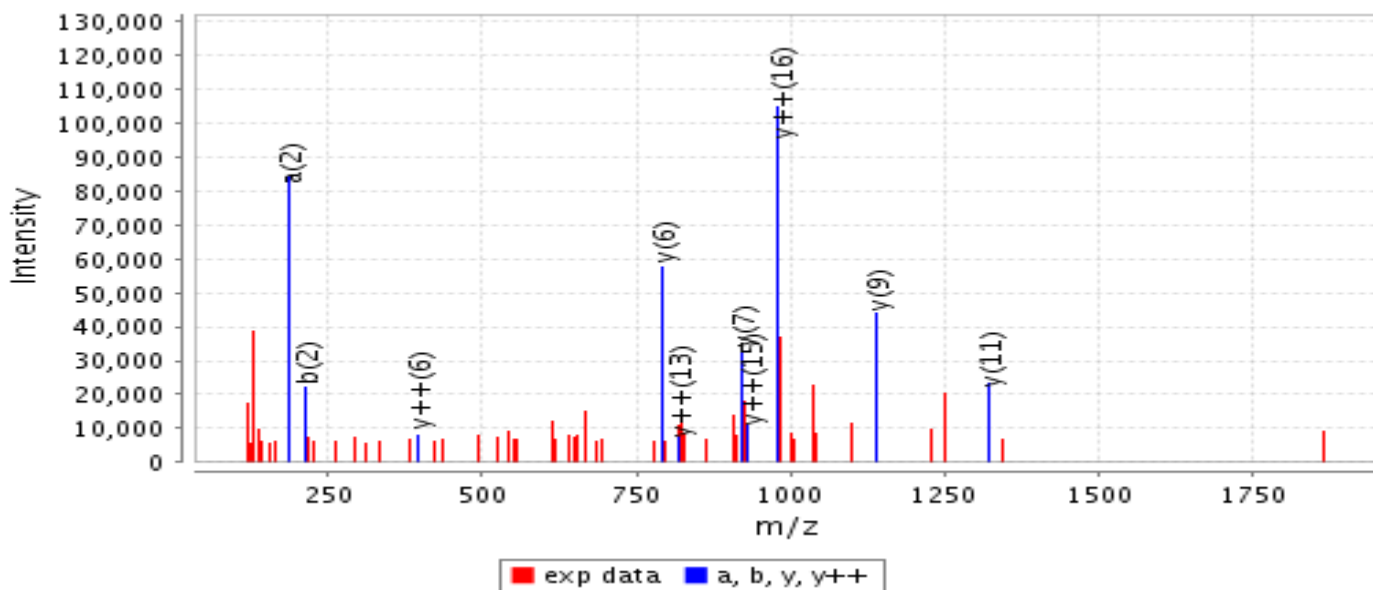

$\alpha$ -2-macroglobulin ./SVSGK(<sup>13</sup>Glu<sub>6</sub>)PQYMLVPSLLHTE/T [M+3H]<sup>3+</sup> 751.72 m/z

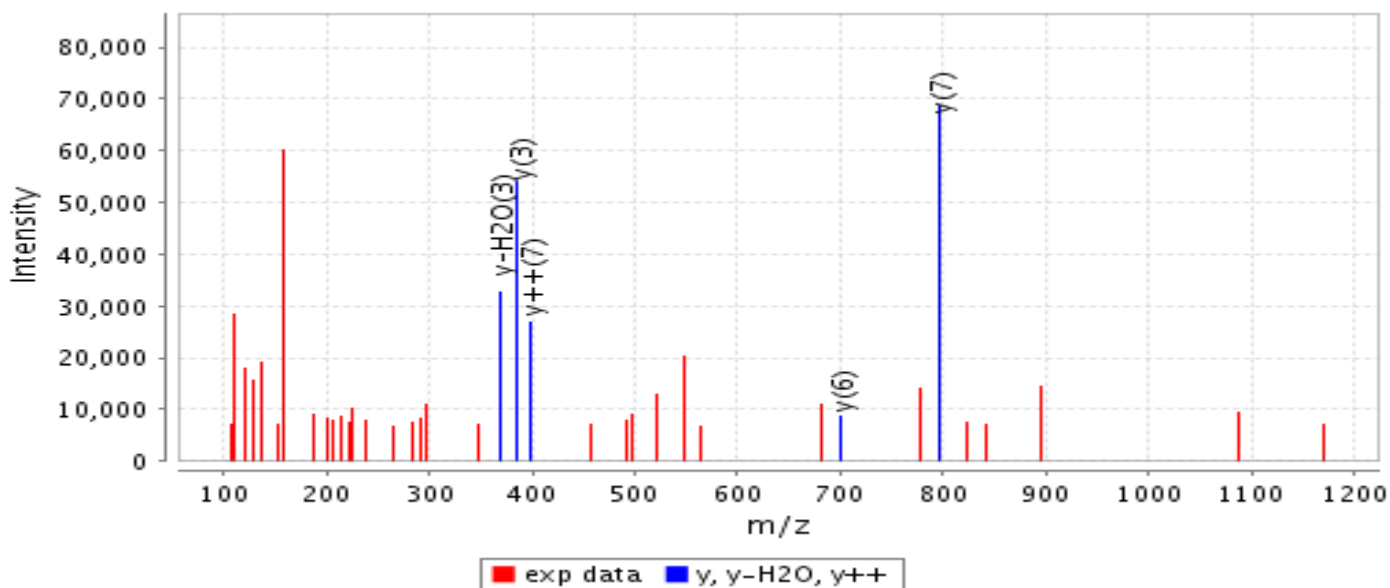

Afadin E/KR(<sup>12</sup>Glu<sub>6</sub>)MQEF/R [M+3H]<sup>3+</sup> 499.29 m/z

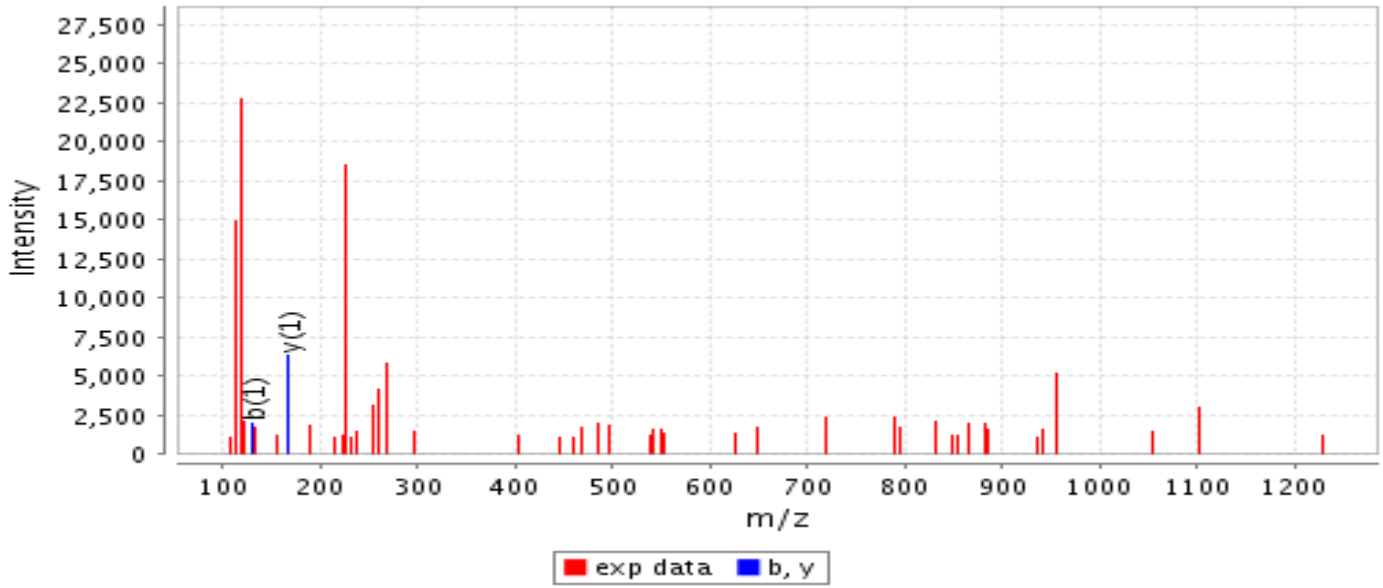

Serum albumin ./SVSGK(<sup>13</sup>Glu<sub>6</sub>)PQYMMVLVPSLLHTE/T [M+3H]<sup>3+</sup> 406.20 m/z

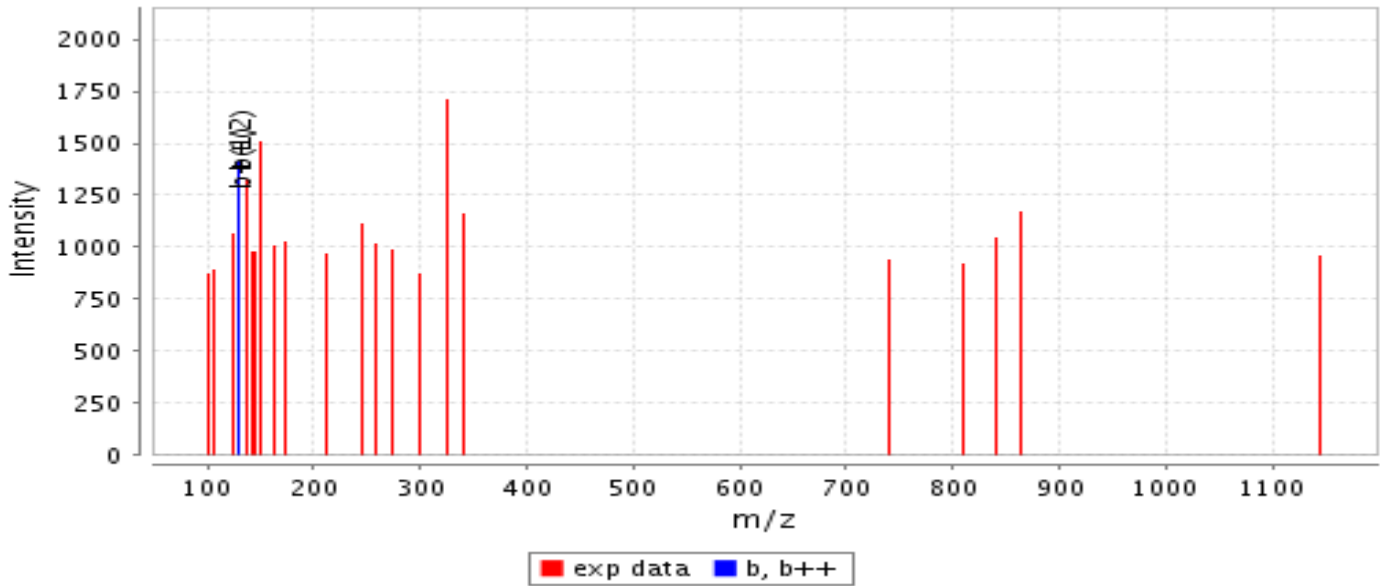

Afadin E/KR(<sup>12</sup>Glu<sub>6</sub>)MQEF/R [M+3H]<sup>3+</sup> 499.29 m/z

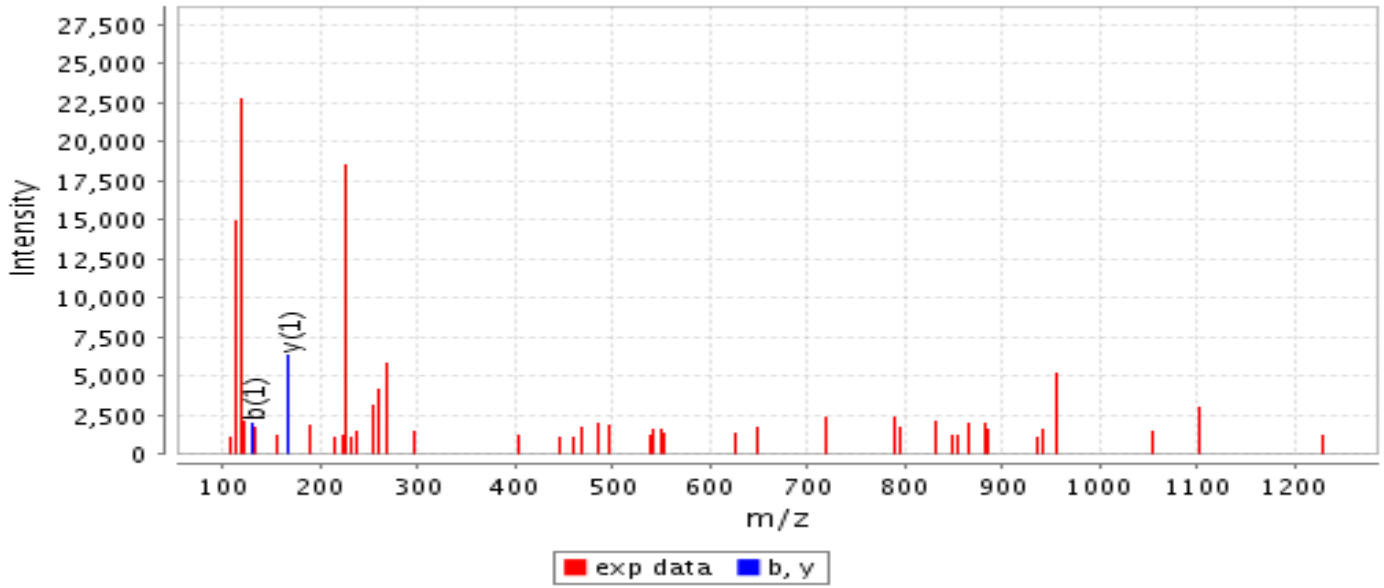

Serum albumin ./SVSGK(<sup>13</sup>Glu<sub>6</sub>)PQYMMVLVPSLLHTE/T [M+3H]<sup>3+</sup> 406.20 m/z

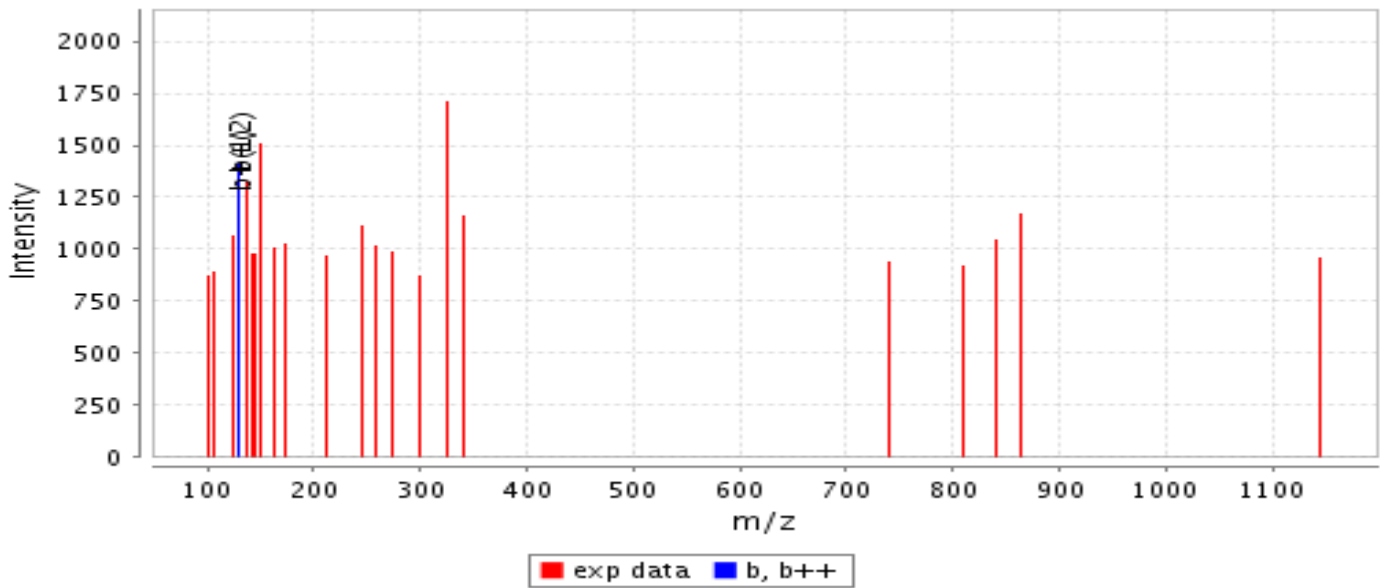

# HCD-MS2 spectra of additional glycosylated peptides identified in the analysis of human plasma with the prediction approach

Serum albumin E/CFLQHKDDNP<sup>(12Glu<sub>6</sub>)</sup>LVRPE/V [M+3H]<sup>3+</sup> 837.42 m/z

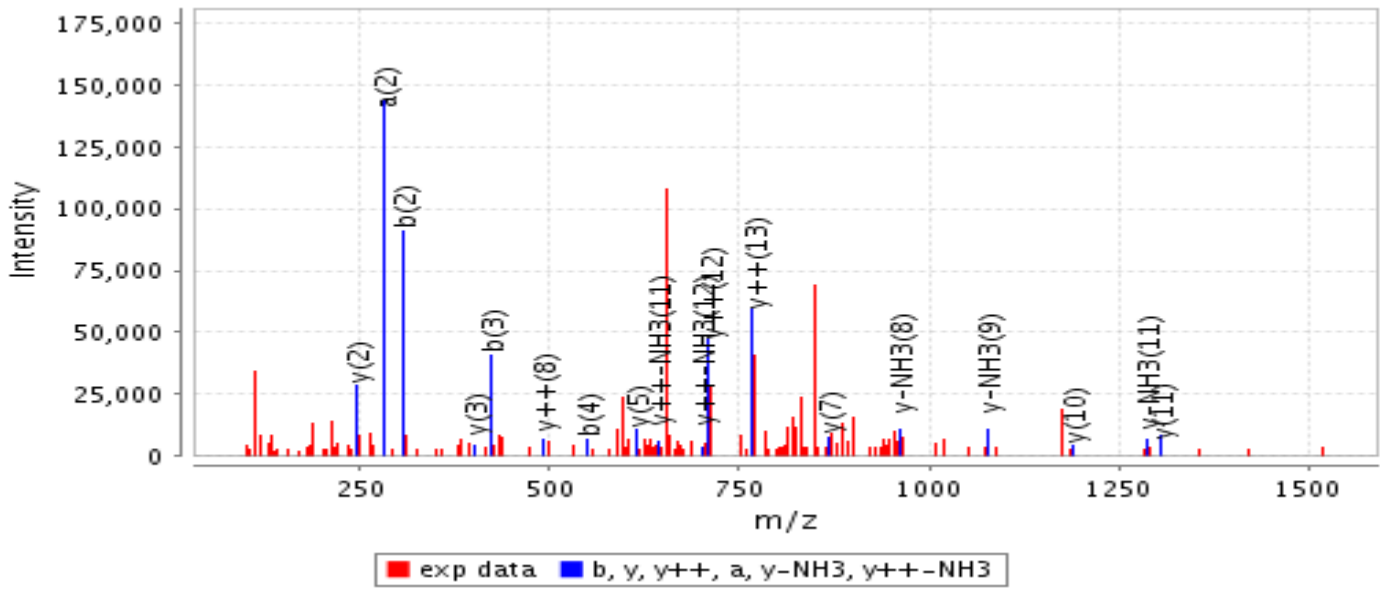

Serum albumin E/LRDEGK(12Glu<sub>6</sub>)ASSAKQRLKCASLQKFG/E [M+5H]<sup>5+</sup> 548.89 m/z

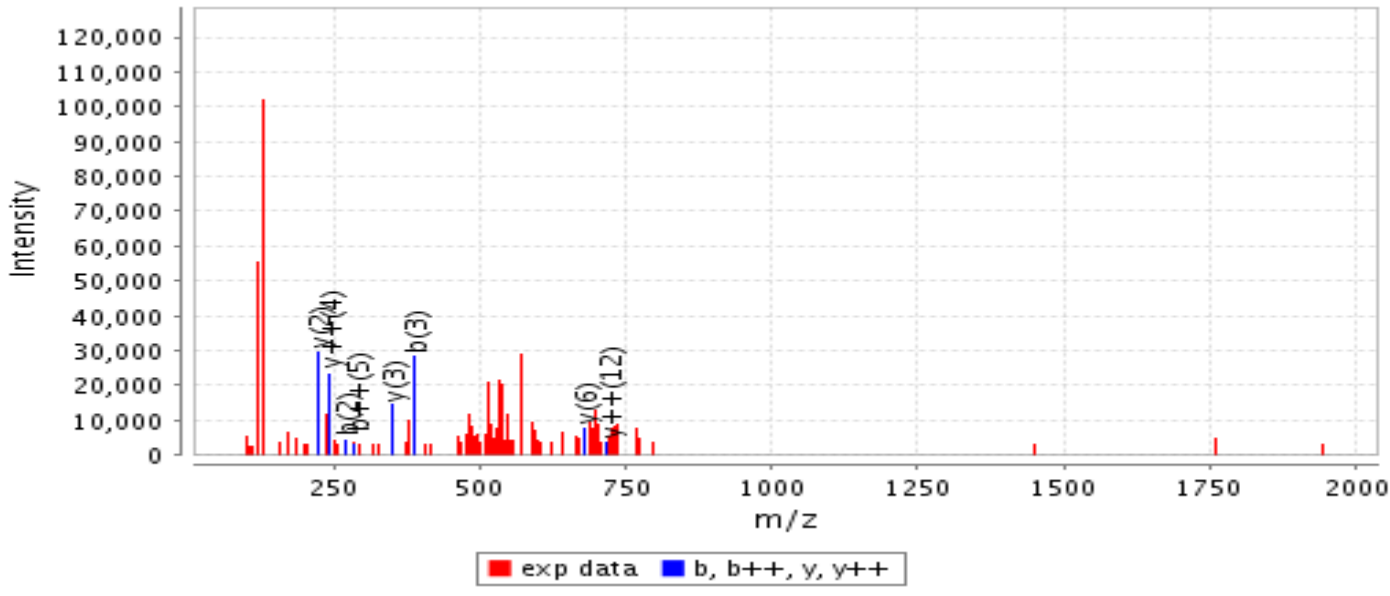





Serum albumin E/LRDEGKASSAK(<sup>12</sup>Glu<sub>6</sub>)QR(<sup>12</sup>Glu<sub>6</sub>)LKASLQKFGE/R [M+5H]<sup>5+</sup> 607.11 m/z

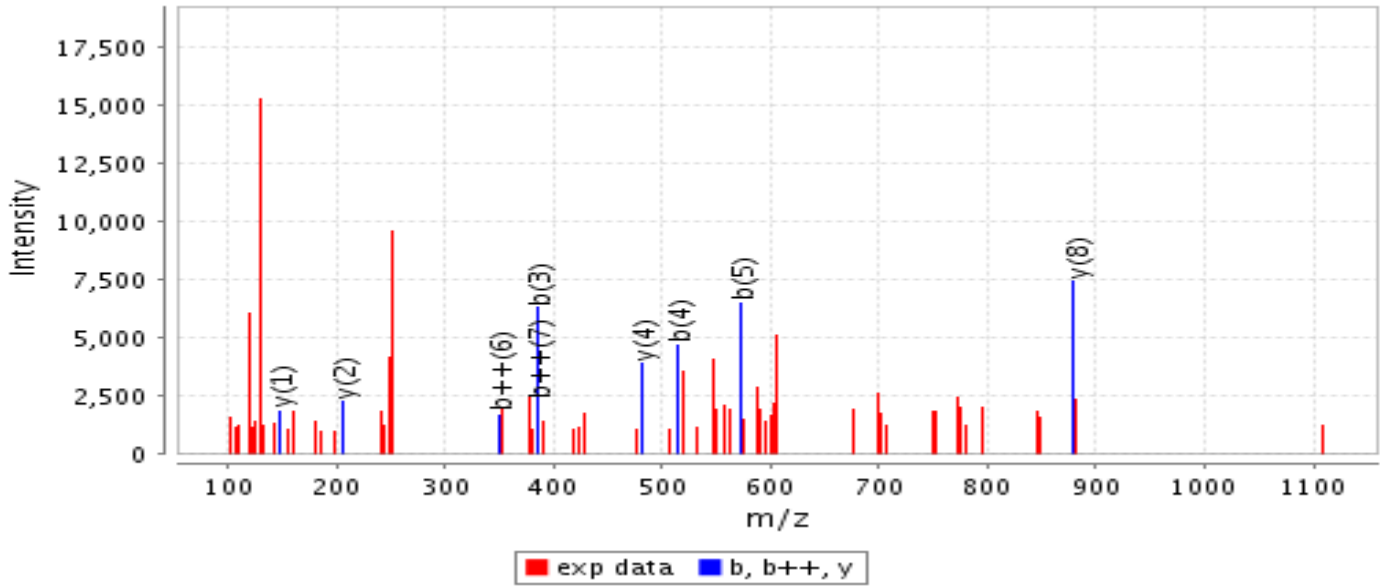

Serum albumin E/LRDEGKASSAKQR(<sup>12</sup>Glu<sub>6</sub>)LK(<sup>12</sup>Glu<sub>6</sub>)CASLQKFGE/R [M+5H]<sup>5+</sup> 607.11 m/z

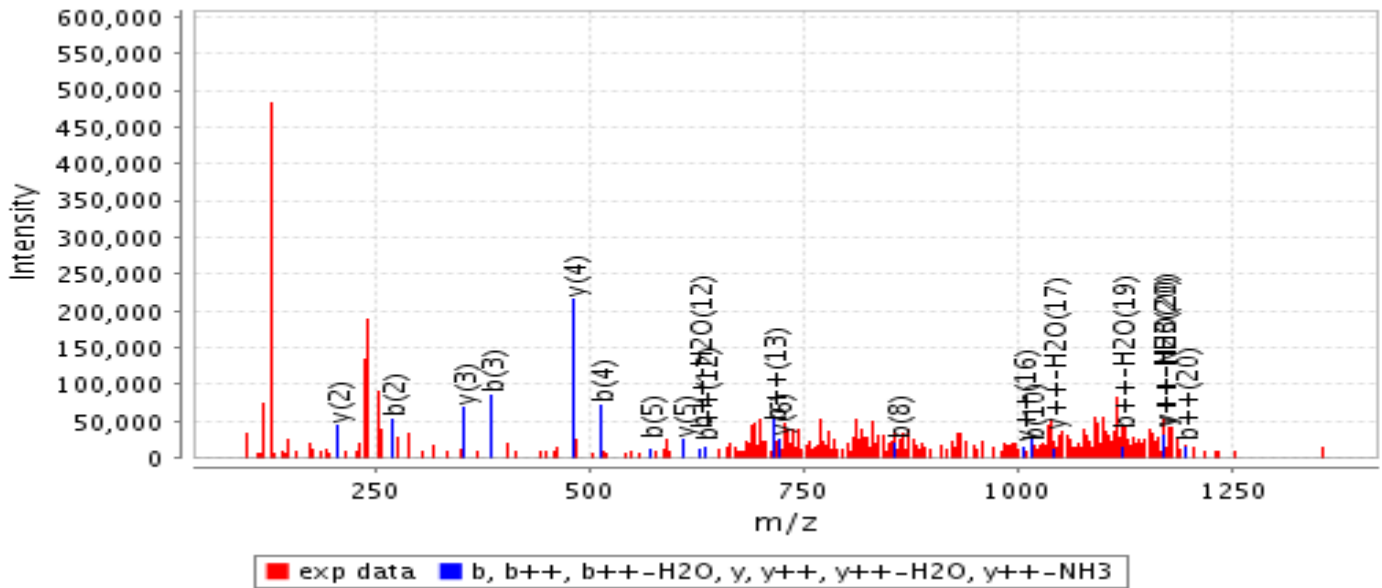

Serum albumin E/LRDEGKASSAKQR(<sup>12</sup>Glu<sub>6</sub>)LKASLQK(<sup>12</sup>Glu<sub>6</sub>)FGE/R [M+6H]<sup>6+</sup> 506.09 m/z

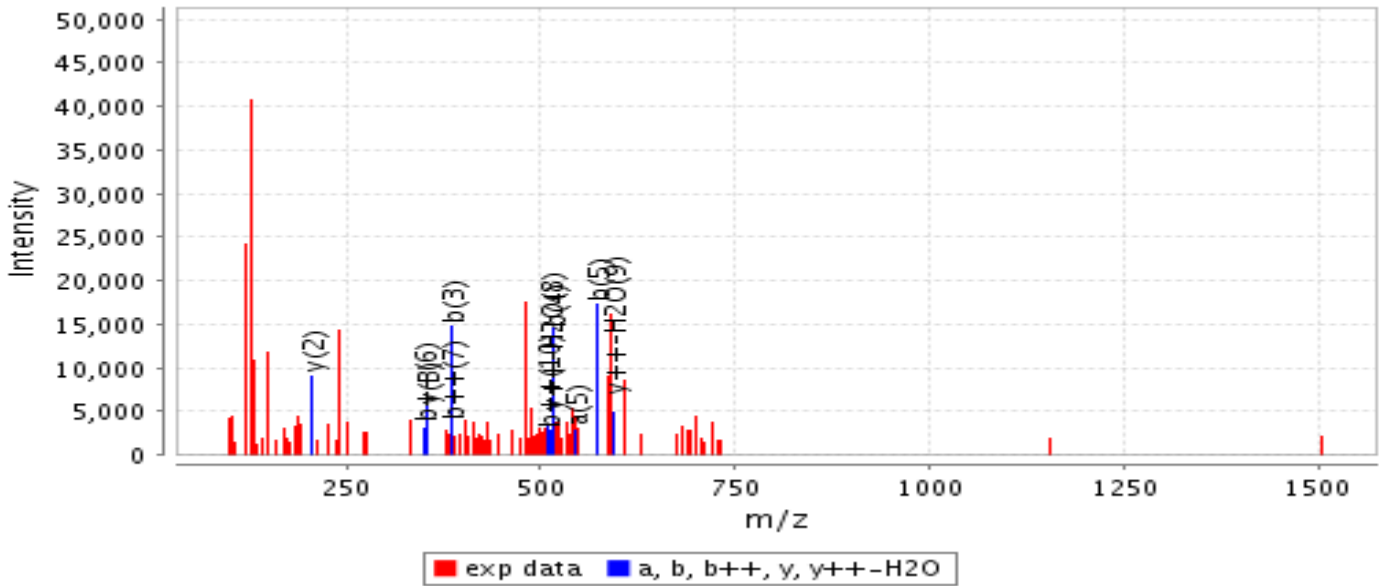

Serum albumin E/LRDEGKASSAKQR(<sup>12</sup>Glu<sub>6</sub>)LK(<sup>12</sup>Glu<sub>6</sub>)CASLQKFGE/R [M+5H]<sup>5+</sup> 607.11 m/z

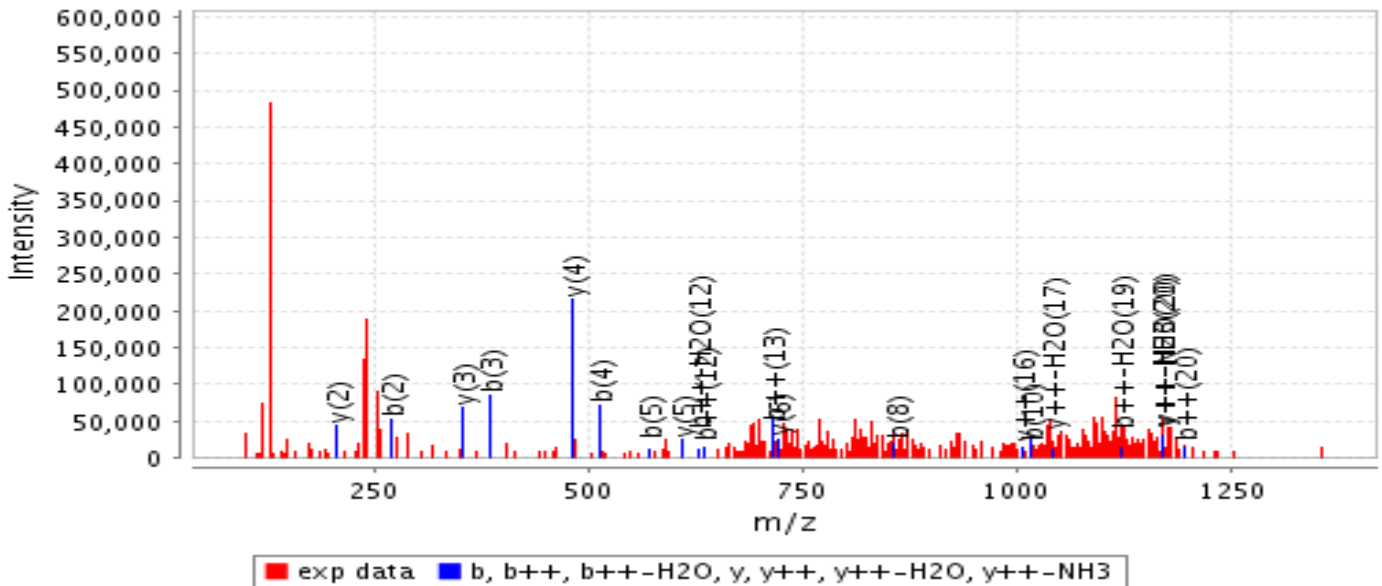

Serotransferrin A/VPDK(<sup>12</sup>Glu<sub>6</sub>)TVRWCAVSE/H [M+4H]<sup>4+</sup> 494.48 m/z

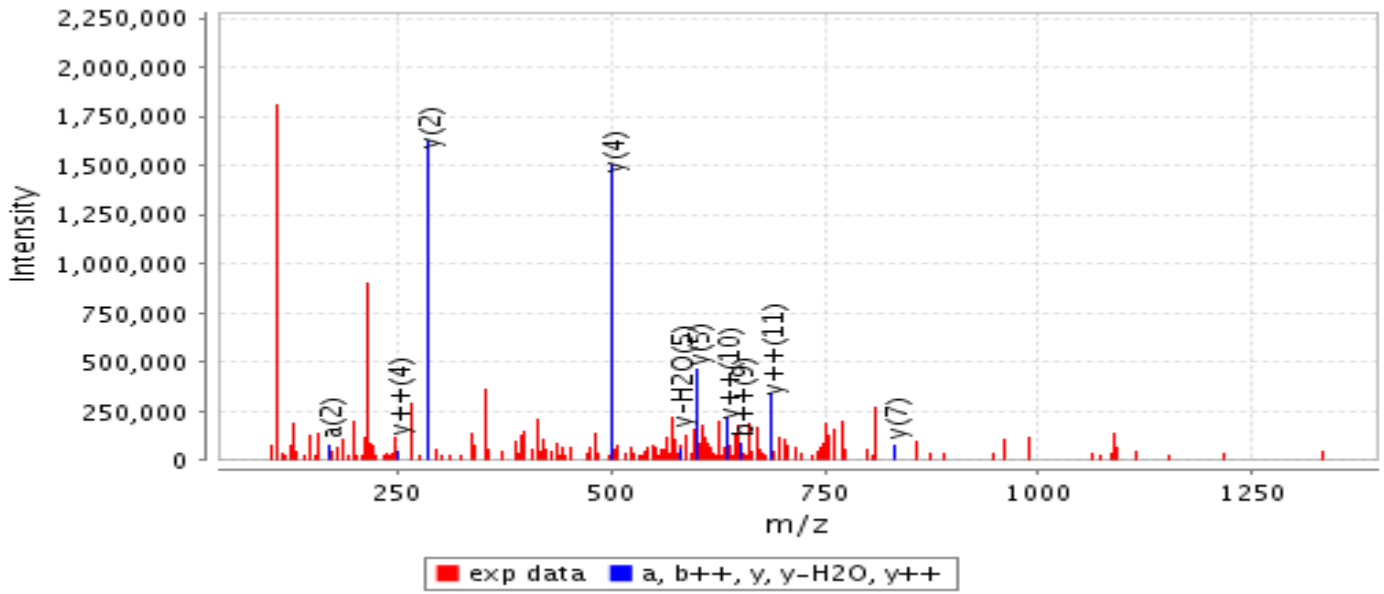

Serotransferrin E/YK(<sup>12</sup>Glu<sub>6</sub>)DCHLAQVPSHTVVARSMGGKEDLIWE/L [M+5H]<sup>5+</sup> 678.53 m/z

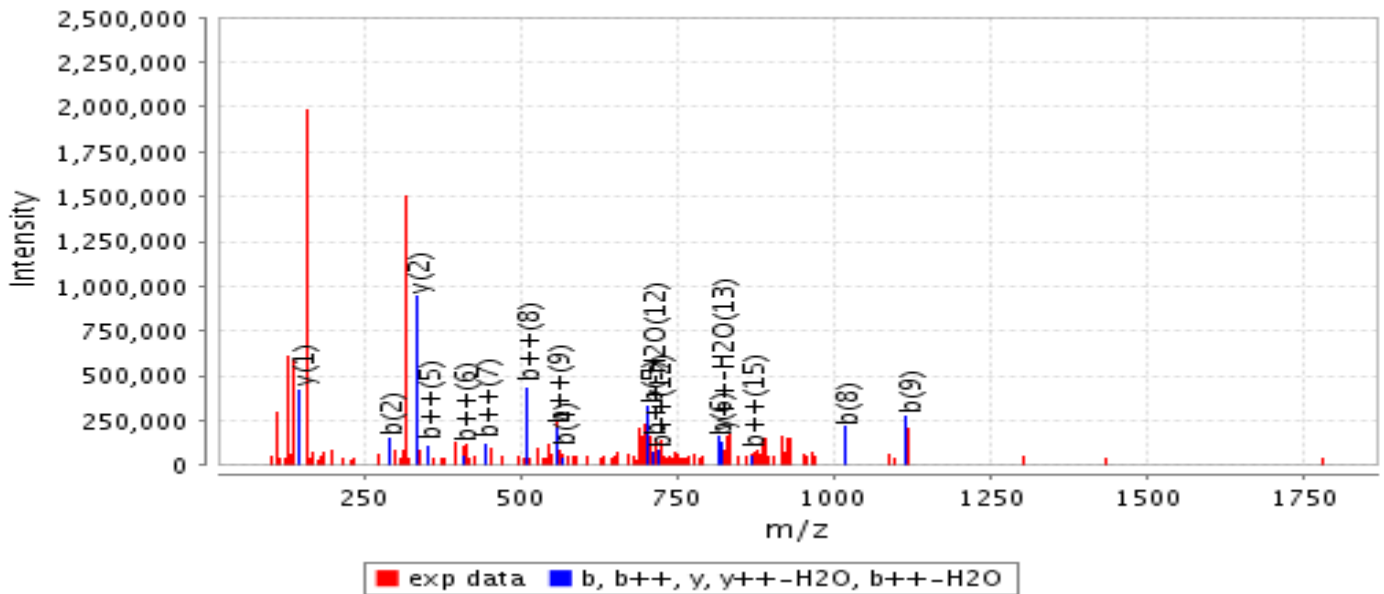

Titin R/EVSRKTWTK(<sup>12</sup>Glu<sub>6</sub>)VMD/F [M+3H]<sup>3+</sup> 547.94 m/z

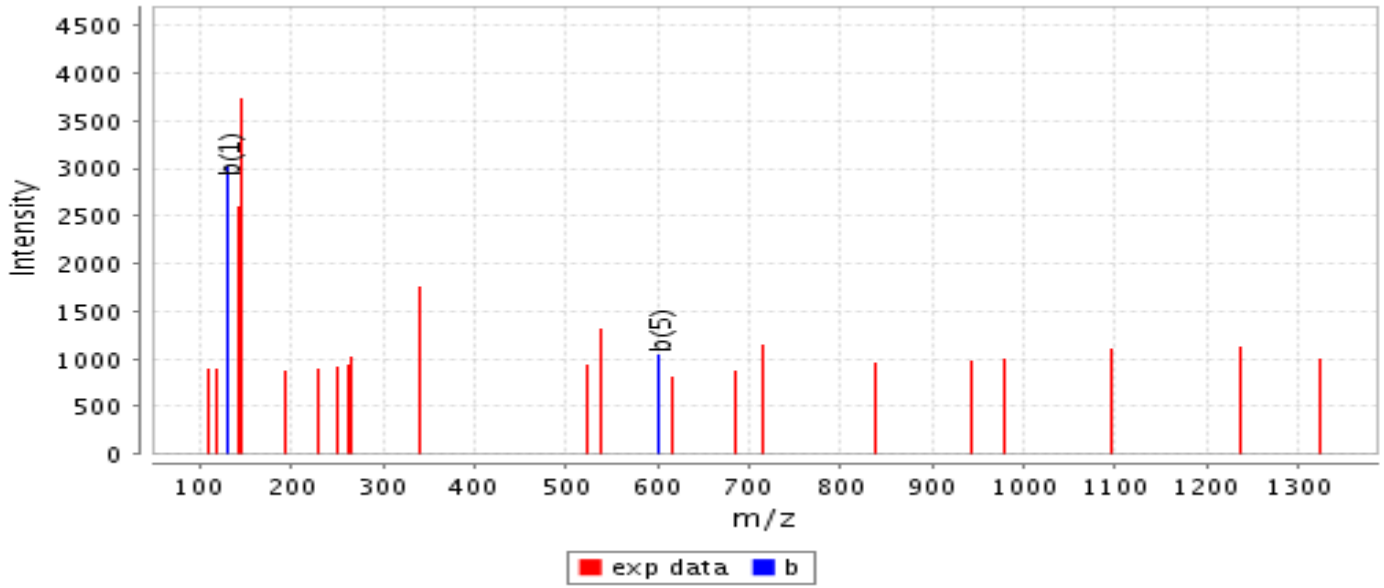

Haptoglobin  $\beta$  chain E/HSVR(<sup>12</sup>Glu<sub>6</sub>)YQCKNYYKLRT/E/G [M+4H]<sup>4+</sup> 537.02 m/z

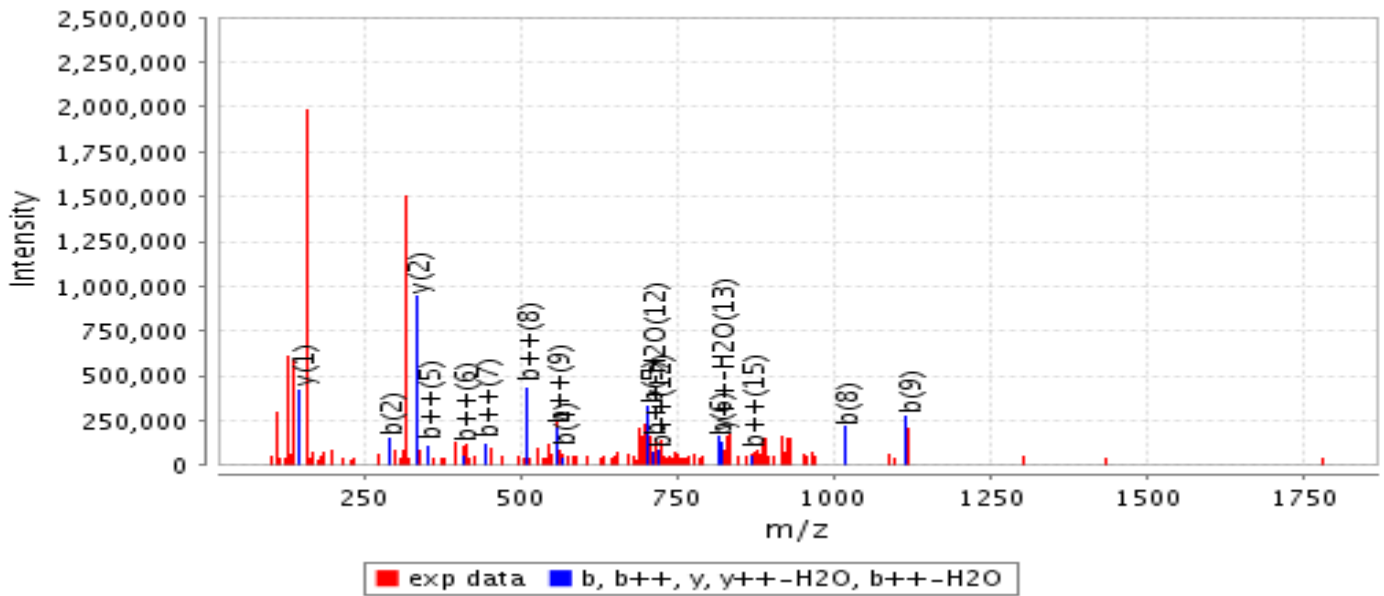

Apolipoprotein A-I E/VK(<sup>12</sup>Glu<sub>6</sub>)AKVQPYLDDFQKKWQEE/M [M+3H]<sup>3+</sup> 847.77 m/z

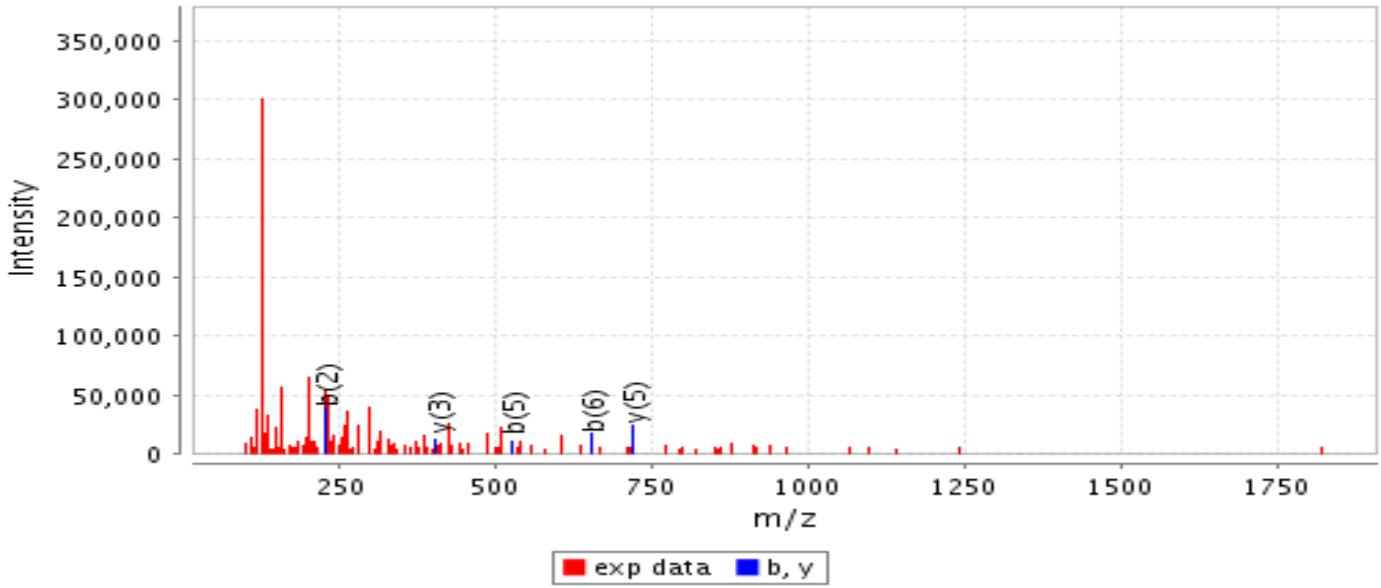

Apolipoprotein A-I E/VKAK(<sup>12</sup>Glu<sub>6</sub>)VQPYLDDFQKKWQEE/M [M+4H]<sup>4+</sup> 847.77 m/z

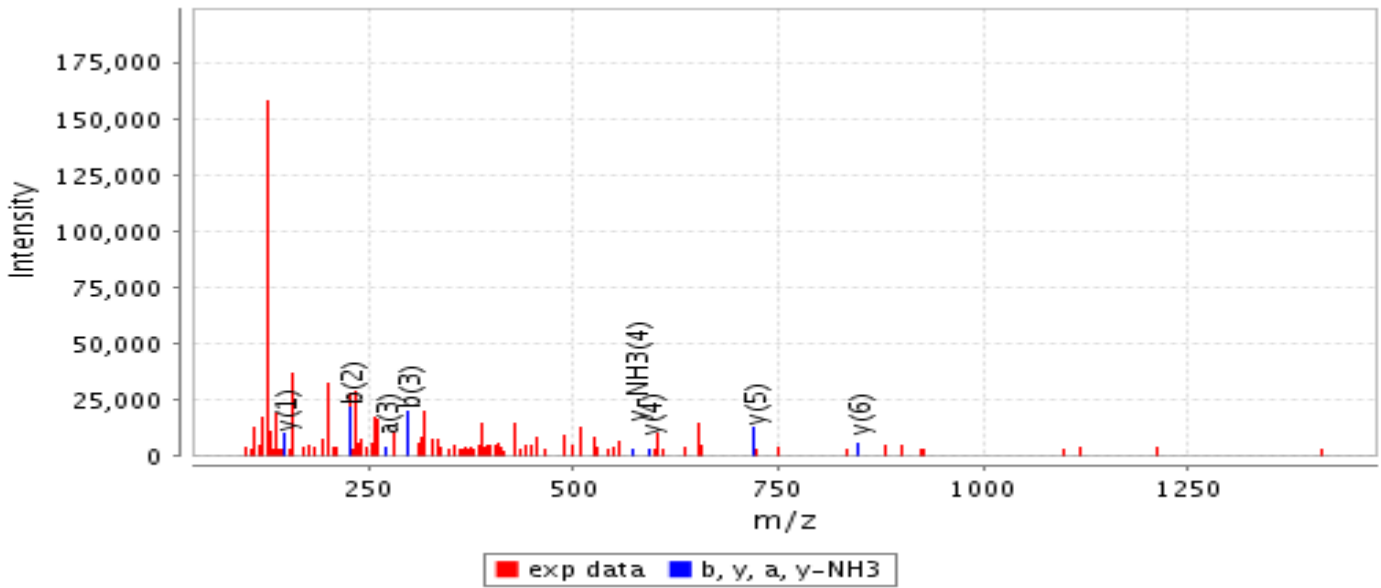

Plasmin light chain B E/LCDIPRCTTPPPSSGPTYQCLK(<sup>12</sup>Glu<sub>6</sub>)GTGE/N [M+3H]<sup>3+</sup> 1018.80 m/z

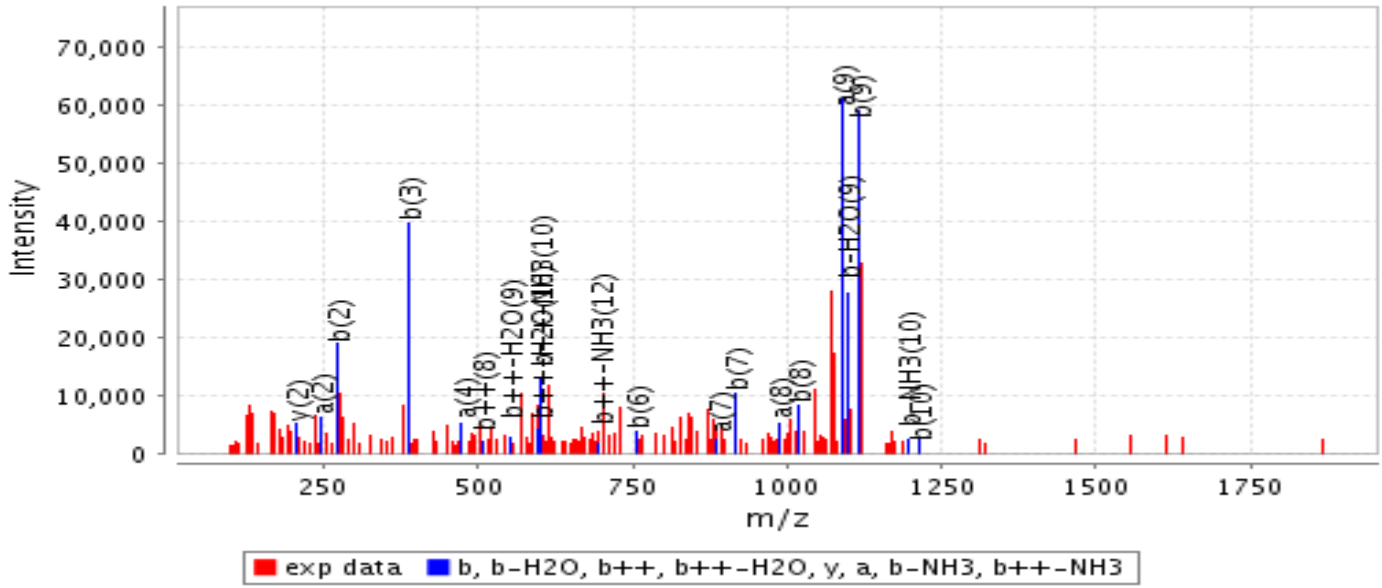

Girdin S/EVSR(<sup>12</sup>Glu<sub>6</sub>)YK(<sup>12</sup>Glu<sub>6</sub>)E/R [M+3H]<sup>3+</sup> 412.19 m/z

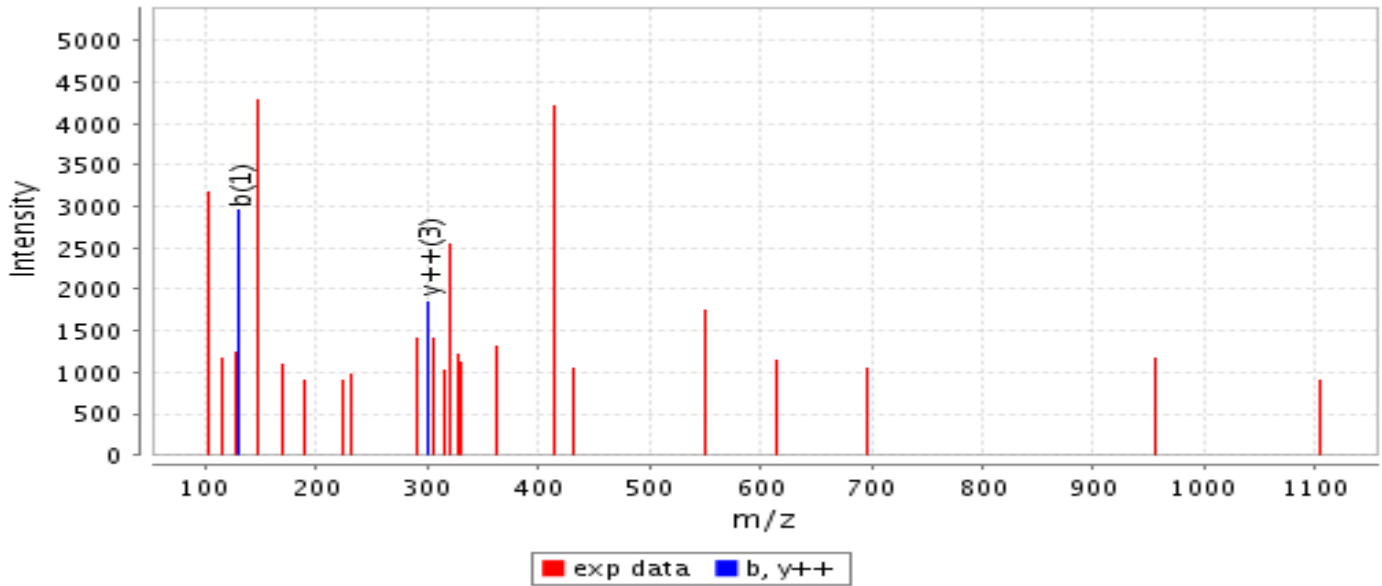

Complement factor H E/MHCSDDGFWSK(<sup>12</sup>Glu<sub>6</sub>)EKPKCVE/I [M+4H]<sup>4+</sup> 601.26 m/z

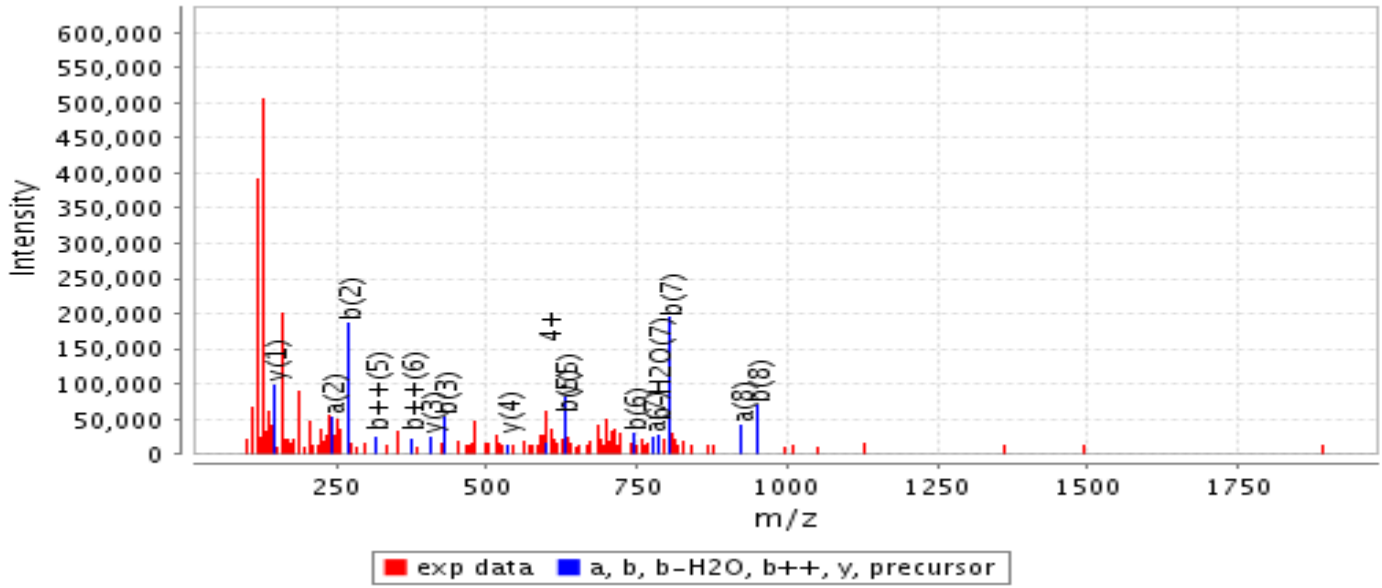

Ig κ chain C region E/VTHQGLSSPVTK(<sup>12</sup>Glu<sub>6</sub>)SFNRGEC/- [M+3H]<sup>3+</sup> 756.03 m/z

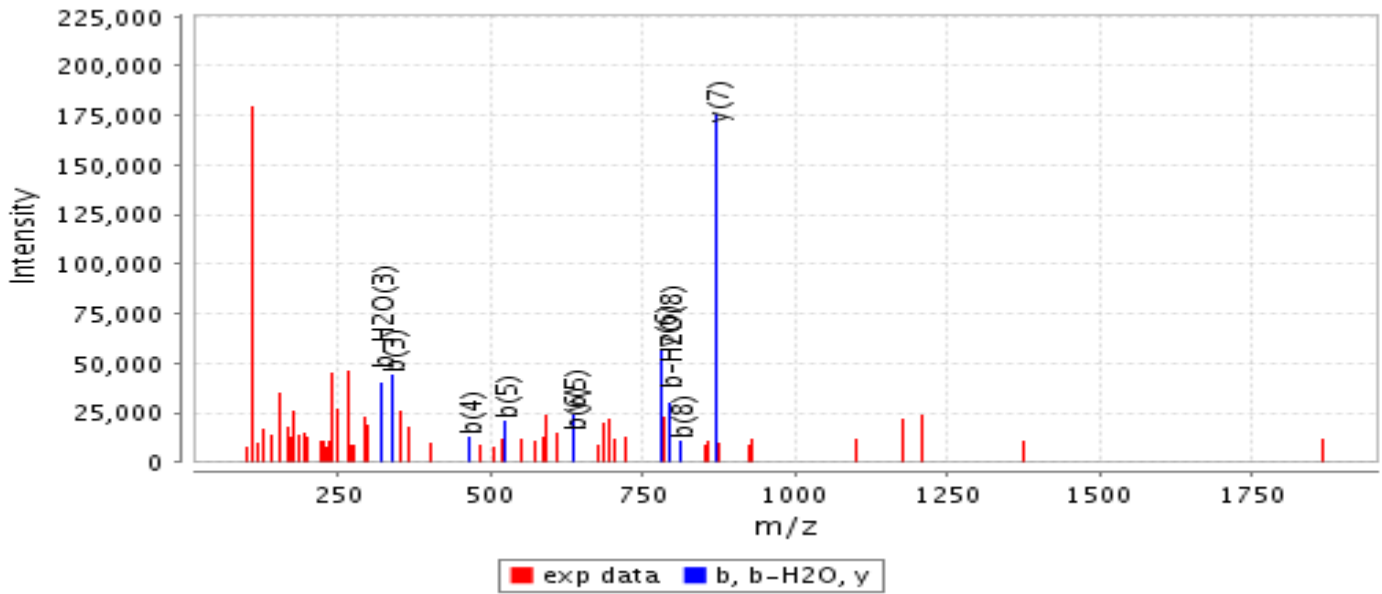

Nebulette D/AAYK(<sup>12</sup>Glu<sub>6</sub>)GVHPHIVEMDRRPGII/V [M+4H]<sup>4+</sup> 601.26 m/z

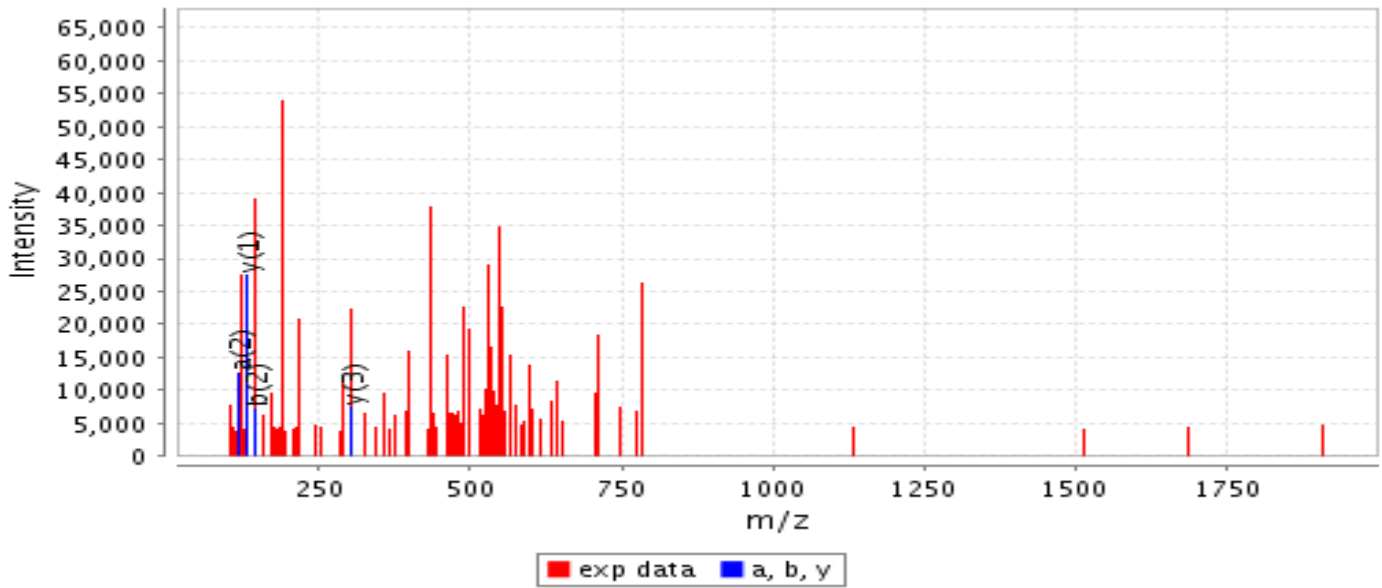

Fibrinopeptide A E/SSSHHPGIAEFPSRGKSSSYSK(<sup>12</sup>Glu<sub>6</sub>)QFTSSTSYNRGDSTFE/S [M+5H]<sup>5+</sup> 861.39 m/z

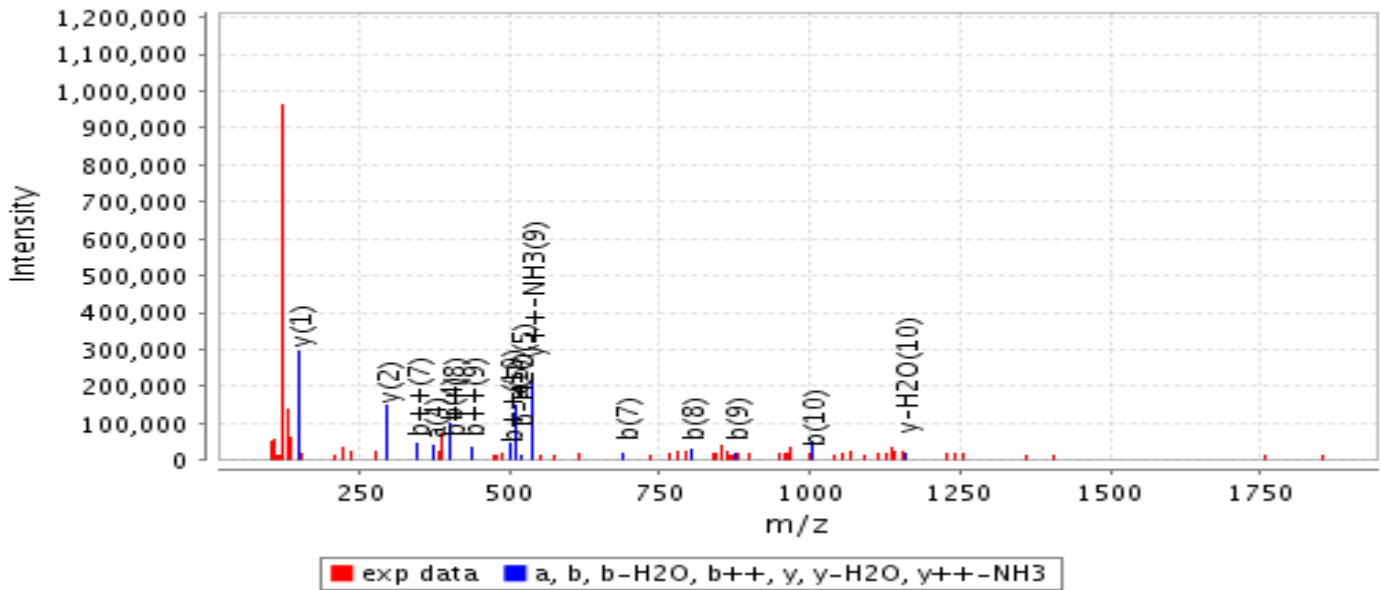



Protein max F/QSAADK(<sup>12</sup>Glu<sub>6</sub>)RAHHNALERKRRD/H [M+5H]<sup>5+</sup> 485.06 m/z

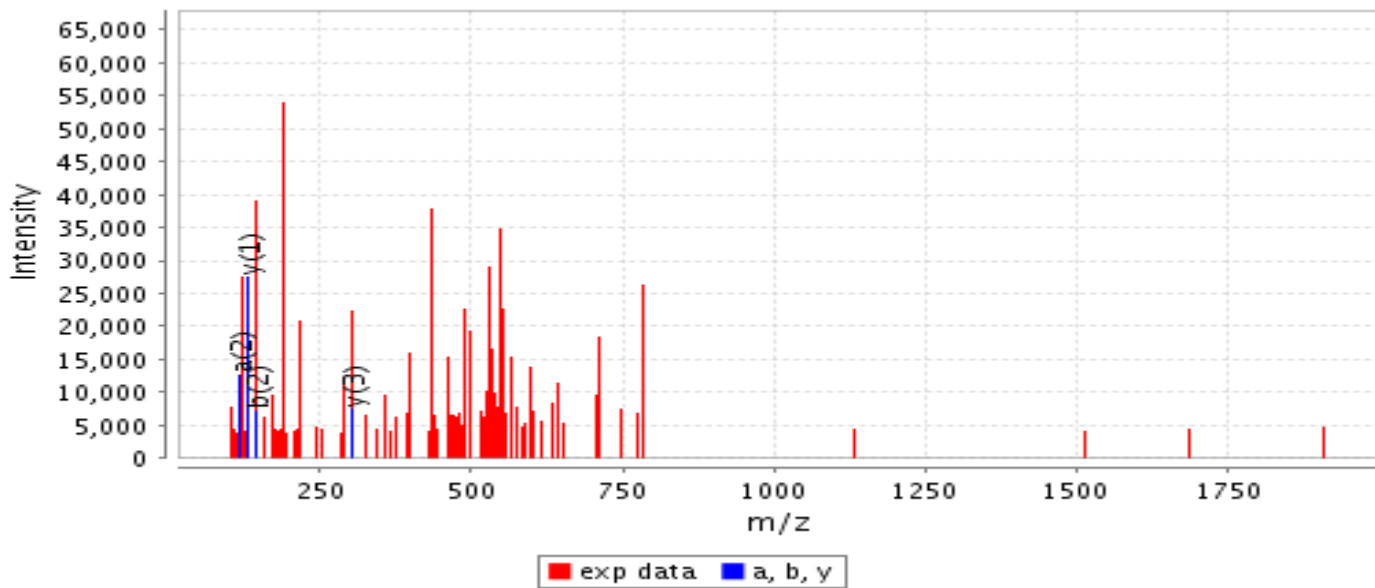

Supplement: supp_M900439-MCP200_Supplementary_spectradata.pdf [file supp_M900439-MCP200_Supplementary_spectradata.pdf]
