# Supplementary material
Source: PubMed Central journal article supplement (PMC2849708)
Supplement: supp_M900439-MCP200_Supplementary_Tables1_and_2.pdf [file supp_M900439-MCP200_Supplementary_Tables1_and_2.pdf]

# **Glycation Isotopic Labelling (GIL) with $^{13}\text{C}$ -reducing Sugars for Quantitative Analysis of Glycated Proteins in Human Plasma\***

**Feliciano Priego-Capote<sup>1</sup>, Alexander Scherl<sup>1</sup>, Markus Müller<sup>2</sup>, Patrice Waridel<sup>3</sup>, Frédérique Lisacek<sup>2</sup>, Jean-Charles Sanchez<sup>1</sup>**

<sup>1</sup>Biomedical Proteomics Research Group (BPRG), Department of Structural Biology and Bioinformatics, University Medical Centre, University of Geneva, 1211 Geneva 4, Switzerland.

<sup>2</sup>Proteome Informatics Group (PIG), Department of Structural Biology and Bioinformatics, University Medical Center, University of Geneva, 1211 Geneva 4, Switzerland.

<sup>3</sup>Center for Integrative Genomics, University of Lausanne, Quartier Sorge, 1015 Lausanne-Dorigny, Switzerland.

Correspondence to: Jean-Charles Sanchez, Biomedical Proteomics Research Group, DBSB/CMU, Rue Michel Servet, 1, CH-1211 Geneva 4, Switzerland.

Tel: +41 (0) 22 379 59 06, Fax: +41 (0) 22 379 59 84, [jean-charles.sanchez@unige.ch](mailto:jean-charles.sanchez@unige.ch)

**Supplementary table 1:** Glycated proteins identified in plasma analysis with information about the glycation sites and m/z value of the precursor ion corresponding to the glycated peptides. Quantitative data are based on peak area ratio between  $^{12}\text{C}_6$ - and  $^{13}\text{C}_6$ -glucose labelled peptides with standard deviation estimated by measurement of three analytical replicates. The last two columns indicate the MS-mode that detected each peptide.

| Protein       | Peptide                              | gly site | charge | m/z 12Glu | Peak area ratio | SD     | HCD | NL |
|---------------|--------------------------------------|----------|--------|-----------|-----------------|--------|-----|----|
| Serum albumin | I/AFAQYLQQCPFEDHVKLVNE/V             | K65      | 3      | 867.08    | 0.5569          | 0.0136 |     | X  |
|               | E/VTEFAKTCVADESAE/N                  | K75      | 2      | 909.9     | 1.0333          | 0.1127 |     | X  |
|               | E/NCDKSLHTLFGDKLCTVATLRE/T           | K88      | 3      | 914.45    | 0.9077          | 0.0149 | X   | X  |
|               | E/SAENCDSLHTLFGDKLCTVATLRE/T         | K97      | 3      | 1009.82   | 0.9810          | 0.0330 | X   | X  |
|               | E/TYGEMADCCAKQEPERNE/C               | K117     | 3      | 783.98    | 0.6590          | 0.0076 | X   |    |
|               | E/RNECFLQHKDDNPRLRVRPE/V             | K130     | 5      | 582.69    | 0.2505          | 0.0553 | X   |    |
|               | C/TAFHDNEETFLKKYLYE/I                | K160     | 4      | 578.28    | 0.9956          | 0.0142 | X   | X  |
|               | E/VDVMCTAFHDNEETFLKKYLYE/I           | K161     | 3      | 972.45    | 0.9949          | 0.0101 |     | X  |
|               | E/LLFFAKRYKAAFTECCQAADKAAACLLPKLDE/L | K183     | 2      | 934       | 0.8818          | 0.0236 | X   |    |
|               | E/CCQAADKAAACLLPKLDE/L               | K198     | 3      | 708.99    | 0.7086          | 0.0032 | X   |    |
|               | E/CCQAADKAAACLLPKLDELRLDE/G          | K205     | 3      | 880.08    | 0.3667          | 0.0060 | X   |    |
|               | E/LRDEGKASSAKQRLKCASLQKFGE/R         | K219     | 5      | 574.7     | 0.8248          | 0.0110 | X   | X  |
|               | E/RAFKAWAVARLSQRFPKAE/F              | R242     | 3      | 798.77    | 0.1415          | 0.0152 | X   | X  |
|               | E/VSKLVTDLTKVHTE/C                   | K257     | 3      | 577.98    | 1.2937          | 0.0124 | X   | X  |
|               | E/VSKLVTDLTKVHTECHGDLLE/C            | K264     | 3      | 906.08    | 1.3840          | 0.0126 | X   | X  |
|               | E/CADDRADLAKYICE/N                   | K286     | 2      | 931.4     | 0.6850          | 0.0282 | X   |    |
|               | E/NQDSISSKLE/C                       | K298     | 6      | 705.85    | 0.5170          | 0.0087 |     | X  |
|               | E/AKDVFLGMFLYE/Y                     | K347     | 2      | 805.89    | 0.4879          | 0.0933 |     | X  |
|               | E/KCCAAADPHECYAKVFDE/F               | K383     | 3      | 778.32    | 0.7851          | 0.2300 | X   | X  |
|               | D/PHECYAKVFDE/F                      | K396     | 3      | 778.65    | 0.6628          | 0.0057 |     | X  |
|               | E/FKPLVEEPQNLIKQNC/L                 | K402     | 3      | 750.04    | 0.6924          | 0.0045 | X   | X  |
|               | E/FKPLVEEPQNLIKQNC/L                 | K413     | 3      | 750.04    | 0.6924          | 0.0045 | X   |    |
|               | E/LFEQLGEYKFN                        | K426     | 2      | 782.38    | 0.7172          | 0.0036 |     | X  |
|               | Q/NALLVRYTKKVPQVSTPTLVE/V            | K437     | 2      | 1259.71   | 0.3781          | 0.0199 | X   | X  |
|               | E/VSRLGKVGSKCKHPE/A                  | K456     | 4      | 530.26    | 0.7064          | 0.0476 | X   |    |

|                     |                                   |      |   |         |        |        |   |   |
|---------------------|-----------------------------------|------|---|---------|--------|--------|---|---|
|                     | E/VSRLGKVGSKCCKHPE/A              | K460 | 4 | 530.26  | 0.6713 | 0.0275 | X | X |
|                     | E/VSRLGKVGSKCCKHPE/A              | K463 | 4 | 530.26  | 0.6713 | 0.0275 | X | X |
|                     | H/PEAKRMPCAEYLSVVLNQLCVLHE/K      | K468 | 3 | 1050.94 | 0.5233 | 0.1586 | X |   |
|                     | E/KTPVSDRVTKCCTE/S                | K490 | 3 | 614.96  | 0.8258 | 0.0377 |   | X |
|                     | E/KTPVSDRVTKCCTE/S                | R496 | 3 | 614.96  | 0.7236 | 0.0064 | X |   |
|                     | E/KTPVSDRVTKCCTE/S                | K499 | 3 | 614.96  | 0.8734 | 0.0311 | X |   |
|                     | E/SLVNRRPCFSALEVDETYVPKEFNAE/T    | K524 | 3 | 1078.19 | 0.5799 | 0.1059 | X |   |
|                     | E/TFTFHADICTLSEKE/R               | K543 | 3 | 654.3   | 0.4466 | 0.0101 | X | X |
|                     | E/RQIKKQTALVE/L                   | K549 | 3 | 492.62  | 1.4990 | 0.0226 |   | X |
|                     | E/GKKLVAAASQAALGL/-               | K597 | 2 | 745.44  | 0.8320 | 0.1510 |   | X |
| Serotransferrin     | E/LLCLDNTRKPVDE/Y                 | K252 | 2 | 846.43  | 0.3625 | 0.0484 |   | X |
|                     | E/YKDCHLAQVPSHTVVARSMGGKEDLIWE/L  | K278 | 3 | 1130.21 | 0.3978 | 0.0208 | X |   |
|                     | E/FQLFSSPHGKDLLFK/D               | K315 | 3 | 643.01  | 0.9035 | 0.0459 |   | X |
|                     | E/CKPVKWCALSHHE/R                 | K359 | 4 | 454.21  | 0.6489 | 0.0294 | X |   |
|                     | E/RLKCDEWSVNSVGKIE/C              | K384 | 3 | 814.03  | 0.5152 | 0.0767 | X |   |
|                     | E/FFSEGCAPGSKKDSSLCKLC/M          | K508 | 3 | 814.37  | 0.8316 | 0.1272 | X |   |
|                     | E/GCAPGSKKDSSLCKLCMGSLNLCPEPNKE/G | K515 | 4 | 869.14  | 0.4677 | 0.1429 | X |   |
|                     | E/KGDVAFVKHQTPVQNTGGKN/P          | K553 | 4 | 572.55  | 0.3167 | 0.0400 | X |   |
|                     | E/KGDVAFVKHQTPVQNTGGKNPDPWAKN/L   | K564 | 4 | 774.64  | 0.2980 | 0.0166 | X |   |
|                     | E/LLCLDGTRKPVVEE/Y                | K588 | 2 | 846.43  | 0.3625 | 0.0484 |   | X |
|                     | E/YVKAVGNLRKCSTSSLE/A             | K676 |   | 1094.57 | 0.5894 | 0.0650 |   | X |
| Apolipoprotein A-I  | /DEPPQSPWDRVKD/L                  | K12  | 2 | 866.4   | 1.2085 | 0.0143 |   | X |
|                     | E/GSALGKQLNLKLLDNWDSVTSTFSKLR/Q   | K45  | 4 | 821.44  | 0.6681 | 0.0626 | X |   |
|                     | E/QLGPVTQEFWDNLEKE/T              | K77  | 2 | 1048.49 | 1.0091 | 0.1084 |   | X |
|                     | E/VKAKVQPYLDDFQKKWQEE/M           | K106 | 4 | 636.08  | 0.8426 | 0.0171 | X |   |
|                     | E/MELYRQKVEPLRAE/L                | R116 | 4 | 481.75  | 0.6045 | 0.0453 | X |   |
|                     | E/LYRQKVEPLRAELQE/G               | K118 | 2 | 1018.05 | 0.5479 | 0.0683 |   | X |
|                     | E/SFKVSFLSALEE/Y                  | K226 | 2 | 759.88  | 0.4792 | 0.0703 |   | X |
| Haptoglobin β chain | K/KQWINKAVGDKLPECE/A              | K72  | 2 | 1039.52 | 0.4452 | 0.0774 |   | X |
|                     | K/KQWINKAVGDKLPE/C                | K77  | 4 | 447.74  | 0.3599 | 0.0226 | X |   |
|                     | E/KQWINKAVGDKLPECE/A              | K82  | 3 | 693.01  | 0.5140 | 0.0350 | X |   |
|                     | E/AVCGKPKNPANPVQR/I               | K151 | 4 | 450.24  | 0.5414 | 0.0986 | X |   |

|                                         |                                             |       |   |         |        |        |   |   |
|-----------------------------------------|---------------------------------------------|-------|---|---------|--------|--------|---|---|
|                                         | E/RVMPICLPSKDYAE/V                          | K270  | 2 | 920.94  | 0.5499 | 0.0602 |   | X |
|                                         | E/GSTVPEKIKTPKSPVGVQPILNE/H                 | K321  | 2 | 1234.67 | 0.5113 | 0.0881 |   | X |
| $\alpha$ -1-antitrypsin                 | E/NELTHDIITKFLNE/E                          | K298  | 2 | 868.45  | 0.7833 | 0.1376 |   | X |
|                                         | E/EAPLKLKSAVHKAVLTIDEKGE/A                  | K352  | 3 | 880.49  | 0.6272 | 0.1355 | X |   |
|                                         | E/EAPLKLKSAVHKAVLTIDEKGE/A                  | K355  | 3 | 880.49  | 0.3997 | 0.0495 | X |   |
|                                         | E/QNTKSPLFMGKVVNPTQK/-                      | K404  | 3 | 727.05  | 0.4994 | 0.0506 | X |   |
|                                         | N/TKSPLFMGKVVNPTQK/-                        | K411  | 3 | 646.35  | 0.5308 | 0.0721 | X |   |
| Apolipoprotein A-II                     | E/AKSYFEKSKEQLTPLIKKAGTE/L                  | K44   | 3 | 886.81  | 0.4970 | 0.0134 | X |   |
|                                         | E/AKSYFEKSKEQLTPLIKKAGTE/L                  | K46   | 3 | 886.81  | 0.3843 | 0.0748 | X |   |
|                                         | E/KSKEQLTPLIKKAGTE/L                        | K54   | 3 | 645.03  | 0.5126 | 0.0315 | X |   |
| Haptoglobin-related protein             | KQWINKAVGDKLPECE                            | K77   | 3 | 693.01  | 0.5008 | 0.0059 | X |   |
|                                         | KQWINKAVGDKLPECE                            | K82   | 3 | 693.01  | 0.5008 | 0.0059 | X |   |
|                                         | AVCGKPKNPANPVQR                             | K151  | 4 | 450.24  | 0.5414 | 0.0986 | X |   |
| Ig $\gamma$ -1 chain C region           | E/LLGGPSVFLFPPKPKDMLMISRTPE/V               | K129  | 3 | 968.19  | 0.5690 | 0.0102 | X |   |
|                                         | E/YKCKVSNKALPAPIEKTISKAKGQPREPQVYTLPPSRDE/L | K221  | 6 | 765.25  | 0.3638 | 0.0409 | X |   |
| $\beta$ -2-glycoprotein 1               | ./GRTCPKPDDLPFSTVVPLKTFYEPGEE/I             | K19   | 3 | 704.33  | 0.3302 | 0.0683 | X |   |
|                                         | E/HSSLAFWKTDASDVKPC/-                       | K317  | 4 | 811.15  | 0.4049 | 0.0647 | X |   |
| Complement factor H                     | E/VVKCLPVTAPENGIKIVSSAMEPDRE/Y              | K138  | 4 | 723.11  | 0.5098 | 0.0870 | X |   |
|                                         | E/MHCSDDGFWSEKPKCVE/I                       | K182  | 4 | 601.26  | 0.4092 | 0.1363 | X |   |
|                                         | E/GFGIDGPAIAKCLGE/K                         | K954  | 2 | 833.9   | 1.0963 | 0.0439 |   | X |
|                                         | E/GNKRITCRNGQWSEPPKCLHPCVISRE/I             | K1130 | 5 | 689.13  | 0.5110 | 0.0738 | X |   |
| Complement C3c $\alpha'$ chain fragment | E/SPMYSIITPNILRLE/S                         | R35   | 2 | 955.5   | 0.1855 | 0.0148 |   | X |
|                                         | E/AHDAQGDVPVTVVHDFPGKKLVSSE/K               | K43   | 5 | 602.51  | 0.4982 | 0.0454 | X |   |
|                                         | R/SVQLTEKRMDKVGKYPKELRKCCCE/D               | K660  | 3 | 1048.87 | 0.5759 | 0.1235 | X |   |
|                                         | R/SVQLTEKRMDKVGKYPKELRKCCCE/D               | K663  | 3 | 1048.87 | 0.5454 | 0.1140 | X |   |
|                                         | E/ACKKVFLDCCNYITE/L                         | K721  | 2 | 1042.46 | 0.4732 | 0.0451 |   | X |
| Ig $\gamma$ -4 chain C region           | L/FPPKPKDMLMISRTPE/V                        | K126  | 4 | 734.89  | 0.7074 | 0.0589 | X |   |

|                                          |                                           |                |   |         |        |        |   |   |
|------------------------------------------|-------------------------------------------|----------------|---|---------|--------|--------|---|---|
| Histidine-rich glycoprotein              | E/SCPGKFKSGFPQVSMFFHTFPK/-                | K489           | 4 | 706.84  | 0.3392 | 0.0793 | X |   |
| Ugl-Y3                                   | E/FKCDPHEATCYDDGKTYHVGE/Q                 | K1922          | 4 | 673.78  | 0.5242 | 0.0716 | X |   |
| $\alpha$ -2-HS-glycoprotein chain B      | E/TTCHVLDPTPVARCSVRQLKE/H                 | R81            | 3 | 877.11  | 0.7703 | 0.0188 | X |   |
|                                          | E/KQYGFCKATLSEKLGAE/V                     | K207           | 2 | 1075.53 | 0.8623 | 0.1190 |   | X |
|                                          | E/FTVSGTDCVAKE/A                          | K211           | 2 | 738.33  | 0.8080 | 0.0803 |   | X |
|                                          | E/KQYGFCKATLSEKLGAE/V                     | K213           | 3 | 717.02  | 0.5899 | 0.0474 | X |   |
| Ig $\gamma$ -2 chain C region            | N/FGTQTYTCNVDHKPSNTKVDKVE/R               | K88            | 4 | 733.85  | 0.4808 | 0.0295 | X |   |
|                                          | E/RKCCVECPPCAPPVAGPSVFLFPPKPKDTLMISRTPE/V | K125           | 5 | 900.45  | 0.2844 | 0.0173 | X |   |
| Fibrinopeptide B                         | E/YCRTPCTVSCNIPVVSQKECEE/I                | K195           | 3 | 936.4   | 0.3881 | 0.0301 | X |   |
| Spectrin $\beta$ chain, brain 1          | W/KSLLDACESRRVRLVD/T                      | R1893          | 3 | 693.7   | 1.2992 | 0.0484 | X |   |
| Ig $\alpha$ -1 chain C region            | E/SKTPLTATLSKSGNTRPE/V                    | K212           | 3 | 733.05  | 0.3304 | 0.0207 | X |   |
|                                          | E/SKTPLTATLSKSGNTRPE/V                    | K221           | 3 | 733.05  | 0.3304 | 0.0207 | X |   |
| Fibrinopeptide A                         | D/LVPGNFKSQLQKVPPEWKALTDMPQMRME/L         | K338           | 4 | 891.45  | 0.4513 | 0.0286 | X |   |
| $\alpha$ -2-macroglobulin                | ./SVSGKPYMVLVPSLLHTE/T                    | K5             | 3 | 749.72  | 0.3098 | 0.0251 | X |   |
| Afadin                                   | E/KRMQEF/R                                | R232           | 3 | 499.29  | 0.2904 | 0.0779 | X |   |
| Crooked neck-like protein 1              | K/EERLMLLE/S                              | R590           | 3 | 404.2   | 0.7511 | 0.1243 | X |   |
| A-kinase anchor protein 9                | E/KETIIIEELNTKIIIEE/E                     | K349           | 2 | 980.03  | 0.4504 | 0.0297 |   | X |
| Microtubule-actin cross-linking factor 1 | A/PDSQGKTDLTIQCD/M                        | R2341          | 3 | 595.99  | 1.2817 | 0.0371 |   | X |
|                                          | D/IKARAEEREI/K                            | K3901          | 2 | 688.39  | 0.7046 | 0.1619 |   | X |
| Plasmin light chain B                    | D/GKRAPWCHTTNSQVRWE/Y                     | K252/R253/R265 | 3 | 757.1   | 0.1447 | 0.0338 |   | X |

|                                                        |                             |             |   |         |        |        |   |
|--------------------------------------------------------|-----------------------------|-------------|---|---------|--------|--------|---|
| Myosin-15                                              | I/DIYLLEKSRVIFQQAGE/R       | K283 o R285 | 2 | 1125.05 | 0.6073 | 0.0136 | X |
| Hemopexin                                              | E/KGYPKLLQDEFPGIPSPLDAAVE/C | K103        | 2 | 1324.18 | 0.6199 | 0.0675 | X |
| Receptor-interacting serine/threonine-protein kinase 5 | E/LYESLMNIANRKQEE/M         | K412        | 2 | 1008.45 | 0.5191 | 0.1124 | X |
| Obscurin-like protein 1                                | D/GGFVLLKVLVYCQAKD/R        | K305        | 2 | 880.4   | 0.9896 | 0.0449 | X |
| Myomegalin                                             | D/LDTVAGLEKE/L              | K753        | 2 | 576.29  | 0.3370 | 0.0897 | X |
| UPF0639 protein                                        | E/YLDKLMEEETEE/L            | K169        | 2 | 750.41  | 0.4540 | 0.0628 | X |
| Ubiquitin carboxyl-terminal hydrolase 15               | D/KYQEELNFDNPLGMRGEI/A      | K292        | 3 | 750.04  | 0.6775 | 0.0310 | X |
| Rho GTPase-activating protein 10                       | E/KFRKEQLGAVKKEEKKK/F       | K128        | 2 | 1054.47 | 0.4989 | 0.0137 | X |
| Remodeling and spacing factor 1                        | D/RWEKYLIKYLCE/C            | R76         | 2 | 931.89  | 0.7567 | 0.0379 | X |

**Supplementary table 2:** Glycated proteins identified in plasma analysis with the prediction approach.

| Protein       | peptide                                                                            | gly site | charge | m/z<br>12Glu | Peak area<br>ratio | SD     | % increase |
|---------------|------------------------------------------------------------------------------------|----------|--------|--------------|--------------------|--------|------------|
| Serum albumin | I/AFAQYLQQCPFEDHVKLVNE/V                                                           | K65      | 3      | 867.08       | 3.4527             | 0.2841 | 82.25      |
|               | E/VTEFAKTCVADESAE/N                                                                | K75      | 2      | 909.90       | 4.2010             | 0.1189 | 62.54      |
|               | E/NCDKSLHTLFGDKLCTVATLRE/T                                                         | K88      | 4      | 685.84       | 1.7275             | 0.1213 | 280.38     |
|               | E/SAENCDSLHTLFGDKLCTVATLRE/T                                                       | K97      | 4      | 757.61       | 2.1800             | 0.0604 | 169.79     |
|               | E/TYEMADCCA <b>K</b> QEPERNE/C                                                     | K117     | 3      | 783.98       | 1.9826             | 0.1188 | 205.68     |
|               | E/RNECFLQHKDDNPRLPRLVLRPE/V                                                        | K130     | 5      | 582.69       | 1.8020             | 0.0553 | 250.15     |
|               | E/CFLQHKDDNPRLPRLVLRPE/V                                                           | R138     | 3      | 837.42       | 1.9867             | 0.0608 | 203.21     |
|               | C/TAFHDNEETFLK <b>K</b> YLYE/I                                                     | K160     | 4      | 578.27       | 2.6194             | 0.1890 | 124.69     |
|               | E/VDVMCTAFHDNEETFLK <b>K</b> YLYE/I                                                | K161     | 3      | 977.78       | 2.6362             | 0.2000 | 123.51     |
|               | E/LLFFAK <b>R</b> YKAAFTE/C                                                        | R184     | 2      | 934.50       | 2.5395             | 0.3140 | 134.13     |
|               | E/CCQAAD <b>K</b> AACLLPKLDE/L                                                     | K198     | 3      | 708.99       | 2.2734             | 0.0919 | 157.61     |
|               | E/CCQAAD <b>K</b> AACLLP <b>K</b> LDELRDDEGKASSAKQRLK <b>C</b> ASLQK <b>F</b> GE/R | K205     | 6      | 803.07       | 1.8450             | 0.0341 | 236.94     |
|               | E/LRDEG <b>K</b> ASSAKQRLK <b>C</b> ASLQK <b>F</b> GE/E                            | K214     | 5      | 548.89       | 2.0810             | 0.1205 | 186.52     |
|               | R/DEGKASSAKQRLK <b>C</b> ASLQK <b>F</b> GE/R                                       | K219     | 4      | 650.83       | 3.8603             | 0.2522 | 70.27      |
|               | E/LRDEGKASSAKQRLK <b>C</b> ASLQK <b>F</b> GE/R                                     | R221     | 5      | 574.70       | 2.4759             | 0.0206 | 135.53     |
|               | E/LRDEGKASSAKQRLK <b>C</b> ASLQK <b>F</b> GE/R                                     | K223     | 5      | 574.70       | 2.4759             | 0.0206 | 135.53     |
|               | E/LRDEGKASSAKQRLK <b>C</b> ASLQK <b>F</b> GE/E                                     | K229     | 5      | 548.89       | 2.0810             | 0.1205 | 186.52     |
|               | E/LRDEGKASSAKQRLK <b>C</b> ASLQK <b>F</b> GE/R                                     | K219R221 | 5      | 607.11       | 5.9930             | 0.1294 | 40.07      |
|               | E/LRDEGKASSAKQRLK <b>C</b> ASLQK <b>F</b> GE/R                                     | R221K223 | 5      | 607.11       | 5.9930             | 0.1294 | 40.07      |
|               | E/LRDEGKASSAKQRLK <b>C</b> ASLQK <b>F</b> GE/R                                     | R221K229 | 5      | 607.11       | 5.9930             | 0.1294 | 40.07      |
|               | E/RAFKAWAVAR <b>L</b> SQRFPKAE/F                                                   | R242     | 4      | 479.67       | 1.0863             | 0.0165 | 2379.77    |
|               | K/AWAVAR <b>L</b> SQRFPKAE/F                                                       | K249     | 3      | 631.67       | 2.4648             | 0.2580 | 139.15     |
|               | E/VS <b>K</b> LVDLTKVHTE/C                                                         | K257     | 3      | 577.98       | 4.8835             | 0.0635 | 51.51      |
|               | E/VS <b>K</b> LVDLTKVHTECCHGDLL <b>E</b> /C                                        | K264     | 3      | 906.11       | 4.5198             | 0.0700 | 56.84      |
|               | E/CADDRAD <b>LAK</b> YICE/N                                                        | K286     | 2      | 931.40       | 2.6254             | 0.0869 | 123.28     |
|               | E/NQDSISS <b>K</b> LKE/C                                                           | K298     | 2      | 705.85       | 2.3950             | 0.0849 | 143.73     |
|               | E/NQDSISS <b>K</b> LKECCEKPL <b>L</b> E/K                                          | K300     | 3      | 814.06       | 2.1797             | 0.3488 | 182.11     |
|               | E/NQDSISS <b>K</b> LKECCEKPL <b>L</b> E/K                                          | K305     | 3      | 814.06       | 2.1797             | 0.3488 | 182.11     |
|               | E/A <b>K</b> DVFLGMFLY <b>E</b> /Y                                                 | K347     | 2      | 805.89       | 2.7657             | 0.1946 | 114.25     |
|               | E/ <b>K</b> CCAAAD <b>P</b> HECYAKVFDE/F                                           | K383     | 3      | 778.32       | 3.3029             | 0.0262 | 86.85      |
|               | D/ <b>P</b> HECYAKVFDE/F                                                           | K396     | 3      | 778.32       | 3.3440             | 0.0298 | 85.33      |
|               | E/ <b>F</b> KPLVEEPQ <b>N</b> L <b>I</b> KQ <b>N</b> CE/L                          | K402     | 3      | 750.04       | 3.2217             | 0.0305 | 90.03      |

|                                   |           |   |         |        |        |        |
|-----------------------------------|-----------|---|---------|--------|--------|--------|
| E/FKPLVEEPQNLIKQNC/L              | K413      | 3 | 750.04  | 3.2217 | 0.0305 | 90.03  |
| E/LFEQLGEYKFKQ/N                  | K426      | 2 | 782.38  | 2.7954 | 0.0977 | 111.62 |
| Q/NALLVRYTKKVPQVSTPTLVE/V         | R434      | 2 | 1260.21 | 2.3466 | 0.1925 | 150.43 |
| R/YTKKVPQVSTPTLVE/V               | K437      | 2 | 927.00  | 3.8202 | 0.3883 | 71.82  |
| Q/NALLVRYTKKVPQVSTPTLVE/V         | K438      | 2 | 1260.21 | 2.3466 | 0.1925 | 150.43 |
| E/VSRNLGKVGSKCCKHPE/A             | K456      | 4 | 530.26  | 3.4084 | 0.3502 | 84.32  |
| E/VSRNLGKVGSKCCKHPE/A             | K460      | 4 | 530.26  | 3.4084 | 0.3502 | 84.32  |
| E/VSRNLGKVGSKCCKHPE/A             | K463      | 4 | 530.26  | 3.4084 | 0.3502 | 84.32  |
| E/KTPVSDRVTKCCTE/S                | K499      | 3 | 614.96  | 3.8699 | 0.0948 | 69.74  |
| E/SLVNRRPCFSALE/V                 | R508/R509 | 2 | 855.93  | 1.7271 | 0.0533 | 276.02 |
| E/SLVNRRPCFSALEVDETYVPKEFNAE/T    | K524      | 3 | 1078.19 | 1.9065 | 0.2118 | 229.47 |
| E/TFTFHADICTLSEKE/R               | K543      | 3 | 654.30  | 1.6370 | 0.0656 | 316.19 |
| E/RQIKKQTALVE/L                   | K549      | 3 | 492.62  | 6.5192 | 0.0130 | 36.24  |
| E/GKKLVAASQAALGL/-                | K597      | 3 | 744.94  | 3.6728 | 0.0155 | 74.83  |
|                                   |           |   |         |        |        |        |
| A/VPDKTVRWCAVSE/H                 | K23       | 2 | 854.91  | 2.0552 | 0.2725 | 95.01  |
| D/AYLAPNLLKPVVAE/F                | K97       | 2 | 830.94  | 3.8603 | 0.1986 | 70.16  |
| E/FYGSKEDPQTFYYAVAVVKKD/S         | K121      | 3 | 873.43  | 1.7841 | 0.0492 | 255.75 |
| E/FYGSKEDPQTFYYAVAVVKKD/S         | K122      | 3 | 873.43  | 1.7841 | 0.0492 | 255.75 |
| P/QTFYYAVAVVKKD/S                 | K121K122  | 2 | 873.43  | 3.0817 | 0.4106 | 98.95  |
| N/IPIGLLYCDLPEPRKPLE/K            | K162      | 3 | 763.19  | 2.1103 | 0.0877 | 180.85 |
| K/DGAGDVAFVKHSTIFE/N              | K225      | 2 | 927.94  | 3.0195 | 0.2601 | 100.07 |
| E/YKDCHLAQVPSHTVVARSMGGKEDIWE/L   | K258      | 5 | 678.53  | 1.3617 | 0.0181 | 553.80 |
| E/YKDCHLAQVPSHTVVARSMGGKE/D       | R273      | 3 | 911.78  | 1.0741 | 0.1445 | 965.90 |
| E/FQLFSSPHGKDLLFK/D               | K315      | 3 | 643.01  | 3.0271 | 0.1654 | 99.12  |
| E/WSVNSVGKIE/C                    | K384      | 2 | 640.82  | 2.1554 | 0.0996 | 173.94 |
| E/FFSEGCAPGSKKDSSLCKLC/M          | K508      | 3 | 814.37  | 3.7103 | 0.0528 | 73.81  |
| E/FFSEGCAPGSKKDSSLCKLC/M          | K509      | 4 | 657.79  | 1.9429 | 0.1067 | 213.93 |
| E/KGDVAFVKHQTVPQNTGGKNPDPWAKNLN/E | K564      | 5 | 665.34  | 1.9385 | 0.0565 | 213.60 |
| N/PDPWAKNLNEKDYE/L                | K571      | 3 | 627.62  | 2.7389 | 0.1073 | 115.31 |
| E/LLCLDGTRKPVVEE/Y                | R587      | 2 | 846.43  | 2.6776 | 0.1856 | 120.24 |
| E/LLCLDGTRKPVVEE/Y                | K588      | 2 | 846.43  | 2.6776 | 0.1856 | 120.24 |
| E/KYLGEYVKA VGNLKRCSTSSLLE/A      | K668      | 3 | 967.47  | 1.9425 | 0.2318 | 222.38 |
| E/YVKA VGNLKRCSTSSLLE/A           | K676      | 2 | 1094.07 | 1.8228 | 0.0455 | 243.56 |

Serotransferrin



|                               |                                |          |   |         |        |        |        |
|-------------------------------|--------------------------------|----------|---|---------|--------|--------|--------|
| Titin                         | R/EVSRKTWTKVMD/F               | K14587   |   | 547.94  | 3.0812 | 0.0772 | 96.18  |
| Haptoglobin $\beta$ chain     | E/HSVRYQCKNYYKLRTG/G           | R49      | 4 | 537.02  | 4.6194 | 0.4786 | 55.93  |
|                               | E/GDGVYTLNDKQWINKAVGDKLPE/C    | K76      | 3 | 951.16  | 2.7233 | 0.2251 | 117.46 |
|                               | K/KQWINKAVGDKLPE/C             | K77      | 3 | 596.65  | 2.7970 | 0.0937 | 111.50 |
|                               | K/KQWINKAVGDKLPECE/A           | K82      | 3 | 693.01  | 2.6014 | 0.0305 | 124.92 |
|                               | E/AVCGKPKNPANPVQR/I            | K151     | 4 | 450.24  | 4.5284 | 0.2733 | 56.91  |
|                               | E/RVMPICLPSKDYAE/V             | K270     | 3 | 614.30  | 2.1056 | 0.0824 | 181.59 |
|                               | E/KKTPKSPVGVQPILNE/H           | K321     | 2 | 949.04  | 3.0825 | 0.1091 | 96.22  |
|                               | E/GSTVPEKTPKSPVGVQPILNE/H      | K322     | 2 | 1234.67 | 3.0408 | 0.1829 | 98.54  |
| Apolipoprotein A-I            | /DEPPQSPWDRVKD/L               | K12      | 3 | 563.65  | 4.2997 | 0.4251 | 61.31  |
|                               | E/FWDNLEKETE/G                 | K77      | 2 | 736.83  | 2.9621 | 0.2513 | 103.03 |
|                               | E/VKAKVQPYLDDFQKKWQEE/M        | K94      | 3 | 847.77  | 1.3809 | 0.0311 | 527.26 |
|                               | E/VKAKVQPYLDDFQKKWQEE/M        | K96      | 3 | 847.77  | 1.3809 | 0.0311 | 527.26 |
|                               | E/MELYRQKVEPLRAE/L             | R116     | 3 | 642.00  | 3.0683 | 0.2103 | 97.34  |
|                               | E/LYRQKVEPLRAELQE/G            | K118     | 3 | 678.70  | 2.6561 | 0.0556 | 120.86 |
|                               | E/YHAKATEHLSTLSEKAPALE/D       | K195     | 4 | 622.32  | 2.4860 | 0.1557 | 135.53 |
| Haptoglobin-related protein   | K/KQWINKAVGDKLPE/C             | K77      | 3 | 596.65  | 2.7970 | 0.0937 | 111.50 |
|                               | K/KQWINKAVGDKLPECE/A           | K82      | 3 | 693.01  | 2.6014 | 0.0305 | 124.92 |
|                               | E/AVCGKPKNPANPVQR/I            | K151     | 4 | 450.24  | 4.5284 | 0.2733 | 56.91  |
| Plasmin light chain B         | E/LCDIPRCTTPPPSSGPTYQCLKGTGE/N | K258     | 3 | 1018.80 | 2.6289 | 0.0613 | 122.89 |
| Ig $\gamma$ -4 chain C region | L/FPPKPKDTLMISRTPE/V           | K126     | 3 | 673.69  | 1.9653 | 0.2180 | 213.62 |
| $\alpha$ -1-antitrypsin       | E/GLKLVDKFLD/D                 | K153     | 2 | 662.37  | 2.5551 | 0.2162 | 130.18 |
|                               | E/LTHDIITKFLD/N                | K298     | 3 | 497.93  | 3.5686 | 0.1205 | 77.98  |
|                               | G/KLQHLENELTHDIITKFLD/N        | K283K298 | 2 | 867.95  | 3.0064 | 0.4063 | 102.18 |
|                               | E/EAPLKLSKAVHKAVLTIDE/K        | K352     | 2 | 1113.13 | 2.0188 | 0.1569 | 199.69 |
|                               | E/EAPLKLSKAVHKAVLTIDEKGTG/A    | K355     | 4 | 660.62  | 2.9440 | 0.0554 | 102.94 |
|                               | E/EAPLKLSKAVHKAVLTIDEKGTG/A    | K359     | 4 | 660.62  | 2.9440 | 0.0554 | 102.94 |
|                               | N/TKSPLFMGKVVNPTQK/-           | K404     | 3 | 646.35  | 2.9835 | 0.3288 | 102.85 |
|                               | E/QNTKSPLFMGKVVNPTQK/-         | K418     | 3 | 727.05  | 2.2207 | 0.3217 | 171.33 |

|                                           |                                                             |             |   |        |             |          |         |
|-------------------------------------------|-------------------------------------------------------------|-------------|---|--------|-------------|----------|---------|
| Girdin (APE) (HKRP1)                      | S/EV <b>SRYKE</b> /R                                        | R331K333    | 3 | 412.19 | 2.8321      | 0.1307   | 109.53  |
| α-2-HS-glycoprotein chain B               | E/ <b>VK</b> WVPQQPSGELFE/I                                 | K49         | 2 | 903.45 | 2.9152      | 0.3063   | 106.42  |
|                                           | E/TTCHVLDPTPV <b>ARCSV</b> /R                               | R81         | 3 | 658.98 | 2.4859      | 0.1301   | 202.28  |
|                                           | E/FTVSGTDCV <b>AKEATE</b> /A                                | K193        | 3 | 888.90 | 2.0658      | 0.1211   | 189.32  |
|                                           | E/AAKCNLL <b>AEKQYGFCKATLSE</b> /K                          | K207        | 2 | 855.93 | 1.7500      | 0.0651   | 267.99  |
|                                           | G/ <b>FCKATLSEKLGGA</b> E/V                                 | K213        | 3 | 558.28 | 1.7131      | 0.2072   | 295.10  |
|                                           | E/ <b>KQYGFCKATLSEKLGGA</b> E/V                             | K219        | 3 | 717.02 | 3.8009      | 0.2399   | 71.77   |
| Centriolin                                | H/ER <b>ARRLMKE</b> /L                                      | R2115/K2118 | 3 | 510.26 | 4.4383      | 0.3934   | 58.71   |
| Complement factor H                       | E/ <b>VVK</b> CLPVTAPENGKIVSSAMEPDRE/Y                      | K127        | 3 | 961.82 | 2.9292      | 0.4225   | 106.86  |
|                                           | E/MHCSDDGFW <b>SKEKPKC</b> VE/I                             | K200        | 4 | 601.26 | 4.0614      | 0.1642   | 65.46   |
|                                           | E/ <b>ISCKSPDVINGSPISQKI</b> YKENE/R                        | K193 o K206 | 3 | 961.82 | 1.8912      | 0.2486   | 235.42  |
|                                           | E/ <b>TTCYMGK</b> WSSPPQCE/G                                | K501        | 2 | 997.90 | 2.3201      | 0.2439   | 154.88  |
| Ig γ-1 chain C region                     | E/LLGGPSVFL <b>FPPKPKD</b> TLMISRTPE/V                      | K129        | 3 | 673.69 | 1.9907      | 0.1311   | 204.46  |
|                                           | P/ <b>KD</b> TLMISRTPE/V                                    | K131        | 3 | 674.02 | 2.4707      | 0.1130   | 136.52  |
| β-2-glycoprotein 1                        | ./GRTCP <b>KPDDL</b> PFSTVV <b>PLKTF</b> YEPGEE/I           | K19         | 4 | 811.14 | 1.4574      | 0.1616   | 486.61  |
|                                           | E/ <b>KFK</b> NGMLHG <b>DKV</b> SFFCKNKE/K                  | K276        | 3 | 860.09 | 1.2985      | 0.0620   | 688.00  |
|                                           | E/ <b>HSSLAFW</b> KTDASDV <b>KPC</b> /-                     | K317        | 3 | 704.33 | 2.7325      | 0.0760   | 115.59  |
| Ig γ-2 chain C region                     | N/FGTQTYTCNV <b>DHKPS</b> NTKVDKTVE/R                       | K88         | 4 | 733.85 | 4.188749987 | 0.443489 | 63.57   |
|                                           | E/ <b>RKCC</b> VEPPCPAPPVAGPSVFL <b>FPPKPKD</b> TLMISRTPE/V | K125        | 5 | 900.45 | 1.1342      | 0.0396   | 1570.34 |
| α-2-macroglobulin                         | ./SV <b>SGK</b> PQYMLVPSLLHTETTE/K                          | K5          | 3 | 860.10 | 4.5263      | 0.1135   | 56.76   |
|                                           | E/ <b>GLR</b> VGfYE/S                                       | R681        | 2 | 551.77 | 1.7237      | 0.1118   | 281.03  |
| Nesprin-1                                 | E/ <b>SLDKLSQR</b> /G                                       | K2583/R2587 | 2 | 635.82 | 5.8942      | 0.5242   | 41.17   |
| Centrosome-associated protein             | G/ <b>ERELLQAAKE</b> /N                                     | K1294       | 3 | 450.24 | 2.9619      | 0.1153   | 102.17  |
| Coiled-coil domain-containing protein 135 | R/ <b>EEEEERLMEAEKAK</b> PD/A                               | K225        | 3 | 655.34 | 3.1375      | 0.3244   | 94.94   |

|                                                                     |                                            |             |   |         |        |        |          |
|---------------------------------------------------------------------|--------------------------------------------|-------------|---|---------|--------|--------|----------|
| Nucleoprotein TPR                                                   | R/SQNTKISTQLDFASKRYE/M                     | K722/R723   | 4 | 610.79  | 1.6746 | 0.0539 | 297.69   |
| Ig κ chain C region                                                 | E/AKVQWKVDNALQSGNSQESVTE/Q                 | K37         | 2 | 1291.62 | 1.0368 | 0.0362 | 22644.48 |
|                                                                     | Y/EKHKVYACEVTHQGLSSPVTKSFNRGEC/-           | K80         | 3 | 1134.04 | 2.5931 | 0.0997 | 125.88   |
|                                                                     | E/KHKVYACEVTHQGLSSPVTKSFNRGEC/-            | K80/K82     | 2 | 1133.54 | 2.4075 | 0.0990 | 142.55   |
|                                                                     | E/VTHQGLSSPVTKSFNRGEC/-                    | K99         | 3 | 756.03  | 1.5876 | 0.0264 | 340.82   |
| Nebulette                                                           | D/AAYKGVHPHIVEMDRRPGII/V                   | K822        | 5 | 485.06  | 1.9903 | 0.1493 | 205.26   |
| Ig α-1 chain C region                                               | E/SKTPLTATLSKSGNTFRPE/V                    | K212        | 3 | 733.05  | 2.8178 | 0.1237 | 110.36   |
| Histidine-rich glycoprotein                                         | E/SCPGKFKSGFPQVSMFFHTHFPK/-                | K489        | 4 | 706.84  | 1.1471 | 0.0695 | 1558.36  |
| Fibrinopeptide A                                                    | E/SSSHHPGIAEFPSRGKSSSYSKQFTSSTSYNRGDSTFE/S | R573 o K581 | 5 | 861.39  | 2.4299 | 0.0402 | 139.94   |
| Fibrinopeptide B                                                    | E/RKAPDAGGCLHADPDLGVLCPGTCQLQE/A           | K44         | 3 | 539.25  | 1.9038 | 0.1289 | 224.61   |
|                                                                     | E/YCRTPCTVSCNIPVVSGKECEE/I                 | K195        | 3 | 936.40  | 3.1492 | 0.1627 | 93.42    |
|                                                                     | E/MEDWKGDVKVKAHYGGFTVQNE/A                 | K304        | 3 | 868.07  | 1.7966 | 0.2224 | 267.22   |
| Apolipoprotein A-II                                                 | E/AKSYFEKSKEQLTPLIKKAGTE/L                 | K44         | 5 | 532.49  | 2.6724 | 0.0739 | 119.74   |
|                                                                     | E/AKSYFEKSKEQLTPLIKKAGTE/L                 | K46         | 5 | 532.49  | 2.6724 | 0.0739 | 119.74   |
| Serine/threonine-protein phosphatase 2A 56 kDa regulatory subunit α | R/EKKKELEREE/L                             | K447 o R451 | 3 | 547.95  | 3.2961 | 0.2921 | 88.02    |
| TBC1 domain family member 1                                         | E/EVQKLRPRNEQRENE/L                        | R437 o R439 | 3 | 750.37  | 2.8718 | 0.0334 | 106.87   |
| Protein max                                                         | F/QSAADKRAHNNALERKRRD/H                    | K24         | 5 | 485.06  | 1.9495 | 0.1023 | 212.19   |
| Vitamin D-binding protein                                           | E/ACCAEGADPDCYDTRTSALSAKSCE/S              | K78         | 3 | 986.72  | 2.9824 | 0.0682 | 100.97   |
|                                                                     | E/RKLCMAALKHQEQEFPTYVEPTNDEICE/A           | R103        | 3 | 1190.23 | 2.0961 | 0.2027 | 186.32   |
|                                                                     | R/KLCMAALKHQEQEFPTYVEPTNDEICE/A            | K104        | 3 | 1189.89 | 2.0961 | 0.2027 | 186.32   |
| Complement C3c α' chain                                             | J/SPMYSIITPNILRLE/S                        | Nterm       | 2 | 955.51  | 1.2567 | 0.0463 | 798.20   |
|                                                                     | E/ACKKVFLDCCNYITE/L                        | K699        | 2 | 1041.96 | 3.1165 | 0.2680 | 95.51    |

|                                                        |                             |             |   |         |        |        |          |
|--------------------------------------------------------|-----------------------------|-------------|---|---------|--------|--------|----------|
|                                                        | E/KEDGKLNKLCRD/E            | K1475/R1485 | 2 | 879.48  | 4.1808 | 0.0686 | 62.90    |
| Apolipoprotein C-I                                     | P/DVSSALDKLKE/F             | K10         | 2 | 683.86  | 3.5058 | 0.0337 | 79.82    |
|                                                        | ./TPDVSSALDKLKE/F           | K12         | 2 | 782.90  | 0.9851 | 0.0962 | -7153.82 |
| Low molecular weight growth-promoting factor           | E/ATKTVGSDTFYSFKYE/I        | K46 o K57   | 2 | 1003.47 | 2.6208 | 0.2090 | 124.09   |
|                                                        | E/IKEGDCPVQSGKTWQDCE/Y      | K71         | 3 | 767.33  | 2.4972 | 0.2027 | 135.11   |
| Fibrinogen $\gamma$ chain                              | ./YVATRDNCCILDERFG/S        | R5 o R14    | 3 | 767.33  | 2.4972 | 0.2027 | 135.11   |
|                                                        | E/IYNSNNQKIVNLKE/K          | K120        | 2 | 919.98  | 4.3279 | 0.4520 | 60.47    |
| Vitamin K-dependent protein S                          | E/GYRYNLKSKSCEDIDECSE/N     | K196        | 3 | 839.36  | 2.9659 | 0.2260 | 102.68   |
|                                                        | E/TKVYFAGFPRKVE/S           | K383        | 3 | 568.64  | 1.2968 | 0.0574 | 720.41   |
| Apolipoprotein C-II                                    | ./TQPPQQDEMPSPTFLTQVKE/S    | K19         | 2 | 1248.09 | 2.3605 | 0.1958 | 148.20   |
| Apolipoprotein D                                       | E/IEKIPTTFE/N               | K31         | 3 | 620.32  | 1.2724 | 0.1010 | 1273.73  |
| Complement C1s subcomponent light chain                | E/VLGPELPKCVPVCGVPREPFEE/K  | K405        | 3 | 891.11  | 1.5555 | 0.0316 | 360.64   |
| Golgin subfamily A member 3                            | E/QVRLQARKWLEEQLKQYRVKRQQ/E | R166/K168   | 2 | 1125.56 | 3.6073 | 0.1217 | 76.83    |
| DnaJ homolog subfamily C member 13                     | E/HRTELLTEALRFRTD/F         | R90         | 2 | 1009.98 | 1.4006 | 0.0725 | 517.62   |
| Hemopexin                                              | E/FVWKSHKWDRELISE/R         | K54         | 3 | 708.36  | 1.5739 | 0.1749 | 386.46   |
| Receptor-interacting serine/threonine-protein kinase 5 | E/LYESLMNIANRKQEE/M         | R412        | 2 | 1007.95 | 2.2719 | 0.0170 | 157.44   |
| Apolipoprotein A-IV                                    | E/LTQQLNALFQDKLGE/V         | K45         | 2 | 940.49  | 3.3190 | 0.4918 | 90.58    |
| WW domain-binding protein 11                           | K/MKDPKQIIRDME/K            | K48         | 2 | 849.43  | 2.0001 | 0.2673 | 210.25   |
| Complement C4 $\gamma$ chain                           | E/VKKYVLPNFE/V              | K215        | 2 | 699.88  | 1.1009 | 0.0629 | 2757.35  |
| Obscurin-like protein 1                                | D/GGFVLKVLVYCQAKD/R         | K305        | 2 | 880.40  | 4.1786 | 0.0929 | 62.98    |

|                                                   |                        |             |   |         |        |        |        |
|---------------------------------------------------|------------------------|-------------|---|---------|--------|--------|--------|
| Transmembrane and TPR repeat-containing protein 3 | E/LKALPILEELLRYYPD/H   | K720        | 2 | 1054.98 | 2.6859 | 0.0404 | 118.68 |
| Putative alpha-1-antitrypsin-related protein      | E/YITNFPLFIGKVVNPTQK/- | K392 o K399 | 3 | 721.71  | 1.7335 | 0.0128 | 273.96 |
